# Supplementary material for: Epidemiology and outcomes of gastroparesis, as documented in general practice records, in the United Kingdom
Source: PubMed Central journal article supplement — Gut. 2020 Jun 3;70(4):644–53. doi: 10.1136/gutjnl-2020-321277 (PMC7948194; doi:10.1136/gutjnl-2020-321277), 2020-06-03
Supplement: gutjnl-2020-321277supp001.pdf [file gutjnl-2020-321277supp001.pdf]

**Supplementary Text S1** Inclusion criteria for the different analysis cohorts

A number of different inclusion criteria were defined for different study objectives.

*Inclusion criteria for prevalence analysis cohort*

The inclusion criteria for the prevalence analysis cohort required that patients: 1) were registered with a general practitioner (GP) practice for at least one day at any time between 1 January 2000 and 31 December 2016; 2) were considered “acceptable” according to Clinical Practice Research Datalink (CPRD) data quality criteria using the “Acceptable Patient Flag” variable in the patient file; and 3) came from a GP practice that was ‘up to research standard’ using the ‘up-to-standard’ (UTS) date in the practice file.

*Inclusion criteria for demographic analysis cohort*

The inclusion criteria for the demographic and outcomes analysis cohort required that patients: 1) were eligible for the prevalence analysis cohort, 2) had at least 365 days of follow-up before gastroparesis diagnosis, 3) had at least 365 days of follow-up after gastroparesis diagnosis.

*Inclusion criteria for incidence analysis cohort*

Patients included in the incidence cohort: 1) met criteria for the prevalence analysis cohort; 2) had at least 365 days of CPRD database registration before the cohort entry date, defined as the patient’s ‘Current Registration Date’ plus 365 days, and 3) did not have a history of gastroparesis within one year prior to cohort entry date.

**Supplementary Text S2** Handling of patient deaths

Date of death in the CPRD was obtained from the patient file. This was generated using a specific CPRD algorithm, which included: information on the recorded death date for a patient in the patient file; the transfer out date in the patient file with transfer out reason as “death”; the event date in the Clinical/Referral file with Read code indicating “death”; and the event date with “death administration” for entity type (enttype = 148) in the Additional file (online supplementary table S5). In patients with linkage to the HES–ONS death registry, variable “dod”, for date of death, will also be used to determine vital status and death date for a patient.

**Supplementary Table S1** Medcodes and Read codes for gastroparesis cohort definition

| Medcode | Read code <sup>a</sup> | Read term                                   |
|---------|------------------------|---------------------------------------------|
| 28776   | J16y900                | Delayed gastric emptying                    |
| 34364   | J16y600                | Gastric atonia                              |
| 35300   | J16y800                | Gastric dysmotility                         |
| 55239   | C10EQ00                | Type 1 diabetes mellitus with gastroparesis |
| 63690   | C10FR00                | Type 2 diabetes mellitus with gastroparesis |
| 108724  | C10EQ11                | Type I diabetes mellitus with gastroparesis |

<sup>a</sup>Read codes act as a coded thesaurus of clinical terms and have been used in the National Health Service since 1985,<sup>1</sup> and now form the standard clinical terminology system used in GP practices in the UK.

**Supplementary Table S2** Medcodes and Read codes for demographic variables**Smoking status – never smoked**

| Medcode | Read code | Read term                                                 |
|---------|-----------|-----------------------------------------------------------|
| 33      | 1371.00   | Never smoked tobacco                                      |
| 11788   | 1371.11   | Non-smoker                                                |
| 101878  | 9kn..11   | Non-smoker annual review                                  |
| 98177   | 9kn..00   | Non-smoker annual review-enhanced services administration |

**Smoking status – ex-smoker**

| Medcode | Read code | Read term                                                  |
|---------|-----------|------------------------------------------------------------|
| 60      | 137L.00   | Current non-smoker                                         |
| 90      | 137S.00   | Ex smoker                                                  |
| 776     | 137K.00   | Stopped smoking                                            |
| 10898   | 13p4.00   | Smoking free weeks                                         |
| 12878   | 137T.00   | Date ceased smoking                                        |
| 12946   | 137F.00   | Ex-smoker - amount unknown                                 |
| 12955   | 1379.00   | Ex-moderate smoker (10-19/day)                             |
| 12956   | 137A.00   | Ex-heavy smoker (20-39/day)                                |
| 12957   | 1378.00   | Ex-light smoker (1-9/day)                                  |
| 12959   | 137B.00   | Ex-very heavy smoker (40+/day)                             |
| 12961   | 1377.00   | Ex-trivial smoker (<1/day)                                 |
| 19488   | 137O.00   | Ex cigar smoker                                            |
| 26470   | 137N.00   | Ex pipe smoker                                             |
| 97210   | 137j.00   | Ex-cigarette smoker                                        |
| 98447   | 9km..00   | Ex-smoker annual review - enhanced services administration |
| 99838   | 137K000   | Recently stopped smoking                                   |
| 100495  | 137I.00   | Ex roll-up cigarette smoker                                |
| 100963  | 9km..11   | Ex-smoker annual review                                    |
| 106891  | 137i.00   | Ex-tobacco chewer                                          |

**Smoking status – current smoker**

| Medcode | Read code | Read term                                             |
|---------|-----------|-------------------------------------------------------|
| 90522   | 745Hz00   | Smoking cessation therapy NOS                         |
| 74907   | 745H.00   | Smoking cessation therapy                             |
| 94958   | 745H400   | Smoking cessation drug therapy                        |
| 91708   | 745Hy00   | Other specified smoking cessation therapy             |
| 81440   | 745H000   | Nicotine replacement therapy using nicotine patches   |
| 85247   | 745H200   | Nicotine replacement therapy using nicotine inhalator |
| 110953  | 745H500   | (blank) <sup>a</sup>                                  |
| 89464   | 745H300   | Nicotine replacement therapy using nicotine lozenges  |
| 85975   | 745H100   | Nicotine replacement therapy using nicotine gum       |
| 70746   | E251100   | Tobacco dependence, continuous                        |

|        |         |                                                  |
|--------|---------|--------------------------------------------------|
| 95610  | E251000 | Tobacco dependence, unspecified                  |
| 108835 | E251200 | Tobacco dependence, episodic                     |
| 68658  | E251z00 | Tobacco dependence NOS                           |
| 32687  | E251.00 | Tobacco dependence                               |
| 72706  | E251300 | Tobacco dependence in remission                  |
| 54     | 137..00 | Tobacco consumption                              |
| 12960  | 137Z.00 | Tobacco consumption NOS                          |
| 12965  | 137X.00 | Cigarette consumption                            |
| 12963  | 137Y.00 | Cigar consumption                                |
| 12962  | 137E.00 | Tobacco consumption unknown                      |
| 46300  | 137g.00 | Cigarette pack-years                             |
| 12958  | 1372.00 | Trivial smoker - < 1 cig/day                     |
| 12944  | 1373.00 | Light smoker - 1-9 cigs/day                      |
| 1878   | 1374.00 | Moderate smoker - 10-19 cigs/d                   |
| 3568   | 1375.00 | Heavy smoker - 20-39 cigs/day                    |
| 1822   | 1376.00 | Very heavy smoker - 40+cigs/d                    |
| 12967  | 137a.00 | Pipe tobacco consumption                         |
| 31114  | 137b.00 | Ready to stop smoking                            |
| 12964  | 137C.00 | Keeps trying to stop smoking                     |
| 30423  | 137c.00 | Thinking about stopping smoking                  |
| 41979  | 137e.00 | Smoking restarted                                |
| 12240  | 137G.00 | Trying to give up smoking                        |
| 12947  | 137H.00 | Pipe smoker                                      |
| 12943  | 137J.00 | Cigar smoker                                     |
| 12945  | 137M.00 | Rolls own cigarettes                             |
| 93     | 137P.00 | Cigarette smoker                                 |
| 12952  | 137Q.00 | Smoking started                                  |
| 10558  | 137R.00 | Current smoker                                   |
| 12966  | 137V.00 | Smoking reduced                                  |
| 46654  | 137D.00 | Admitted tobacco cons untrue ?                   |
| 30762  | 137d.00 | Not interested in stopping smoking               |
| 62686  | 137h.00 | Minutes from waking to first tobacco consumption |
| 46321  | 137f.00 | Reason for restarting smoking                    |
| 101338 | 137m.00 | Failed attempt to stop smoking                   |
| 104477 | 6791000 | Health education - parental smoking              |
| 2111   | 6791.00 | Health ed. - smoking                             |
| 10211  | 13p..00 | Smoking cessation milestones                     |
| 34126  | 13p0.00 | Negotiated date for cessation of smoking         |
| 102951 | 13p8.00 | Lost to smoking cessation follow-up              |
| 97643  | 38DH.00 | Fagerstrom test for nicotine dependence          |
| 10184  | 67A3.00 | Pregnancy smoking advice                         |
| 18926  | 67H1.00 | Lifestyle advice regarding smoking               |
| 98137  | 67H6.00 | Brief intervention for smoking cessation         |
| 9833   | 8B2B.00 | Nicotine replacement therapy                     |
| 110692 | 8B31G00 | Varencline                                       |
| 25106  | 8B3f.00 | Nicotine replacement therapy provided free       |

|        |         |                                                               |
|--------|---------|---------------------------------------------------------------|
| 32572  | 8B3Y.00 | Over the counter nicotine replacement therapy                 |
| 67178  | 8BP3.00 | Nicotine replacement therapy provided by community pharmacist |
| 7622   | 8CAL.00 | Smoking cessation advice                                      |
| 41042  | 8CAg.00 | Smoking cessation advice provided by community pharmacist     |
| 103507 | 8CdB.00 | Stop smoking service opportunity signposted                   |
| 18573  | 8H7i.00 | Referral to smoking cessation advisor                         |
| 98245  | 8HBM.00 | Stop smoking face to face follow-up                           |
| 98154  | 8HkQ.00 | Referral to NHS stop smoking service                          |
| 10742  | 8HTK.00 | Referral to stop-smoking clinic                               |
| 66409  | 8I2I.00 | Nicotine replacement therapy contraindicated                  |
| 63717  | 8I2J.00 | Bupropion contraindicated                                     |
| 24529  | 8I39.00 | Nicotine replacement therapy refused                          |
| 57639  | 8I3M.00 | Bupropion refused                                             |
| 32356  | 8I6H.00 | Smoking review not indicated                                  |
| 100099 | 8IAj.00 | Smoking cessation advice declined                             |
| 104230 | 8IEK.00 | Smoking cessation programme declined                          |
| 104185 | 8IEM.00 | Smoking cessation drug therapy declined                       |
| 12619  | 9hG1.00 | Excepted from smoking quality indicators: Informed dissent    |
| 30644  | 9hG0.00 | Excepted from smoking quality indicators: Patient unsuitable  |
| 58678  | 9hG..00 | Exception reporting: smoking quality indicators               |
| 96992  | 9kc..00 | Smoking cessation - enhanced services administration          |
| 98493  | 9kc0.00 | Smoking cessatn monitor template complet - enhanc serv admin  |
| 98347  | 9ko..00 | Current smoker annual review - enhanced services admin        |
| 11356  | 9N2k.00 | Seen by smoking cessation advisor                             |
| 11527  | 9N4M.00 | DNA - Did not attend smoking cessation clinic                 |
| 101851 | 9Ndg.00 | Declined consent for follow-up by smoking cessation team      |
| 101634 | 9NdV.00 | Consent given follow-up after smoking cessation intervention  |
| 101210 | 9NdW.00 | Consent given for smoking cessation data sharing              |
| 101325 | 9NdY.00 | Declin cons follow-up evaluation after smoking cess interven  |
| 101854 | 9NdZ.00 | Declined consent for smoking cessation data sharing           |
| 102361 | 9NS0200 | Referral for smoking cessation service offered                |
| 58597  | 9OO8.00 | Stop smoking monitor phone inv                                |
| 66387  | 9OO6.00 | Stop smoking monitor 3rd lettr                                |
| 42722  | 9OO4.00 | Stop smoking monitor 1st lettr                                |
| 40418  | 9OO2.00 | Refuses stop smoking monitor                                  |
| 28834  | 9OO..00 | Anti-smoking monitoring admin.                                |
| 63901  | 9OO9.00 | Stop smoking monitoring delete                                |
| 105572 | 9OOB.00 | Stop smoking invitation short message service text message    |
| 53101  | 9OO7.00 | Stop smoking monitor verb.inv.                                |
| 60720  | 9OO5.00 | Stop smoking monitor 2nd lettr                                |
| 40417  | 9OO3.00 | Stop smoking monitor default                                  |
| 12953  | 9OO1.00 | Attends stop smoking monitor.                                 |

|        |         |                                                         |
|--------|---------|---------------------------------------------------------|
| 21637  | 9OOZ.00 | Stop smoking monitor admin.NOS                          |
| 19485  | 9OOA.00 | Stop smoking monitor.chk done                           |
| 106384 | 9OOB100 | Stop smoking invitation second SMS text message         |
| 104086 | 9OOB000 | Stop smoking invitation first SMS text message          |
| 106385 | 9OOB200 | Stop smoking invitation third SMS text message          |
| 6359   | E023.00 | Nicotine withdrawal                                     |
| 43433  | SMC..00 | Toxic effect of tobacco and nicotine                    |
| 53031  | TJHy200 | Adverse reaction to nicotine                            |
| 63016  | U609900 | [X]Bupropion causing adverse effects in therapeutic use |
| 12954  | ZV4K000 | [V]Tobacco use                                          |
| 35055  | ZV6D800 | [V]Tobacco abuse counselling                            |
| 38112  | 13p5.00 | Smoking cessation programme start date                  |
| 104310 | 9ko..11 | Current smoker annual review                            |
| 12942  | 137..11 | Smoker - amount smoked                                  |

<sup>a</sup>There are instances in the CPRD Code Browser when a Read code has a missing Read term. Read codes with missing descriptions stem from the fact that CPRD receives periodic updates on the list of available Read codes and descriptors, and therefore there may be new codes added and utilised by the GP that do not yet have descriptors. Read codes with missing descriptors tend to be relatively new to the database, with few events associated with them.

GP, general practitioner; NHS, national health service; NOS, not otherwise specified; SMS, short message service.

#### Alcohol use – never drink

| Medcode | Read code | Read term           |
|---------|-----------|---------------------|
| 4447    | 1361.12   | Non-drinker alcohol |
| 12949   | 1361.00   | Teetotaller         |
| 12970   | 1361.11   | Non drinker alcohol |
| 12979   | 136M.00   | Current non drinker |

#### Alcohol use – ex-drinker

| Medcode | Read code | Read term                                     |
|---------|-----------|-----------------------------------------------|
| 967     | 1367.00   | Stopped drinking alcohol                      |
| 22933   | 136A.00   | Ex-trivial drinker (<1u/day)                  |
| 26471   | 136B.00   | Ex-light drinker - (1-2u/day)                 |
| 19495   | 136C.00   | Ex-moderate drinker - (3-6u/d)                |
| 19493   | 136D.00   | Ex-heavy drinker - (7-9u/day)                 |
| 12983   | 136E.00   | Ex-very heavy drinker-(>9u/d)                 |
| 106560  | 136e.00   | Declines to state current alcohol consumption |
| 8430    | 1462.00   | H/O: alcoholism                               |
| 12442   | 66e..00   | Alcohol disorder monitoring                   |
| 32964   | 66e0.00   | Alcohol abuse monitoring                      |
| 2083    | 8BA8.00   | Alcohol detoxification                        |
| 29691   | 8G32.00   | Aversion therapy - alcoholism                 |
| 21650   | 8H35.00   | Admitted to alcohol detoxification centre     |
| 9849    | 8H7p.00   | Referral to community alcohol team            |
| 12554   | 8HHe.00   | Referral to community drug and alcohol team   |

|       |         |                                                              |
|-------|---------|--------------------------------------------------------------|
| 94553 | 8HkG.00 | Referral to specialist alcohol treatment service             |
| 96993 | 8HkJ.00 | Referral to alcohol brief intervention service               |
| 97261 | 8IAF.00 | Brief intervention for excessive alcohol consumptn declined  |
| 97680 | 8IAJ.00 | Declined referral to specialist alcohol treatment service    |
| 11740 | 9k1..00 | Alcohol misuse - enhanced services administration            |
| 63529 | 9k12.00 | Alcohol misuse - enhanced service completed                  |
| 96053 | 9k1A.00 | Brief intervention for excessive alcohol consumptn completed |
| 96054 | 9k1B.00 | Extended intervention for excessive alcohol consumptn complt |
| 9489  | 9NN2.00 | Under care of community alcohol team                         |
| 16225 | E010.00 | Alcohol withdrawal delirium                                  |
| 22277 | E010.11 | DTs - delirium tremens                                       |
| 1476  | E010.12 | Delirium tremens                                             |
| 24485 | E231300 | Chronic alcoholism in remission                              |
| 41983 | Z191.00 | Alcohol detoxification                                       |
| 46677 | Z191100 | Alcohol withdrawal regime                                    |
| 61383 | Z191200 | Planned reduction of alcohol consumption                     |
| 95181 | Z191211 | Alcohol reduction programme                                  |
| 64409 | Z191400 | Self-monitoring of alcohol intake                            |
| 30460 | Z4B1.00 | Alcoholism counselling                                       |
| 97163 | ZC22200 | Advice to change alcoholic drink intake                      |
| 54209 | ZC2H.00 | Advice to change alcohol intake                              |
| 11140 | ZG23100 | Advice on alcohol consumption                                |
| 7123  | ZV11300 | [V]Personal history of alcoholism                            |
| 16587 | ZV11311 | [V]Problems related to lifestyle alcohol use                 |
| 8388  | ZV57A00 | [V]Alcohol rehabilitation                                    |
| 8030  | ZV6D600 | [V]Alcohol abuse counselling and surveillance                |

H/O, history of.

#### Alcohol use – current drinker

| Medcode | Read code | Read term                      |
|---------|-----------|--------------------------------|
| 27      | 136..00   | Alcohol consumption            |
| 12975   | 1362      | Trivial drinker - <1u/day      |
| 385     | 1362.11   | Drinks rarely                  |
| 749     | 1362.12   | Drinks occasionally            |
| 12972   | 1363      | Light drinker - 1-2u/day       |
| 322     | 1364      | Moderate drinker - 3-6u/day    |
| 1618    | 1365      | Heavy drinker - 7-9u/day       |
| 12977   | 1366      | Very heavy drinker - >9u/day   |
| 12976   | 1369      | Suspect alcohol abuse - denied |
| 102665  | 136a.00   | Increasing risk drinking       |
| 99877   | 136b.00   | Feels should cut down drinking |
| 102448  | 136c.00   | Higher risk drinking           |
| 103230  | 136d.00   | Lower risk drinking            |
| 12971   | 136F.00   | Spirit drinker                 |



|        |         |                                                          |
|--------|---------|----------------------------------------------------------|
| 2689   | 136G.00 | Beer drinker                                             |
| 12968  | 136H.00 | Drinks beer and spirits                                  |
| 12969  | 136I.00 | Drinks wine                                              |
| 956    | 136J.00 | Social drinker                                           |
| 12982  | 136K.00 | Alcohol intake above recommended sensible limits         |
| 26472  | 136L.00 | Alcohol intake within recommended sensible limits        |
| 12980  | 136N.00 | Light drinker                                            |
| 12985  | 136O.00 | Moderate drinker                                         |
| 8999   | 136P.00 | Heavy drinker                                            |
| 12984  | 136Q.00 | Very heavy drinker                                       |
| 19401  | 136R.00 | Binge drinker                                            |
| 19494  | 136S.00 | Hazardous alcohol use                                    |
| 30695  | 136T.00 | Harmful alcohol use                                      |
| 93415  | 136V.00 | Alcohol units per week                                   |
| 94670  | 136W.00 | Alcohol misuse                                           |
| 97126  | 136X.00 | Alcohol units consumed on heaviest drinking day          |
| 101718 | 136Y.00 | Drinks in morning to get rid of hangover                 |
| 12981  | 136Z.00 | Alcohol consumption NOS                                  |
| 18156  | 13Y8.00 | Alcoholics anonymous                                     |
| 84218  | 13ZY.00 | Disqualified from driving due to excess alcohol          |
| 38061  | 1B1c.00 | Alcohol induced hallucinations                           |
| 65754  | C150500 | Alcohol-induced pseudo-Cushing's syndrome                |
| 16237  | E01..00 | Alcoholic psychoses                                      |
| 20762  | E011.00 | Alcohol amnestic syndrome                                |
| 4500   | E011000 | Korsakov's alcoholic psychosis                           |
| 11106  | E011100 | Korsakov's alcoholic psychosis with peripheral neuritis  |
| 18636  | E011200 | Wernicke-Korsakov syndrome                               |
| 41920  | E011z00 | Alcohol amnestic syndrome NOS                            |
| 54505  | E012.00 | Other alcoholic dementia                                 |
| 27342  | E012.11 | Alcoholic dementia NOS                                   |
| 37946  | E012000 | Chronic alcoholic brain syndrome                         |
| 25110  | E013.00 | Alcohol withdrawal hallucinosis                          |
| 57939  | E014.00 | Pathological alcohol intoxication                        |
| 20407  | E014.11 | Drunkeness - pathological                                |
| 30404  | E015.00 | Alcoholic paranoia                                       |
| 33670  | E01y.00 | Other alcoholic psychosis                                |
| 2082   | E01y000 | Alcohol withdrawal syndrome                              |
| 68111  | E01yz00 | Other alcoholic psychosis NOS                            |
| 67651  | E01z.00 | Alcoholic psychosis NOS                                  |
| 2084   | E23..00 | Alcohol dependence syndrome                              |
| 2081   | E23..11 | Alcoholism                                               |
| 1399   | E23..12 | Alcohol problem drinking                                 |
| 5740   | E230.00 | Acute alcoholic intoxication in alcoholism               |
| 57714  | E230.11 | Alcohol dependence with acute alcoholic intoxication     |
| 40530  | E230000 | Acute alcoholic intoxication, unspecified, in alcoholism |
| 56947  | E230100 | Continuous acute alcoholic intoxication in alcoholism    |

|       |         |                                                              |
|-------|---------|--------------------------------------------------------------|
| 21624 | E230200 | Episodic acute alcoholic intoxication in alcoholism          |
| 59574 | E230300 | Acute alcoholic intoxication in remission, in alcoholism     |
| 36296 | E230z00 | Acute alcoholic intoxication in alcoholism NOS               |
| 31443 | E231.00 | Chronic alcoholism                                           |
| 37605 | E231.11 | Dipsomania                                                   |
| 43193 | E231000 | Unspecified chronic alcoholism                               |
| 24064 | E231100 | Continuous chronic alcoholism                                |
| 26106 | E231200 | Episodic chronic alcoholism                                  |
| 33635 | E231z00 | Chronic alcoholism NOS                                       |
| 6169  | E23z.00 | Alcohol dependence syndrome NOS                              |
| 7746  | E250.00 | Nondependent alcohol abuse                                   |
| 12271 | E250.11 | Drunkenness NOS                                              |
| 27518 | E250.12 | Hangover (alcohol)                                           |
| 17777 | E250.13 | Inebriety NOS                                                |
| 3782  | E250.14 | Intoxication - alcohol                                       |
| 669   | E250000 | Nondependent alcohol abuse, unspecified                      |
| 23610 | E250100 | Nondependent alcohol abuse, continuous                       |
| 12974 | E250200 | Nondependent alcohol abuse, episodic                         |
| 31569 | E250300 | Nondependent alcohol abuse in remission                      |
| 28150 | E250z00 | Nondependent alcohol abuse NOS                               |
| 5611  | Eu10.00 | [X]Mental and behavioural disorders due to use of alcohol    |
| 44299 | Eu10000 | [X]Mental & behav dis due to use alcohol: acute intoxication |
| 9508  | Eu10011 | [X]Acute alcoholic drunkenness                               |
| 21879 | Eu10100 | [X]Mental and behav dis due to use of alcohol: harmful use   |
| 39327 | Eu10200 | [X]Mental and behav dis due to use alcohol: dependence syndr |
| 28780 | Eu10211 | [X]Alcohol addiction                                         |
| 5758  | Eu10212 | [X]Chronic alcoholism                                        |
| 69691 | Eu10213 | [X]Dipsomania                                                |
| 20514 | Eu10300 | [X]Mental and behav dis due to use alcohol: withdrawal state |
| 64101 | Eu10400 | [X]Men & behav dis due alcoh: withdrawl state with delirium  |
| 17259 | Eu10411 | [X]Delirium tremens, alcohol induced                         |
| 12353 | Eu10500 | [X]Mental & behav dis due to use alcohol: psychotic disorder |
| 6467  | Eu10511 | [X]Alcoholic hallucinosis                                    |
| 65932 | Eu10512 | [X]Alcoholic jealousy                                        |
| 30162 | Eu10513 | [X]Alcoholic paranoia                                        |
| 17607 | Eu10514 | [X]Alcoholic psychosis NOS                                   |
| 39799 | Eu10600 | [X]Mental and behav dis due to use alcohol: amnesic syndrome |
| 11670 | Eu10611 | [X]Korsakov's psychosis, alcohol induced                     |
| 62000 | Eu10700 | [X]Men & behav dis due alcoh: resid & late-onset psychot dis |
| 26323 | Eu10711 | [X]Alcoholic dementia NOS                                    |
| 37691 | Eu10712 | [X]Chronic alcoholic brain syndrome                          |

|        |         |                                                               |
|--------|---------|---------------------------------------------------------------|
| 32927  | Eu10800 | [X]Alcohol withdrawal-induced seizure                         |
| 45169  | Eu10y00 | [X]Men & behav dis due to use alcohol: oth men & behav dis    |
| 64389  | Eu10z00 | [X]Ment & behav dis due use alcohol: unsp ment & behav dis    |
| 47555  | F11x000 | Cerebral degeneration due to alcoholism                       |
| 36748  | F11x011 | Alcoholic encephalopathy                                      |
| 33839  | F144000 | Cerebellar ataxia due to alcoholism                           |
| 30604  | F25B.00 | Alcohol-induced epilepsy                                      |
| 2925   | F375.00 | Alcoholic polyneuropathy                                      |
| 31742  | F394100 | Alcoholic myopathy                                            |
| 4915   | G555.00 | Alcoholic cardiomyopathy                                      |
| 8363   | G852300 | Oesophageal varices in alcoholic cirrhosis of the liver       |
| 4506   | J153.00 | Alcoholic gastritis                                           |
| 10691  | J610.00 | Alcoholic fatty liver                                         |
| 3216   | J611.00 | Acute alcoholic hepatitis                                     |
| 4743   | J612.00 | Alcoholic cirrhosis of liver                                  |
| 21713  | J612000 | Alcoholic fibrosis and sclerosis of liver                     |
| 7885   | J613.00 | Alcoholic liver damage unspecified                            |
| 17330  | J613000 | Alcoholic hepatic failure                                     |
| 7943   | J617.00 | Alcoholic hepatitis                                           |
| 7602   | J617000 | Chronic alcoholic hepatitis                                   |
| 9169   | R103.00 | [D]Alcohol blood level excessive                              |
| 36499  | SM0z.00 | Alcohol causing toxic effect NOS                              |
| 59448  | U8...00 | [X]Supplem factr relat to caus morbid+mortal classf elsewhere |
| 44019  | U80..00 | [X]Evidence of alcohl involv determin by blood alcohl level   |
| 12950  | U800.00 | [X]Eviden of alcohl involv blood alcohl level <20 mg/100 ml   |
| 57202  | U801.00 | [X]Eviden of alcohl involv blood alcohl level 20-39mg/100ml   |
| 59079  | U802.00 | [X]Eviden of alcohl involv blood alcohl level 40-59mg/100ml   |
| 57242  | U803.00 | [X]Eviden of alcohl involv blood alcohl level 60-79mg/100ml   |
| 53428  | U804.00 | [X]Eviden of alcohl involv blood alcohl level 80-99mg/100ml   |
| 54504  | U805.00 | [X]Eviden of alcoh involv blood alcoh level 100-119mg/100ml   |
| 32454  | U806.00 | [X]Eviden of alcoh involv blood alcoh level 120-199mg/100ml   |
| 47907  | U807.00 | [X]Eviden of alcoh involv blood alcoh level 200-239mg/100ml   |
| 39726  | U808.00 | [X]Eviden alcoh involv blood alcoh level 240mg/100ml or more  |
| 103698 | U80z.00 | [X]Evid alcoh invol detrm by pres alcoh in bld levl not spec  |

|        |         |                                                              |
|--------|---------|--------------------------------------------------------------|
| 23978  | U81..00 | [X]Evid of alcohol involv determind by level of intoxication |
| 105273 | U810.00 | [X]Evid alcoh invol determ by levl of intox mild alcoh intox |
| 73480  | U811.00 | [X]Evid alcoh invol determ by level of intox mod alcoh intox |
| 44686  | U812.00 | [X]Evid alcoh invol determ by level of intox sev alcoh intox |
| 39738  | U813.00 | [X]Evid alcoh invl determ by levl intox very sev alcoh intox |
| 50625  | U814.00 | [X]Evid alch invl detrm by levl intox alch invl not oth spec |

NOS, not otherwise specified.

### Diabetes mellitus

| Medcode | Read code | Read term                                             |
|---------|-----------|-------------------------------------------------------|
| 506     | C100112   | Non-insulin dependent diabetes mellitus               |
| 608     | 66A2.00   | Follow-up diabetic assessment                         |
| 711     | C10..00   | Diabetes mellitus                                     |
| 758     | C10F.00   | Type 2 diabetes mellitus                              |
| 1038    | C100011   | Insulin dependent diabetes mellitus                   |
| 1323    | F420.00   | Diabetic retinopathy                                  |
| 1407    | C10FJ00   | Insulin treated type 2 diabetes mellitus              |
| 1549    | C10E.00   | Type 1 diabetes mellitus                              |
| 1647    | C108.00   | Insulin dependent diabetes mellitus                   |
| 1682    | C101.00   | Diabetes mellitus with ketoacidosis                   |
| 1684    | 66A4.00   | Diabetic on oral treatment                            |
| 1789    | R105712   | [d]Hyperglycaemia                                     |
| 2340    | F381311   | Diabetic amyotrophy                                   |
| 2342    | F372.12   | Diabetic neuropathy                                   |
| 2378    | 66AJ.00   | Diabetic - poor control                               |
| 2379    | 9N1Q.00   | Seen in diabetic clinic                               |
| 2471    | K01x100   | Nephrotic syndrome in diabetes mellitus               |
| 2475    | C104.11   | Diabetic nephropathy                                  |
| 2478    | 66AJ100   | Brittle diabetes                                      |
| 2986    | F420200   | Preproliferative diabetic retinopathy                 |
| 3286    | F420100   | Proliferative diabetic retinopathy                    |
| 3550    | 66A..00   | Diabetic monitoring                                   |
| 3837    | F420400   | Diabetic maculopathy                                  |
| 4513    | C109.00   | Non-insulin dependent diabetes mellitus               |
| 5002    | F372.11   | Diabetic polyneuropathy                               |
| 5884    | C109.11   | NIDDM - non-insulin dependent diabetes mellitus       |
| 6125    | 66AS.00   | Diabetic annual review                                |
| 6430    | 9NM0.00   | Attending diabetes clinic                             |
| 6509    | C108700   | Insulin-dependent diabetes mellitus with retinopathy  |
| 6791    | C108800   | Insulin-dependent diabetes mellitus - poor control    |
| 6813    | 1434.00   | h/o: diabetes mellitus                                |
| 7045    | 14F4.00   | h/o: admission in last year for diabetes foot problem |
| 7059    | 8H2J.00   | Admit diabetic emergency                              |
| 7069    | F420000   | Background diabetic retinopathy                       |
| 7328    | M037200   | Cellulitis in diabetic foot                           |
| 7563    | 66A3.00   | Diabetic on diet only                                 |

|       |         |                                                             |
|-------|---------|-------------------------------------------------------------|
| 7777  | 8H4F.00 | Referral to diabetologist                                   |
| 7795  | C106.12 | Diabetes mellitus with neuropathy                           |
| 8306  | 8H7f.00 | Referral to diabetes nurse                                  |
| 8403  | C109700 | Non-insulin dependent diabetes mellitus - poor control      |
| 8414  | 8CA4100 | Pt advised re diabetic diet                                 |
| 8618  | ZLA2500 | Seen by diabetic liaison nurse                              |
| 8836  | 66AR.00 | Diabetes management plan given                              |
| 8842  | 66A5.00 | Diabetic on insulin                                         |
| 9013  | 66AJ.11 | Unstable diabetes                                           |
| 9145  | 9N4I.00 | DNA- did not attend diabetic clinic                         |
| 9310  | Ryu8A00 | [x]Hyperglycaemia, unspecified                              |
| 9835  | 2BBL.00 | o/e - diabetic maculopathy present both eyes                |
| 9881  | M271200 | Mixed diabetic ulcer - foot                                 |
| 9897  | 9OL..00 | Diabetes monitoring admin.                                  |
| 9958  | 42W..00 | hb. a1c - diabetic control                                  |
| 9974  | 9N1v.00 | Seen in diabetic eye clinic                                 |
| 10098 | C10yy00 | Other specified diabetes mellitus with other spec comps     |
| 10099 | F420300 | Advanced diabetic maculopathy                               |
| 10418 | C10ED00 | Type 1 diabetes mellitus with nephropathy                   |
| 10642 | ZC2C800 | Dietary advice for diabetes mellitus                        |
| 10659 | F464000 | Diabetic cataract                                           |
| 10692 | C10EM00 | Type 1 diabetes mellitus with ketoacidosis                  |
| 10755 | F420600 | Non proliferative diabetic retinopathy                      |
| 10824 | 9N1i.00 | Seen in diabetic foot clinic                                |
| 10977 | 66Ac.00 | Diabetic peripheral neuropathy screening                    |
| 11018 | 8HBG.00 | Diabetic retinopathy 12 month review                        |
| 11041 | 9h41.00 | Excepted from diabetes qual indicators: patient unsuitable  |
| 11047 | 66AH000 | Conversion to insulin                                       |
| 11050 | 44Uz.11 | Blood hyperglycaemia nos                                    |
| 11094 | 9NND.00 | Under care of diabetic foot screener                        |
| 11129 | 2BBQ.00 | o/e - left eye background diabetic retinopathy              |
| 11348 | 9h42.00 | Excepted from diabetes quality indicators: informed dissent |
| 11433 | 2BBP.00 | o/e - right eye background diabetic retinopathy             |
| 11471 | 8B3I.00 | Diabetes medication review                                  |
| 11551 | C10B.00 | Diabetes mellitus induced by steroids                       |
| 11599 | 7276.00 | Pan retinal photocoagulation for diabetes                   |
| 11626 | F420z00 | Diabetic retinopathy nos                                    |
| 11663 | M271100 | Neuropathic diabetic ulcer - foot                           |
| 11677 | 8H7r.00 | Refer to diabetic foot screener                             |
| 11848 | C314.11 | Renal diabetes                                              |
| 11930 | 9NN9.00 | Under care of diabetes specialist nurse                     |
| 11977 | ZL62500 | Referral to diabetes nurse                                  |
| 12030 | 9OL6.00 | Diabetes monitoring 3rd letter                              |
| 12213 | 8BL2.00 | Patient on maximal tolerated therapy for diabetes           |
| 12225 | 8H7C.00 | Refer, diabetic liaison nurse                               |
| 12247 | 8I6G.00 | Diabetic foot examination not indicated                     |

|       |         |                                                            |
|-------|---------|------------------------------------------------------------|
| 12262 | 8I3X.00 | Diabetic retinopathy screening refused                     |
| 12307 | 66AU.00 | Diabetes care by hospital only                             |
| 12455 | C10E.11 | Type 1 diabetes mellitus                                   |
| 12483 | 8CAQ.00 | Advice about blood glucose control                         |
| 12506 | 66AP.00 | Diabetes: practice programme                               |
| 12507 | 9N2i.00 | Seen by diabetic liaison nurse                             |
| 12640 | C10FC00 | Type 2 diabetes mellitus with nephropathy                  |
| 12675 | 66AQ.00 | Diabetes: shared care programme                            |
| 12682 | 679R.00 | Patient offered diabetes structured education programme    |
| 12703 | 3881.00 | Education score - diabetes                                 |
| 12736 | C10F500 | Type 2 diabetes mellitus with gangrene                     |
| 13036 | TJ23B00 | Adverse reaction to glucagon                               |
| 13057 | 679L.00 | Health education - diabetes                                |
| 13067 | 66AZ.00 | Diabetic monitoring nos                                    |
| 13069 | 66A8.00 | Has seen dietician - diabetes                              |
| 13070 | 66A1.00 | Initial diabetic assessment                                |
| 13071 | 66AI.00 | Diabetic - good control                                    |
| 13074 | 13B1.00 | Diabetic diet                                              |
| 13078 | 13AC.00 | Diabetic weight reducing diet                              |
| 13097 | 2BBT.00 | o/e - right eye proliferative diabetic retinopathy         |
| 13099 | 2BBR.00 | o/e - right eye preproliferative diabetic retinopathy      |
| 13100 | 2BBJ.00 | o/e - no right diabetic retinopathy                        |
| 13101 | 2BBV.00 | o/e - left eye proliferative diabetic retinopathy          |
| 13102 | 2BBW.00 | o/e - right eye diabetic maculopathy                       |
| 13103 | 2BBS.00 | o/e - left eye preproliferative diabetic retinopathy       |
| 13104 | 2BBK.00 | o/e - no left diabetic retinopathy                         |
| 13108 | 2BBX.00 | o/e - left eye diabetic maculopathy                        |
| 13191 | 9OL.11  | Diabetes clinic administration                             |
| 13192 | 9OLA.00 | Diabetes monitor. check done                               |
| 13193 | 66AC.00 | Blood sugar charts                                         |
| 13194 | 9OL4.00 | Diabetes monitoring 1st letter                             |
| 13195 | 9OL5.00 | Diabetes monitoring 2nd letter                             |
| 13196 | 66AD.00 | Fundoscopy - diabetic check                                |
| 13197 | 9OL1.00 | Attends diabetes monitoring                                |
| 13279 | C104y00 | Other specified diabetes mellitus with renal complications |
| 13291 | 66AE.00 | Feet examination                                           |
| 13597 | 42W1.00 | hb. a1c < 7% - good control                                |
| 13604 | 42W3.00 | hb. a1c > 10% - bad control                                |
| 13678 | ZL62600 | Referral to diabetic liaison nurse                         |
| 13833 | 44T9.00 | Glucometer blood sugar                                     |
| 14049 | 42WZ.00 | hb. a1c - diabetic control nos                             |
| 14050 | 42c.00  | hba1 - diabetic control                                    |
| 14803 | C100100 | Diabetes mellitus, adult onset, no mention of complication |
| 14889 | C100111 | Maturity onset diabetes                                    |
| 15690 | C103.00 | Diabetes mellitus with ketoacidotic coma                   |
| 16230 | C106.00 | Diabetes mellitus with neurological manifestation          |

|       |         |                                                           |
|-------|---------|-----------------------------------------------------------|
| 16490 | 66AH.00 | Diabetic treatment changed                                |
| 16491 | C106.13 | Diabetes mellitus with polyneuropathy                     |
| 16502 | C104.00 | Diabetes mellitus with renal manifestation                |
| 16881 | ZV65312 | [v]Dietary counselling in diabetes mellitus               |
| 16946 | 13L4.11 | Diabetic child                                            |
| 17067 | F171100 | Autonomic neuropathy due to diabetes                      |
| 17095 | 2G5A.00 | o/e - right diabetic foot at risk                         |
| 17236 | 14P3.00 | h/o: insulin therapy                                      |
| 17247 | F35z000 | Diabetic mononeuritis nos                                 |
| 17262 | C109600 | Non-insulin-dependent diabetes mellitus with retinopathy  |
| 17313 | F440700 | Diabetic iritis                                           |
| 17478 | 8A17.00 | Self monitoring of blood glucose                          |
| 17545 | C108F11 | Type i diabetes mellitus with diabetic cataract           |
| 17817 | 7L19800 | Subcutaneous injection of insulin                         |
| 17858 | C108.12 | Type 1 diabetes mellitus                                  |
| 17859 | C109.12 | Type 2 diabetes mellitus                                  |
| 17869 | 66AL.00 | Diabetic-uncooperative patient                            |
| 17886 | 66AM.00 | Diabetic - follow-up default                              |
| 18056 | 2G5C.00 | Foot abnormality - diabetes related                       |
| 18142 | N030000 | Diabetic cheiroarthropathy                                |
| 18143 | C109G11 | Type ii diabetes mellitus with arthropathy                |
| 18167 | 66AT.00 | Annual diabetic blood test                                |
| 18209 | C109012 | Type 2 diabetes mellitus with renal complications         |
| 18219 | C109.13 | Type ii diabetes mellitus                                 |
| 18230 | C108J12 | Type 1 diabetes mellitus with neuropathic arthropathy     |
| 18264 | C109J12 | Insulin treated type ii diabetes mellitus                 |
| 18278 | C109J00 | Insulin treated type 2 diabetes mellitus                  |
| 18311 | 68A7.00 | Diabetic retinopathy screening                            |
| 18387 | C10E700 | Type 1 diabetes mellitus with retinopathy                 |
| 18390 | C10FM00 | Type 2 diabetes mellitus with persistent microalbuminuria |
| 18396 | TJ23A00 | Adverse reaction to metformin hydrochloride               |
| 18425 | C10FB00 | Type 2 diabetes mellitus with polyneuropathy              |
| 18496 | C10F600 | Type 2 diabetes mellitus with retinopathy                 |
| 18505 | C108.11 | IDDM-insulin dependent diabetes mellitus                  |
| 18642 | C10EH00 | Type 1 diabetes mellitus with arthropathy                 |
| 18662 | 8HBH.00 | Diabetic retinopathy 6 month review                       |
| 18683 | C10E500 | Type 1 diabetes mellitus with ulcer                       |
| 18747 | 8I6F.00 | Diabetic retinopathy screening not indicated              |
| 18777 | C10F000 | Type 2 diabetes mellitus with renal complications         |
| 18824 | 8I3W.00 | Diabetic foot examination declined                        |
| 19381 | 8HTk.00 | Referral to diabetic eye clinic                           |
| 19739 | 68A9.00 | Diabetic retinopathy screening offered                    |
| 20696 | 66AA.11 | Injection sites - diabetic                                |
| 20900 | 9OLA.11 | Diabetes monitored                                        |
| 21420 | 66AJ200 | Loss of hypoglycaemic warning                             |
| 21482 | C102.00 | Diabetes mellitus with hyperosmolar coma                  |

|       |         |                                                              |
|-------|---------|--------------------------------------------------------------|
| 21689 | 13AB.00 | Diabetic lipid lowering diet                                 |
| 21983 | C108012 | Type 1 diabetes mellitus with renal complications            |
| 22023 | 66AJz00 | Diabetic - poor control nos                                  |
| 22130 | 9OL3.00 | Diabetes monitoring default                                  |
| 22305 | TJ23400 | Adverse reaction to gliclazide                               |
| 22487 | C10N.00 | Secondary diabetes mellitus                                  |
| 22507 | 8I7B.00 | Metformin not tolerated                                      |
| 22573 | C106z00 | Diabetes mellitus nos with neurological manifestation        |
| 22823 | 66Ab.00 | Diabetic foot examination                                    |
| 22871 | C10EP00 | Type 1 diabetes mellitus with exudative maculopathy          |
| 22884 | C10F.11 | Type ii diabetes mellitus                                    |
| 22959 | 66AJ000 | Chronic hyperglycaemia                                       |
| 22967 | 2BBF.00 | Retinal abnormality - diabetes related                       |
| 23479 | C350011 | Bronzed diabetes                                             |
| 24327 | M271000 | Ischaemic ulcer diabetic foot                                |
| 24363 | 8A13.00 | Diabetic stabilisation                                       |
| 24423 | C108.13 | Type i diabetes mellitus                                     |
| 24458 | C109711 | Type ii diabetes mellitus - poor control                     |
| 24490 | C100000 | Diabetes mellitus, juvenile type, no mention of complication |
| 24571 | F372200 | Asymptomatic diabetic neuropathy                             |
| 24693 | C109G00 | Non-insulin dependent diabetes mellitus with arthropathy     |
| 24694 | C108B00 | Insulin dependent diabetes mellitus with mononeuropathy      |
| 24836 | C109C12 | Type 2 diabetes mellitus with nephropathy                    |
| 25041 | ZC2CA00 | Dietary advice for type ii diabetes                          |
| 25044 | 44UZ.00 | Blood glucose 14+ mmol/l                                     |
| 25591 | C10FQ00 | Type 2 diabetes mellitus with exudative maculopathy          |
| 25627 | C10F700 | Type 2 diabetes mellitus - poor control                      |
| 25636 | 66Aa.00 | Diabetic diet - poor compliance                              |
| 26054 | C10FL00 | Type 2 diabetes mellitus with persistent proteinuria         |
| 26108 | C10B000 | Steroid induced diabetes mellitus without complication       |
| 26485 | U60231C | [x] Adverse reaction to metformin hydrochloride              |
| 26603 | 9OL2.00 | Refuses diabetes monitoring                                  |
| 26604 | 66AY.00 | Diabetic diet - good compliance                              |
| 26605 | 9OLB.00 | Attended diabetes structured education programme             |
| 26664 | 2G5B.00 | o/e - left diabetic foot at risk                             |
| 26666 | 2G5E.00 | o/e - right diabetic foot at low risk                        |
| 26667 | 2G5I.00 | o/e - left diabetic foot at low risk                         |
| 26855 | C108400 | Unstable insulin dependent diabetes mellitus                 |
| 27891 | N030100 | Diabetic charcot arthropathy                                 |
| 27921 | 2G51000 | Foot abnormality - diabetes related                          |
| 28574 | 9h4..00 | Exception reporting: diabetes quality indicators             |
| 28769 | 66AV.00 | Diabetic on insulin and oral treatment                       |
| 28856 | 8CP2.00 | Transition of diabetes care options discussed                |
| 28873 | 66Ai.00 | Diabetic 6 month review                                      |
| 29041 | 66AN.00 | Date diabetic treatment start                                |
| 29218 | 42W2.00 | hb. a1c 7-10% - borderline                                   |



|       |         |                                                              |
|-------|---------|--------------------------------------------------------------|
| 29979 | C109900 | Non-insulin-dependent diabetes mellitus without complication |
| 30247 | TJ23000 | Adverse reaction to insulins                                 |
| 30294 | C10EL00 | Type 1 diabetes mellitus with persistent microalbuminuria    |
| 30323 | C10EK00 | Type 1 diabetes mellitus with persistent proteinuria         |
| 30477 | F420700 | High risk proliferative diabetic retinopathy                 |
| 30648 | 9N4p.00 | Did not attend diabetic retinopathy clinic                   |
| 31053 | R054300 | [d] Widespread diabetic foot gangrene                        |
| 31141 | 9OL8.00 | Diabetes monitor.phone invite                                |
| 31156 | 2G5J.00 | o/e - left diabetic foot at moderate risk                    |
| 31157 | 2G5F.00 | o/e - right diabetic foot at moderate risk                   |
| 31171 | 2G5G.00 | o/e - right diabetic foot at high risk                       |
| 31172 | 2G5K.00 | o/e - left diabetic foot at high risk                        |
| 31240 | 9OL7.00 | Diabetes monitor.verbal invite                               |
| 31241 | 9OLZ.00 | Diabetes monitoring admin.nos                                |
| 31310 | C108900 | Insulin dependent diabetes maturity onset                    |
| 31529 | U602300 | [x] Insul/oral hypoglyc drugs caus adverse eff therapeut use |
| 31715 | U602315 | [x] Adverse reaction to glibenclamide                        |
| 31790 | F372.00 | Polyneuropathy in diabetes                                   |
| 32193 | C11y000 | Steroid induced diabetes                                     |
| 32359 | ZRbH.00 | Perceived control of insulin-dependent diabetes              |
| 32403 | C107.11 | Diabetes mellitus with gangrene                              |
| 32556 | C107.12 | Diabetes with gangrene                                       |
| 32619 | 66Af.00 | Patient diabetes education review                            |
| 32627 | C10FN00 | Type 2 diabetes mellitus with ketoacidosis                   |
| 32739 | 9N0n.00 | Seen in community diabetes specialist clinic                 |
| 32770 | 44V3.00 | Glucose tol. Test diabetic                                   |
| 33254 | C105.00 | Diabetes mellitus with ophthalmic manifestation              |
| 33343 | C10y.00 | Diabetes mellitus with other specified manifestation         |
| 33807 | C107200 | Diabetes mellitus, adult with gangrene                       |
| 34152 | G73y000 | Diabetic peripheral angiopathy                               |
| 34268 | C10F200 | Type 2 diabetes mellitus with neurological complications     |
| 34283 | C105z00 | Diabetes mellitus nos with ophthalmic manifestation          |
| 34450 | C10FK00 | Hyperosmolar non-ketotic state in type 2 diabetes mellitus   |
| 34528 | 3882.00 | Diabetes well being questionnaire                            |
| 34541 | 8HVU.00 | Private referral to diabetologist                            |
| 34912 | C109400 | Non-insulin dependent diabetes mellitus with ulcer           |
| 35105 | C104100 | Diabetes mellitus, adult onset, with renal manifestation     |
| 35107 | C104z00 | Diabetes mellitus with nephropathy nos                       |
| 35116 | 2G5L.00 | o/e - left diabetic foot - ulcerated                         |
| 35288 | C10E800 | Type 1 diabetes mellitus - poor control                      |
| 35316 | 2G5H.00 | o/e - right diabetic foot - ulcerated                        |
| 35321 | 8H3O.00 | Non-urgent diabetic admission                                |
| 35383 | 9OLD.00 | Diabetic patient unsuitable for digital retinal photography  |
| 35385 | C10FH00 | Type 2 diabetes mellitus with neuropathic arthropathy        |
| 35399 | C107.00 | Diabetes mellitus with peripheral circulatory disorder       |

|       |         |                                                                |
|-------|---------|----------------------------------------------------------------|
| 35785 | F372100 | Chronic painful diabetic neuropathy                            |
| 36633 | C109K00 | Hyperosmolar non-ketotic state in type 2 diabetes mellitus     |
| 36669 | 66b1.00 | Diabetic monitoring not required                               |
| 36695 | C10D.00 | Diabetes mellitus autosomal dominant type 2                    |
| 36798 | 7L10000 | Continuous subcutaneous infusion of insulin                    |
| 37035 | 66Ae.00 | hba1c target                                                   |
| 37315 | F3y0.00 | Diabetic mononeuropathy                                        |
| 37648 | C109J11 | Insulin treated non-insulin dependent diabetes mellitus        |
| 37806 | C10FF00 | Type 2 diabetes mellitus with peripheral angiopathy            |
| 38076 | M21yC00 | Insulin lipohypertrophy                                        |
| 38078 | 66A9.00 | Understands diet - diabetes                                    |
| 38103 | 9N0m.00 | Seen in diabetic nurse consultant clinic                       |
| 38129 | 9N0o.00 | Seen in community diabetic specialist nurse clinic             |
| 38130 | ZRB6.00 | Diabetes wellbeing questionnaire                               |
| 38161 | C108711 | Type i diabetes mellitus with retinopathy                      |
| 38617 | C101y00 | Other specified diabetes mellitus with ketoacidosis            |
| 38986 | C100.00 | Diabetes mellitus with no mention of complication              |
| 39070 | C10EE00 | Type 1 diabetes mellitus with hypoglycaemic coma               |
| 39317 | C106100 | Diabetes mellitus, adult onset, + neurological manifestation   |
| 39420 | F381300 | Myasthenic syndrome due to diabetic amyotrophy                 |
| 39809 | C108J00 | Insulin dependent diab mell with neuropathic arthropathy       |
| 40023 | C102000 | Diabetes mellitus, juvenile type, with hyperosmolar coma       |
| 40401 | C109500 | Non-insulin dependent diabetes mellitus with gangrene          |
| 40463 | 42c1.00 | hba1 7 - 10% - borderline control                              |
| 40682 | C10E900 | Type 1 diabetes mellitus maturity onset                        |
| 40837 | C10EN00 | Type 1 diabetes mellitus with ketoacidotic coma                |
| 40962 | C109H00 | Non-insulin dependent d m with neuropathic arthropathy         |
| 41049 | C108712 | Type 1 diabetes mellitus with retinopathy                      |
| 41389 | C105100 | Diabetes mellitus, adult onset, + ophthalmic manifestation     |
| 41686 | Cyu2000 | [x] Other specified diabetes mellitus                          |
| 41716 | C108C00 | Insulin dependent diabetes mellitus with polyneuropathy        |
| 42360 | 42c0.00 | hba1 < 7% - good control                                       |
| 42505 | C101z00 | Diabetes mellitus nos with ketoacidosis                        |
| 42567 | C103000 | Diabetes mellitus, juvenile type, with ketoacidotic coma       |
| 42729 | C108E11 | Type i diabetes mellitus with hypoglycaemic coma               |
| 42762 | C109612 | Type 2 diabetes mellitus with retinopathy                      |
| 42831 | C10E200 | Type 1 diabetes mellitus with neurological complications       |
| 43139 | C102100 | Diabetes mellitus, adult onset, with hyperosmolar coma         |
| 43227 | C10F311 | Type ii diabetes mellitus with multiple complications          |
| 43453 | C10C.00 | Diabetes mellitus autosomal dominant                           |
| 43493 | M21yC11 | Insulin site lipohypertrophy                                   |
| 43785 | C109D00 | Non-insulin dependent diabetes mellitus with hypoglyca<br>coma |
| 43857 | C10M.00 | Lipoatrophic diabetes mellitus                                 |
| 43921 | C10E400 | Unstable type 1 diabetes mellitus                              |
| 43951 | 66AK.00 | Diabetic - cooperative patient                                 |

|       |         |                                                              |
|-------|---------|--------------------------------------------------------------|
| 44033 | F345000 | Diabetic mononeuritis multiplex                              |
| 44260 | C108F00 | Insulin dependent diabetes mellitus with diabetic cataract   |
| 44312 | 9M10.00 | Informed dissent for diabetes national audit                 |
| 44440 | C108E00 | Insulin dependent diabetes mellitus with hypoglycaemic coma  |
| 44443 | C108500 | Insulin dependent diabetes mellitus with ulcer               |
| 44779 | C109E12 | Type 2 diabetes mellitus with diabetic cataract              |
| 44982 | C10FE00 | Type 2 diabetes mellitus with diabetic cataract              |
| 45250 | ZL22500 | Under care of diabetic liaison nurse                         |
| 45276 | C10E312 | Insulin dependent diabetes mellitus with multiple complicat  |
| 45467 | C109B00 | Non-insulin dependent diabetes mellitus with polyneuropathy  |
| 45491 | C10z.00 | Diabetes mellitus with unspecified complication              |
| 45499 | K01x111 | Kimmelstiel - wilson disease                                 |
| 45913 | C109712 | Type 2 diabetes mellitus - poor control                      |
| 45914 | C108812 | Type 1 diabetes mellitus - poor control                      |
| 45919 | C109212 | Type 2 diabetes mellitus with neurological complications     |
| 46079 | 42c2.00 | hba1 > 10% - bad control                                     |
| 46150 | C109512 | Type 2 diabetes mellitus with gangrene                       |
| 46290 | C108y00 | Other specified diabetes mellitus with multiple comps        |
| 46301 | C10EC00 | Type 1 diabetes mellitus with polyneuropathy                 |
| 46521 | 9N2d.00 | Seen by diabetologist                                        |
| 46624 | C10C.11 | Maturity onset diabetes in youth                             |
| 46850 | C108811 | Type i diabetes mellitus - poor control                      |
| 46917 | C10FD00 | Type 2 diabetes mellitus with hypoglycaemic coma             |
| 46963 | C108000 | Insulin-dependent diabetes mellitus with renal complications |
| 47011 | 8Hj0.00 | Referral to diabetes structured education programme          |
| 47032 | 8CS0.00 | Diabetes care plan agreed                                    |
| 47058 | 8Hg4.00 | Discharged from care of diabetes specialist nurse            |
| 47144 | 2BBM.00 | o/e - diabetic maculopathy absent both eyes                  |
| 47315 | C10F711 | Type ii diabetes mellitus - poor control                     |
| 47321 | C10F100 | Type 2 diabetes mellitus with ophthalmic complications       |
| 47328 | 2BBk.00 | o/e - right eye stable treated prolif diabetic retinopathy   |
| 47341 | 8A12.00 | Diabetic crisis monitoring                                   |
| 47370 | 8HLE.00 | Diabetology d.v. Done                                        |
| 47377 | C105y00 | Other specified diabetes mellitus with ophthalmic complicatn |
| 47409 | C109B11 | Type ii diabetes mellitus with polyneuropathy                |
| 47582 | C10E000 | Type 1 diabetes mellitus with renal complications            |
| 47584 | F420500 | Advanced diabetic retinal disease                            |
| 47649 | C10E100 | Type 1 diabetes mellitus with ophthalmic complications       |
| 47650 | C10E300 | Type 1 diabetes mellitus with multiple complications         |
| 47816 | C109H11 | Type ii diabetes mellitus with neuropathic arthropathy       |
| 47954 | C10F900 | Type 2 diabetes mellitus without complication                |
| 48078 | F372000 | Acute painful diabetic neuropathy                            |
| 48192 | C109E11 | Type ii diabetes mellitus with diabetic cataract             |
| 48310 | ZV6DA00 | [v] Admitted for commencement of insulin                     |

|       |         |                                                                |
|-------|---------|----------------------------------------------------------------|
| 49074 | C10F400 | Type 2 diabetes mellitus with ulcer                            |
| 49146 | C108211 | Type i diabetes mellitus with neurological complications       |
| 49276 | C108100 | Insulin-dependent diabetes mellitus with ophthalmic comps      |
| 49554 | C10EF00 | Type 1 diabetes mellitus with diabetic cataract                |
| 49640 | 2G5W.00 | o/e - left chronic diabetic foot ulcer                         |
| 49655 | C10F611 | Type ii diabetes mellitus with retinopathy                     |
| 49686 | TJ23900 | Adverse reaction to tolbutamide                                |
| 49869 | C109G12 | Type 2 diabetes mellitus with arthropathy                      |
| 49884 | 6761.00 | Diabetic pre-pregnancy counselling                             |
| 49949 | C10E411 | Unstable type i diabetes mellitus                              |
| 50175 | 66AW.00 | Diabetic foot risk assessment                                  |
| 50225 | C109011 | Type ii diabetes mellitus with renal complications             |
| 50429 | C109100 | Non-insulin-dependent diabetes mellitus with ophthalm<br>comps |
| 50527 | C10FB11 | Type ii diabetes mellitus with polyneuropathy                  |
| 50609 | L180600 | Pre-existing diabetes mellitus, non-insulin-dependent          |
| 50813 | C109A11 | Type ii diabetes mellitus with mononeuropathy                  |
| 50937 | 8HTe.00 | Referral to diabetes preconception counselling clinic          |
| 50960 | L180500 | Pre-existing diabetes mellitus, insulin-dependent              |
| 50972 | C100z00 | Diabetes mellitus nos with no mention of complication          |
| 51261 | C10E.12 | Insulin dependent diabetes mellitus                            |
| 51697 | C10G.00 | Secondary pancreatic diabetes mellitus                         |
| 51756 | C10FP00 | Type 2 diabetes mellitus with ketoacidotic coma                |
| 51939 | ZV6DB00 | [v] Admitted for conversion to insulin                         |
| 51957 | C108511 | Type i diabetes mellitus with ulcer                            |
| 52041 | 2BB1.00 | o/e - left eye stable treated prolif diabetic retinopathy      |
| 52104 | C108300 | Insulin dependent diabetes mellitus with multiple complicatn   |
| 52212 | Cyu2.00 | [x] Diabetes mellitus                                          |
| 52237 | 9360.00 | Patient held diabetic record issued                            |
| 52283 | C108200 | Insulin-dependent diabetes mellitus with neurological comps    |
| 52303 | C109000 | Non-insulin-dependent diabetes mellitus with renal comps       |
| 52630 | 2BBo.00 | o/e - sight threatening diabetic retinopathy                   |
| 53200 | C101000 | Diabetes mellitus, juvenile type, with ketoacidosis            |
| 53238 | 66AG.00 | Diabetic drug side effects                                     |
| 53392 | C10F911 | Type ii diabetes mellitus without complication                 |
| 53630 | C110.11 | Insulin coma                                                   |
| 53634 | R054200 | [d] Gangrene of toe in diabetic                                |
| 54008 | C10EJ00 | Type 1 diabetes mellitus with neuropathic arthropathy          |
| 54212 | C109F00 | Non-insulin-dependent d m with peripheral angiopath            |
| 54600 | C10E412 | Unstable insulin dependent diabetes mellitus                   |
| 54601 | 9NN8.00 | Under care of diabetologist                                    |
| 54846 | 9OL9.00 | Diabetes monitoring deleted                                    |
| 54856 | C101100 | Diabetes mellitus, adult onset, with ketoacidosis              |
| 54899 | C109F11 | Type ii diabetes mellitus with peripheral angiopathy           |
| 55075 | C109411 | Type ii diabetes mellitus with ulcer                           |
| 55239 | C10EQ00 | Type 1 diabetes mellitus with gastroparesis                    |

|       |         |                                                             |
|-------|---------|-------------------------------------------------------------|
| 55431 | L180X00 | Pre-existing diabetes mellitus, unspecified                 |
| 55842 | C109200 | Non-insulin-dependent diabetes mellitus with neuro comps    |
| 56268 | C109D11 | Type ii diabetes mellitus with hypoglycaemic coma           |
| 56448 | C108A00 | Insulin-dependent diabetes without complication             |
| 56803 | C107400 | NIDDM with peripheral circulatory disorder                  |
| 57278 | C10F011 | Type ii diabetes mellitus with renal complications          |
| 57333 | N030011 | Diabetic cheiroopathy                                       |
| 57356 | TJ23300 | Adverse reaction to glibenclamide                           |
| 57389 | 93C4.00 | Patient consent given for addition to diabetic register     |
| 57621 | C108D00 | Insulin dependent diabetes mellitus with nephropathy        |
| 57723 | 8HHy.00 | Referral to diabetic register                               |
| 58133 | ZLD7500 | Discharge by diabetic liaison nurse                         |
| 58159 | 8I3k.00 | Insulin therapy declined                                    |
| 58604 | C109611 | Type ii diabetes mellitus with retinopathy                  |
| 58639 | 8I57.00 | Patient held diabetic record declined                       |
| 59253 | C10FG00 | Type 2 diabetes mellitus with arthropathy                   |
| 59288 | C103y00 | Other specified diabetes mellitus with coma                 |
| 59365 | C109C00 | Non-insulin dependent diabetes mellitus with nephropathy    |
| 59725 | C109111 | Type ii diabetes mellitus with ophthalmic complications     |
| 59903 | C106.11 | Diabetic amyotrophy                                         |
| 59991 | C10D.11 | Maturity onset diabetes in youth type 2                     |
| 60107 | C108411 | Unstable type i diabetes mellitus                           |
| 60208 | C108J11 | Type i diabetes mellitus with neuropathic arthropathy       |
| 60499 | C108600 | Insulin dependent diabetes mellitus with gangrene           |
| 60699 | C109F12 | Type 2 diabetes mellitus with peripheral angiopathy         |
| 60796 | C10FL11 | Type ii diabetes mellitus with persistent proteinuria       |
| 61021 | 68AB.00 | Diabetic digital retinopathy screening offered              |
| 61071 | C109D12 | Type 2 diabetes mellitus with hypoglycaemic coma            |
| 61210 | TJ23z00 | Adverse reaction to insulins and antidiabetic agents nos    |
| 61344 | C108011 | Type i diabetes mellitus with renal complications           |
| 61461 | 9M00.00 | Informed consent for diabetes national audit                |
| 61470 | 66A1.00 | Diabetic monitoring - higher risk albumin excretion         |
| 61520 | C110000 | Iatrogenic hyperinsulinism                                  |
| 61523 | C106y00 | Other specified diabetes mellitus with neurological comps   |
| 61557 | 8HKE.00 | Diabetology d.v. Requested                                  |
| 61670 | 889A.00 | Diab mellit insulin-glucose infus acute myocardial infarct  |
| 61829 | C108212 | Type 1 diabetes mellitus with neurological complications    |
| 62107 | C109511 | Type ii diabetes mellitus with gangrene                     |
| 62146 | C109300 | Non-insulin-dependent diabetes mellitus with multiple comps |
| 62209 | C10EM11 | Type i diabetes mellitus with ketoacidosis                  |
| 62352 | C108H11 | Type i diabetes mellitus with arthropathy                   |
| 62384 | 2G5V.00 | o/e - right chronic diabetic foot ulcer                     |
| 62526 | U60231A | [x] Adverse reaction to tolazamide                          |
| 62613 | C10EA11 | Type i diabetes mellitus without complication               |
| 62674 | C10FA00 | Type 2 diabetes mellitus with mononeuropathy                |

|       |         |                                                              |
|-------|---------|--------------------------------------------------------------|
| 63017 | C108911 | Type i diabetes mellitus maturity onset                      |
| 63357 | C107100 | Diabetes mellitus, adult, + peripheral circulatory disorder  |
| 63364 | U602312 | [x] Adverse reaction to insulins                             |
| 63371 | C10y100 | Diabetes mellitus, adult, + other specified manifestation    |
| 63412 | 8CR2.00 | Diabetes clinical management plan                            |
| 63690 | C10FR00 | Type 2 diabetes mellitus with gastroparesis                  |
| 63762 | C10z100 | Diabetes mellitus, adult onset, + unspecified complication   |
| 64142 | 8H11.00 | Referral for diabetic retinopathy screening                  |
| 64283 | C10zy00 | Other specified diabetes mellitus with unspecified comps     |
| 64357 | C10zz00 | Diabetes mellitus nos with unspecified complication          |
| 64446 | C108G00 | Insulin dependent diab mell with peripheral angiopathy       |
| 64449 | C108z00 | Unspecified diabetes mellitus with multiple complications    |
| 64571 | C109C11 | Type ii diabetes mellitus with nephropathy                   |
| 64668 | C10FJ11 | Insulin treated type ii diabetes mellitus                    |
| 65025 | C107z00 | Diabetes mellitus nos with peripheral circulatory disorder   |
| 65062 | C103z00 | Diabetes mellitus nos with ketoacidotic coma                 |
| 65267 | C10F300 | Type 2 diabetes mellitus with multiple complications         |
| 65463 | F420800 | High risk non proliferative diabetic retinopathy             |
| 65616 | C108H00 | Insulin dependent diabetes mellitus with arthropathy         |
| 65684 | U602311 | [x] Adverse reaction to insulins and antidiabetic agents     |
| 65704 | C109412 | Type 2 diabetes mellitus with ulcer                          |
| 66145 | C10EN11 | Type i diabetes mellitus with ketoacidotic coma              |
| 66274 | 66Ah.00 | Insulin needles changed for each injection                   |
| 66475 | 66Ak.00 | Diabetic monitoring - lower risk albumin excretion           |
| 66689 | U602316 | [x] Adverse reaction to gliclazide                           |
| 66872 | C108D11 | Type i diabetes mellitus with nephropathy                    |
| 66946 | TJ23800 | Adverse reaction to tolazamide                               |
| 66965 | C109H12 | Type 2 diabetes mellitus with neuropathic arthropathy        |
| 67664 | ZRBa.00 | Education score - diabetes                                   |
| 67853 | C106000 | Diabetes mellitus, juvenile, + neurological manifestation    |
| 67905 | C109211 | Type ii diabetes mellitus with neurological complications    |
| 68105 | C10EB00 | Type 1 diabetes mellitus with mononeuropathy                 |
| 68390 | C108512 | Type 1 diabetes mellitus with ulcer                          |
| 68546 | ZRB4.00 | Diabetes clinic satisfaction questionnaire                   |
| 68792 | C10z000 | Diabetes mellitus, juvenile type, + unspecified complication |
| 68818 | ZRB5.11 | DTSQ - diabetes treatment satisfaction questionnaire         |
| 68843 | C103100 | Diabetes mellitus, adult onset, with ketoacidotic coma       |
| 68928 | TJ23.00 | Adverse reaction to insulins and antidiabetic agents         |
| 69043 | ZC2C900 | Dietary advice for type i diabetes                           |
| 69124 | C107300 | IDDM with peripheral circulatory disorder                    |
| 69152 | 66Aj.00 | Insulin needles changed less than once a day                 |
| 69163 | 8HTi.00 | Referral to multidisciplinary diabetic clinic                |
| 69278 | C109E00 | Non-insulin depend diabetes mellitus with diabetic cataract  |
| 69676 | C10EA00 | Type 1 diabetes mellitus without complication                |
| 69748 | C105000 | Diabetes mellitus, juvenile type, + ophthalmic manifestation |
| 69993 | C10E600 | Type 1 diabetes mellitus with gangrene                       |

|       |         |                                                              |
|-------|---------|--------------------------------------------------------------|
| 70316 | C109112 | Type 2 diabetes mellitus with ophthalmic complications       |
| 70448 | C107000 | Diabetes mellitus, juvenile +peripheral circulatory disorder |
| 70766 | C108E12 | Type 1 diabetes mellitus with hypoglycaemic coma             |
| 70821 | C10yz00 | Diabetes mellitus nos with other specified manifestation     |
| 71476 | U602318 | [x] Adverse reaction to gliquidone                           |
| 71486 | TJ23200 | Adverse reaction to chlorpropamide                           |
| 72320 | C109A00 | Non-insulin dependent diabetes mellitus with mononeuropathy  |
| 72333 | 8HME.00 | Listed for diabetology admissn                               |
| 72345 | C102z00 | Diabetes mellitus nos with hyperosmolar coma                 |
| 72702 | C10E812 | Insulin dependent diabetes mellitus - poor control           |
| 82474 | 8Hl4.00 | Referral to community diabetes specialist nurse              |
| 83485 | 66Am.00 | Insulin dose changed                                         |
| 83532 | 66Ao.00 | Diabetes type 2 review                                       |
| 85660 | 66An.00 | Diabetes type 1 review                                       |
| 85991 | C10FM11 | Type ii diabetes mellitus with persistent microalbuminuria   |
| 88365 | 8I2S.00 | Glitazones contraindicated                                   |
| 89737 | TJ23500 | Adverse reaction to glipizide                                |
| 90301 | 66Ag.00 | Insulin needles changed daily                                |
| 91164 | ZRB4.11 | CSQ - diabetes clinic satisfaction questionnaire             |
| 91646 | C10F411 | Type ii diabetes mellitus with ulcer                         |
| 91942 | C10E311 | Type i diabetes mellitus with multiple complications         |
| 91943 | C10EC11 | Type i diabetes mellitus with polyneuropathy                 |
| 93380 | C10N100 | Cystic fibrosis related diabetes mellitus                    |
| 93390 | 9OLH.00 | Attended dafne diabetes structured education programme       |
| 93468 | C10EG00 | Type 1 diabetes mellitus with peripheral angiopathy          |
| 93491 | 9OLJ.00 | Dafne diabetes structured education programme completed      |
| 93529 | 9OLK.00 | Desmond diabetes structured education programme completed    |
| 93530 | 9OLE.00 | Attended desmond structured programme                        |
| 93631 | 9OLL.00 | Xpert diabetes structured education programme completed      |
| 93657 | 8Hj4.00 | Referral to desmond diabetes structured education programme  |
| 93704 | 8Hj3.00 | Referral to dafne diabetes structured education programme    |
| 93727 | C10FE11 | Type ii diabetes mellitus with diabetic cataract             |
| 93854 | 9OLM.00 | Diabetes structured education programme declined             |
| 93870 | 8Hj5.00 | Referral to xpert diabetes structured education programme    |
| 93875 | C10E712 | Insulin dependent diabetes mellitus with retinopathy         |
| 93878 | C10E511 | Type i diabetes mellitus with ulcer                          |
| 93922 | C104000 | Diabetes mellitus, juvenile type, with renal manifestation   |
| 94011 | 9OLG.00 | Attended xpert diabetes structured education programme       |
| 94067 | U602317 | [x] Adverse reaction to glipzide                             |
| 94186 | 9OLF.00 | Diabetes structured education programme completed            |
| 94330 | 8H4e.00 | Referral to diabetes special interest general practitioner   |
| 94383 | C10N000 | Secondary diabetes mellitus without complication             |
| 94647 | 9Oy..00 | Diabetes screening administration                            |

|        |         |                                                                   |
|--------|---------|-------------------------------------------------------------------|
| 94699  | ZRB5.00 | Diabetes treatment satisfaction questionnaire                     |
| 94955  | 9NiE.00 | Did not attend xpert diabetes structured education programme      |
| 94956  | 8I84.00 | Did not complete xpert diabetes structured education program      |
| 95093  | 8I83.00 | Did not complete desmond diabetes structured education program    |
| 95094  | 8I81.00 | Did not complete diabetes structured education programme          |
| 95159  | 9NiD.00 | Did not attend desmond diabetes structured education program      |
| 95343  | C10E711 | Type i diabetes mellitus with retinopathy                         |
| 95351  | C10FA11 | Type ii diabetes mellitus with mononeuropathy                     |
| 95539  | C10FS00 | Maternally inherited diabetes mellitus                            |
| 95553  | 9NiA.00 | Did not attend diabetes structured education programme            |
| 95636  | C10ER00 | Latent autoimmune diabetes mellitus in adult                      |
| 95813  | 9NiO.00 | Seen in multidisciplinary diabetic clinic                         |
| 95992  | C108A11 | Type i diabetes mellitus without complication                     |
| 95994  | 66Aq.00 | Diabetic foot screen                                              |
| 96010  | 66Ap.00 | Insulin treatment initiated                                       |
| 96116  | 8I2P.00 | Sulphonylureas contraindicated                                    |
| 96143  | 9kL..00 | Insulin initiation - enhanced services administration             |
| 96235  | C10E911 | Type i diabetes mellitus maturity onset                           |
| 96506  | C10G000 | Secondary pancreatic diabetes mellitus without complication       |
| 97281  | 9Ni4.00 | Seen by general practitioner special interest in diabetes         |
| 97446  | C108912 | Type 1 diabetes mellitus maturity onset                           |
| 97474  | C108412 | Unstable type 1 diabetes mellitus                                 |
| 97809  | 8I82.00 | Did not complete dafne diabetes structured education program      |
| 97824  | ZRB6.11 | DWBQ - diabetes wellbeing questionnaire                           |
| 97849  | C10E912 | Insulin dependent diabetes maturity onset                         |
| 97894  | C10EP11 | Type i diabetes mellitus with exudative maculopathy               |
| 98071  | C10E112 | Insulin-dependent diabetes mellitus with ophthalmic complications |
| 98392  | C10C.12 | Maturity onset diabetes in youth type 1                           |
| 98616  | C10F211 | Type ii diabetes mellitus with neurological complications         |
| 98704  | C10E512 | Insulin dependent diabetes mellitus with ulcer                    |
| 98723  | C10FD11 | Type ii diabetes mellitus with hypoglycaemic coma                 |
| 98954  | 3883.00 | Diabetes treatment satisfaction questionnaire                     |
| 99231  | C108B11 | Type i diabetes mellitus with mononeuropathy                      |
| 99277  | 9NiC.00 | Did not attend dafne diabetes structured education programme      |
| 99311  | C10E111 | Type i diabetes mellitus with ophthalmic complications            |
| 99628  | Kyu0300 | [x] Glomerular disorders in diabetes mellitus                     |
| 99716  | C10EE12 | Insulin dependent diabetes mellitus with hypoglycaemic coma       |
| 99719  | C10EA12 | Insulin-dependent diabetes without complication                   |
| 100032 | U60231B | [x] Adverse reaction to tolbutamide                               |



|        |         |                                                              |
|--------|---------|--------------------------------------------------------------|
| 100033 | U60231E | [x] Adverse reaction to insulins and antidiabetic agents nos |
| 100292 | Cyu2300 | [x] Unspecified diabetes mellitus with renal complications   |
| 100422 | 8HgC.00 | Discharged from diabetes shared care programme               |
| 100436 | 679L000 | Education in self management of diabetes                     |
| 100480 | 7L19J00 | Subcutaneous injection of exenatide                          |
| 100533 | 66AQ000 | Unsuitable for diabetes year of care programme               |
| 100770 | C10EF12 | Insulin dependent diabetes mellitus with diabetic cataract   |
| 100964 | C10F111 | Type ii diabetes mellitus with ophthalmic complications      |
| 101177 | 66At.00 | Diabetic dietary review                                      |
| 101190 | 66AQ100 | Declined consent for diabetes year of care programme         |
| 101311 | C10EC12 | Insulin dependent diabetes mellitus with polyneuropathy      |
| 101455 | 9OLN.00 | Diabetes monitor invitation by sms (short message service)   |
| 101456 | 8IAs.00 | Diabetic dietary review declined                             |
| 101728 | 66As.00 | Diabetic on subcutaneous treatment                           |
| 101735 | C10E212 | Insulin-dependent diabetes mellitus with neurological comps  |
| 101801 | 66At100 | Type ii diabetic dietary review                              |
| 101881 | 2BBr.00 | Impaired vision due to diabetic retinopathy                  |
| 102112 | C10E611 | Type i diabetes mellitus with gangrene                       |
| 102163 | C10ED12 | Insulin dependent diabetes mellitus with nephropathy         |
| 102201 | C10FC11 | Type ii diabetes mellitus with nephropathy                   |
| 102434 | 66Au.00 | Diabetic erectile dysfunction review                         |
| 102490 | 66Av.00 | Diabetic assessment of erectile dysfunction                  |
| 102549 | 66Aw.00 | Insulin dose                                                 |
| 102611 | 66At111 | Type 2 diabetic dietary review                               |
| 102620 | C10EL11 | Type i diabetes mellitus with persistent microalbuminuria    |
| 102704 | 66At000 | Type i diabetic dietary review                               |
| 102740 | C108112 | Type 1 diabetes mellitus with ophthalmic complications       |
| 102768 | 9NiZ.00 | Did not attend diabetes foot screening                       |
| 102946 | C10E012 | Insulin-dependent diabetes mellitus with renal complications |
| 103743 | 8IE2.00 | Diabetes care plan declined                                  |
| 103762 | 8BAi.00 | Insulin passport completed                                   |
| 103772 | 8CE0200 | Insulin passport given                                       |
| 103798 | 9b92000 | Diabetic medicine                                            |
| 103816 | 8CE0100 | Insulin alert patient information booklet given              |
| 103817 | 8BAj.00 | Informed dissent not to carry insulin passport               |
| 103834 | 8I7C.00 | Sulphonylureas not tolerated                                 |
| 103902 | C10FG11 | Type ii diabetes mellitus with arthropathy                   |
| 104254 | 7L10011 | Subcutaneous infusion with insulin pump                      |
| 104287 | 8Hlc.00 | Referral to community diabetes service                       |
| 104323 | C10F511 | Type ii diabetes mellitus with gangrene                      |
| 104374 | 67D8.00 | Provision of diabetes clinical summary                       |
| 104453 | 66At011 | Type 1 diabetic dietary review                               |
| 104639 | C10FF11 | Type ii diabetes mellitus with peripheral angiopathy         |
| 104858 | 8BAm.00 | Insulin passport checked                                     |
| 105207 | 8HTE100 | Referral to community diabetes clinic                        |
| 105302 | K08yA00 | Proteinuric diabetic nephropathy                             |

|        |         |                                                             |
|--------|---------|-------------------------------------------------------------|
| 105337 | C10E811 | Type i diabetes mellitus - poor control                     |
| 105446 | 679c.00 | Insulin administration education                            |
| 105585 | 8CMW700 | Diabetes clinical pathway                                   |
| 105740 | 2G5d.00 | o/e - left diabetic foot at increased risk                  |
| 105741 | 2G5e.00 | o/e - right diabetic foot at increased risk                 |
| 105784 | C109912 | Type 2 diabetes mellitus without complication               |
| 105937 | 8IEQ.00 | Referral to community diabetes specialist nurse declined    |
| 106061 | C10FP11 | Type ii diabetes mellitus with ketoacidotic coma            |
| 106218 | 9m0A.00 | Declined diabetic retinopathy screening                     |
| 106332 | 9m00.00 | Eligible for diabetic retinopathy screening                 |
| 106360 | K27y700 | Erectile dysfunction due to diabetes mellitus               |
| 106528 | C10FN11 | Type ii diabetes mellitus with ketoacidosis                 |
| 106679 | 8OA3.00 | Provision of written information about diabetes and driving |
| 106722 | 9Oy0300 | Diabetic foot screening invitation second letter            |
| 106723 | 9Oy0200 | Diabetic foot screening invitation first letter             |
| 106738 | 9Oy0000 | Diabetic foot screening invitation                          |
| 106953 | 8IEa.00 | Referral to dafne diabetes structured educn prog declined   |
| 107331 | 66AH100 | Conversion to insulin in secondary care                     |
| 107361 | 679L200 | Education about diabetes and driving                        |
| 107423 | 661N400 | Diabetes self-management plan review                        |
| 107452 | 66o..00 | Further diabetic monitoring                                 |
| 107464 | 66AS000 | Diabetes year of care annual review                         |
| 107508 | 66AH200 | Conversion to insulin by diabetes specialist nurse          |
| 107701 | C10FK11 | Hyperosmolar non-ketotic state in type ii diabetes mellitus |
| 107739 | 679L211 | Advice about diabetes and driving                           |
| 107793 | 9Oy0400 | Diabetic foot screening invitation third letter             |
| 107881 | K08yA11 | Clinical diabetic nephropathy                               |
| 108005 | C109312 | Type 2 diabetes mellitus with multiple complications        |
| 108007 | C108311 | Type i diabetes mellitus with multiple complications        |

HbA1c, glycated haemoglobin; h/o, history of; IDDM, insulin-dependent diabetes mellitus; NIDDM, non-insulin-dependent diabetes mellitus; NOS, not otherwise specified; o/e, on examination.



**Supplementary Table S3** Product codes for medication and management of gastroparesis*Metoclopramide*

| Product Code | Substance Name                                                      |
|--------------|---------------------------------------------------------------------|
| 179          | Metoclopramide hydrochloride                                        |
| 299          | Metoclopramide Hydrochloride                                        |
| 304          | Metoclopramide hydrochloride                                        |
| 405          | Metoclopramide hydrochloride                                        |
| 455          | Metoclopramide hydrochloride                                        |
| 511          | Metoclopramide hydrochloride                                        |
| 890          | Paracetamol/Metoclopramide hydrochloride                            |
| 892          | Metoclopramide hydrochloride/Paracetamol                            |
| 1724         | Metoclopramide hydrochloride                                        |
| 2306         | Metoclopramide hydrochloride/Paracetamol                            |
| 3155         | Metoclopramide Hydrochloride/Citric Acid/Sodium Bicarbonate/Aspirin |
| 3386         | Metoclopramide Hydrochloride/Citric Acid/Sodium Bicarbonate/Aspirin |
| 3514         | Paracetamol/Metoclopramide hydrochloride                            |
| 3716         | Metoclopramide hydrochloride                                        |
| 3726         | Metoclopramide Hydrochloride/Citric Acid/Sodium Bicarbonate/Aspirin |
| 4142         | Metoclopramide Hydrochloride                                        |
| 4892         | Metoclopramide hydrochloride                                        |
| 5081         | Metoclopramide hydrochloride                                        |
| 5288         | Aspirin DL-Lysine/Metoclopramide hydrochloride                      |
| 6521         | Metoclopramide Hydrochloride                                        |
| 8273         | Metoclopramide hydrochloride                                        |
| 8386         | Metoclopramide hydrochloride                                        |
| 8525         | Metoclopramide hydrochloride                                        |
| 8784         | Metoclopramide hydrochloride                                        |
| 9118         | Metoclopramide hydrochloride                                        |
| 11576        | Metoclopramide hydrochloride                                        |
| 12778        | Metoclopramide Hydrochloride/Paracetamol                            |
| 12869        | Metoclopramide Hydrochloride/Paracetamol                            |
| 12976        | Aspirin DL-Lysine/Metoclopramide hydrochloride                      |
| 13034        | Metoclopramide Hydrochloride                                        |
| 14844        | Metoclopramide hydrochloride                                        |
| 15601        | Metoclopramide hydrochloride                                        |
| 17180        | Metoclopramide Hydrochloride/Citric Acid/Sodium Bicarbonate/Aspirin |
| 17456        | Metoclopramide Hydrochloride/Aspirin Lysine                         |
| 17496        | Metoclopramide hydrochloride                                        |
| 17832        | Metoclopramide Hydrochloride                                        |
| 17946        | Metoclopramide Hydrochloride                                        |
| 21863        | Metoclopramide hydrochloride                                        |

|       |                              |
|-------|------------------------------|
| 23753 | Metoclopramide Hydrochloride |
| 25992 | Metoclopramide hydrochloride |
| 25994 | Metoclopramide hydrochloride |
| 26363 | Metoclopramide hydrochloride |
| 33229 | Metoclopramide hydrochloride |
| 34084 | Metoclopramide hydrochloride |
| 34325 | Metoclopramide hydrochloride |
| 34887 | Metoclopramide hydrochloride |
| 35046 | Metoclopramide hydrochloride |
| 39621 | Metoclopramide hydrochloride |
| 39653 | Metoclopramide hydrochloride |
| 39710 | Metoclopramide hydrochloride |
| 43448 | Metoclopramide hydrochloride |
| 47547 | Metoclopramide hydrochloride |
| 48445 | Metoclopramide hydrochloride |
| 52677 | Metoclopramide hydrochloride |
| 53162 | Metoclopramide hydrochloride |
| 60428 | Metoclopramide hydrochloride |
| 61961 | Metoclopramide hydrochloride |
| 63059 | Metoclopramide hydrochloride |
| 64838 | Metoclopramide hydrochloride |
| 65488 | Metoclopramide hydrochloride |
| 66770 | Metoclopramide hydrochloride |
| 68024 | Metoclopramide hydrochloride |

---

*Domperidone*

| Product Code | Substance Name                  |
|--------------|---------------------------------|
| 1020         | Domperidone maleate             |
| 1396         | Domperidone                     |
| 2254         | Domperidone maleate             |
| 4136         | Domperidone                     |
| 8066         | Domperidone                     |
| 9077         | Domperidone                     |
| 9476         | Paracetamol/Domperidone maleate |
| 9519         | Domperidone maleate             |
| 11614        | Paracetamol/Domperidone maleate |
| 14443        | Domperidone                     |
| 15092        | Domperidone maleate             |
| 26177        | Domperidone maleate             |
| 29216        | Domperidone maleate             |
| 30176        | Domperidone maleate             |
| 32971        | Domperidone maleate             |
| 43558        | Domperidone maleate             |
| 43710        | Domperidone                     |
| 44292        | Domperidone Maleate             |

|       |                     |
|-------|---------------------|
| 44603 | Domperidone Maleate |
| 45355 | Domperidone maleate |
| 45644 | Domperidone maleate |
| 49938 | Domperidone maleate |
| 52464 | Domperidone         |
| 54428 | Domperidone maleate |
| 56638 | Domperidone maleate |
| 62744 | Domperidone maleate |
| 63190 | Domperidone         |
| 64679 | Domperidone         |
| 66232 | Domperidone         |
| 68273 | Domperidone         |

---

*Erythromycin*

| Product Code | Substance Name                |
|--------------|-------------------------------|
| 63           | Erythromycin                  |
| 103          | Erythromycin                  |
| 104          | Benzoyl peroxide/Erythromycin |
| 105          | Erythromycin ethyl succinate  |
| 201          | Erythromycin lactobionate     |
| 318          | Erythromycin                  |
| 327          | Erythromycin ethyl succinate  |
| 397          | Erythromycin Ethyl Succinate  |
| 401          | Erythromycin                  |
| 438          | Erythromycin stearate         |
| 480          | Erythromycin stearate         |
| 532          | Erythromycin ethyl succinate  |
| 553          | Erythromycin Ethyl Succinate  |
| 733          | Erythromycin ethyl succinate  |
| 825          | Erythromycin ethyl succinate  |
| 993          | Erythromycin ethyl succinate  |
| 997          | Erythromycin ethyl succinate  |
| 1040         | Erythromycin                  |
| 1072         | Erythromycin stearate         |
| 2225         | Erythromycin ethyl succinate  |
| 2226         | Erythromycin ethyl succinate  |
| 2326         | Erythromycin Ethyl Succinate  |
| 2350         | Erythromycin stearate         |
| 2376         | Erythromycin ethyl succinate  |
| 2429         | Erythromycin ethyl succinate  |
| 2672         | Erythromycin/Zinc acetate     |
| 3042         | Erythromycin Ethyl Succinate  |
| 3209         | Erythromycin                  |
| 3572         | Erythromycin Ethyl Succinate  |
| 4153         | Erythromycin ethyl succinate  |

|       |                               |
|-------|-------------------------------|
| 4372  | Erythromycin Ethyl Succinate  |
| 4489  | Erythromycin                  |
| 4596  | Erythromycin Ethyl Succinate  |
| 4610  | Erythromycin ethyl succinate  |
| 4672  | Erythromycin ethyl succinate  |
| 4780  | Erythromycin/Zinc acetate     |
| 4891  | Erythromycin                  |
| 4895  | Benzoyl peroxide/Erythromycin |
| 5067  | Isotretinoin/Erythromycin     |
| 5397  | Erythromycin                  |
| 5716  | Erythromycin                  |
| 6426  | Erythromycin                  |
| 8211  | Benzoyl Peroxide/Erythromycin |
| 9148  | Erythromycin                  |
| 9434  | Erythromycin Ethyl Succinate  |
| 9656  | Erythromycin                  |
| 9760  | Erythromycin/Tretinoin        |
| 9903  | Erythromycin Lactobionate     |
| 9997  | Isotretinoin/Erythromycin     |
| 10190 | Erythromycin                  |
| 11611 | Erythromycin                  |
| 12330 | Erythromycin Ethyl Succinate  |
| 13120 | Erythromycin ethyl succinate  |
| 13167 | Erythromycin ethyl succinate  |
| 13635 | Erythromycin Ethyl Succinate  |
| 13881 | Erythromycin/Tretinoin        |
| 14171 | Erythromycin ethyl succinate  |
| 14429 | Erythromycin                  |
| 14511 | Erythromycin                  |
| 15713 | Erythromycin Ethyl Succinate  |
| 16747 | Erythromycin Ethyl Succinate  |
| 17207 | Erythromycin Lactobionate     |
| 18643 | Erythromycin                  |
| 18682 | Erythromycin Lactobionate     |
| 19330 | Erythromycin Lactobionate     |
| 21808 | Erythromycin ethyl succinate  |
| 23017 | Erythromycin                  |
| 23244 | Erythromycin                  |
| 23954 | Erythromycin stearate         |
| 24127 | Erythromycin                  |
| 24129 | Erythromycin                  |
| 24220 | Erythromycin ethyl succinate  |
| 25278 | Erythromycin                  |
| 25280 | Erythromycin                  |
| 25595 | Erythromycin ethyl succinate  |
| 25751 | Erythromycin Ethyl Succinate  |

|       |                              |
|-------|------------------------------|
| 26189 | Erythromycin lactobionate    |
| 26365 | Erythromycin                 |
| 27203 | Erythromycin ethyl succinate |
| 27495 | Erythromycin ethyl succinate |
| 27504 | Erythromycin ethyl succinate |
| 27768 | Erythromycin stearate        |
| 29154 | Erythromycin Lactobionate    |
| 29344 | Erythromycin                 |
| 30177 | Erythromycin ethyl succinate |
| 30234 | Erythromycin Ethyl Succinate |
| 30520 | Erythromycin ethyl succinate |
| 30980 | Erythromycin ethyl succinate |
| 31428 | Erythromycin                 |
| 31514 | Erythromycin ethyl succinate |
| 31530 | Erythromycin                 |
| 32898 | Erythromycin ethyl succinate |
| 32902 | Erythromycin ethyl succinate |
| 33248 | Erythromycin ethyl succinate |
| 33304 | Erythromycin                 |
| 33685 | Erythromycin                 |
| 33686 | Erythromycin                 |
| 33694 | Erythromycin ethyl succinate |
| 33695 | Erythromycin ethyl succinate |
| 33697 | Erythromycin ethyl succinate |
| 33703 | Erythromycin                 |
| 33705 | Erythromycin ethyl succinate |
| 34189 | Erythromycin                 |
| 34231 | Erythromycin ethyl succinate |
| 34334 | Erythromycin                 |
| 34479 | Erythromycin                 |
| 34512 | Erythromycin                 |
| 34779 | Erythromycin ethyl succinate |
| 34795 | Erythromycin ethyl succinate |
| 34837 | Erythromycin                 |
| 34853 | Erythromycin ethyl succinate |
| 34869 | Erythromycin                 |
| 34873 | Erythromycin                 |
| 36514 | Erythromycin ethyl succinate |
| 36544 | Erythromycin ethyl succinate |
| 37022 | Erythromycin ethyl succinate |
| 37681 | Erythromycin lactobionate    |
| 37694 | Erythromycin Lactobionate    |
| 37796 | Erythromycin Lactobionate    |
| 39118 | Erythromycin ethyl succinate |
| 39613 | Erythromycin stearate        |
| 39616 | Erythromycin stearate        |



|       |                              |
|-------|------------------------------|
| 39623 | Erythromycin ethyl succinate |
| 39632 | Erythromycin ethyl succinate |
| 39642 | Erythromycin ethyl succinate |
| 39669 | Erythromycin ethyl succinate |
| 40073 | Erythromycin Lactobionate    |
| 41389 | Erythromycin ethyl succinate |
| 41584 | Erythromycin ethyl succinate |
| 41604 | Erythromycin                 |
| 42296 | Erythromycin                 |
| 42659 | Erythromycin ethyl succinate |
| 42661 | Erythromycin                 |
| 45870 | Erythromycin ethyl succinate |
| 46154 | Erythromycin ethyl succinate |
| 46696 | Erythromycin ethyl succinate |
| 47126 | Erythromycin ethyl succinate |
| 47242 | Erythromycin ethyl succinate |
| 47676 | Erythromycin ethyl succinate |
| 48017 | Erythromycin ethyl succinate |
| 48101 | Erythromycin ethyl succinate |
| 49301 | Erythromycin stearate        |
| 49952 | Erythromycin                 |
| 49978 | Erythromycin ethyl succinate |
| 50205 | Erythromycin stearate        |
| 50223 | Erythromycin stearate        |
| 50580 | Erythromycin                 |
| 50693 | Erythromycin stearate        |
| 50694 | Erythromycin                 |
| 50948 | Erythromycin ethyl succinate |
| 51984 | Erythromycin stearate        |
| 52428 | Erythromycin                 |
| 52482 | Erythromycin/Zinc acetate    |
| 52860 | Erythromycin ethyl succinate |
| 52906 | Erythromycin                 |
| 52952 | Erythromycin                 |
| 53004 | Erythromycin stearate        |
| 53100 | Erythromycin/Zinc acetate    |
| 53449 | Erythromycin stearate        |
| 53986 | Erythromycin                 |
| 54098 | Erythromycin ethyl succinate |
| 55133 | Erythromycin                 |
| 55300 | Erythromycin                 |
| 55397 | Erythromycin                 |
| 55483 | Erythromycin                 |
| 55589 | Erythromycin ethyl succinate |
| 56203 | Erythromycin ethyl succinate |
| 57526 | Erythromycin/Zinc acetate    |

|       |                              |
|-------|------------------------------|
| 58756 | Erythromycin ethyl succinate |
| 58760 | Erythromycin ethyl succinate |
| 58824 | Erythromycin                 |
| 58841 | Erythromycin ethyl succinate |
| 58980 | Erythromycin/Zinc acetate    |
| 59036 | Erythromycin ethyl succinate |
| 59100 | Erythromycin                 |
| 59126 | Erythromycin ethyl succinate |
| 59441 | Erythromycin ethyl succinate |
| 60190 | Erythromycin                 |
| 60263 | Erythromycin ethyl succinate |
| 60308 | Erythromycin ethyl succinate |
| 60828 | Erythromycin                 |
| 61264 | Erythromycin                 |
| 61561 | Erythromycin ethyl succinate |
| 61612 | Erythromycin ethyl succinate |
| 62143 | Erythromycin ethyl succinate |
| 62466 | Erythromycin ethyl succinate |
| 62995 | Erythromycin ethyl succinate |
| 63032 | Erythromycin ethyl succinate |
| 63458 | Erythromycin ethyl succinate |
| 64312 | Erythromycin ethyl succinate |
| 64615 | Erythromycin ethyl succinate |
| 64732 | Erythromycin ethyl succinate |
| 65667 | Erythromycin ethyl succinate |
| 65956 | Erythromycin ethyl succinate |
| 66819 | Erythromycin stearate        |
| 68226 | Erythromycin ethyl succinate |
| 68367 | Erythromycin ethyl succinate |
| 69330 | Erythromycin ethyl succinate |
| 69403 | Erythromycin                 |
| 69480 | Erythromycin                 |
| 60828 | Erythromycin                 |
| 61264 | Erythromycin                 |
| 61561 | Erythromycin ethyl succinate |
| 61612 | Erythromycin ethyl succinate |
| 62143 | Erythromycin ethyl succinate |
| 62466 | Erythromycin ethyl succinate |
| 62995 | Erythromycin ethyl succinate |
| 63032 | Erythromycin ethyl succinate |
| 63458 | Erythromycin ethyl succinate |
| 64312 | Erythromycin ethyl succinate |
| 64615 | Erythromycin ethyl succinate |
| 64732 | Erythromycin ethyl succinate |
| 65667 | Erythromycin ethyl succinate |
| 65956 | Erythromycin ethyl succinate |

|       |                              |
|-------|------------------------------|
| 66819 | Erythromycin stearate        |
| 68226 | Erythromycin ethyl succinate |
| 68367 | Erythromycin ethyl succinate |
| 69330 | Erythromycin ethyl succinate |
| 69403 | Erythromycin                 |
| 69480 | Erythromycin                 |

---

*Cisapride*

| Product Code | Substance Name        |
|--------------|-----------------------|
| 1395         | Cisapride monohydrate |
| 1440         | Cisapride monohydrate |
| 1742         | Cisapride Monohydrate |
| 2765         | Cisapride monohydrate |
| 9011         | Cisapride monohydrate |
| 10420        | Cisapride monohydrate |
| 18425        | Cisapride Monohydrate |

---

*Prucalopride*

| Product Code | Substance Name         |
|--------------|------------------------|
| 43070        | Prucalopride succinate |
| 43213        | Prucalopride Succinate |
| 43214        | Prucalopride succinate |
| 44103        | Prucalopride Succinate |

---

*Omeprazole*

| Product Code | Substance Name       |
|--------------|----------------------|
| 18           | Omeprazole           |
| 89           | Omeprazole           |
| 276          | Omeprazole           |
| 1232         | Omeprazole           |
| 1451         | Omeprazole           |
| 4654         | Omeprazole           |
| 4921         | Omeprazole magnesium |
| 4955         | Omeprazole magnesium |
| 5232         | Omeprazole magnesium |
| 5236         | Omeprazole magnesium |
| 6114         | Omeprazole           |
| 7255         | Omeprazole           |
| 9825         | Omeprazole magnesium |
| 9851         | Omeprazole           |
| 9989         | Omeprazole           |
| 13015        | Omeprazole magnesium |

|       |                       |
|-------|-----------------------|
| 13282 | Omeprazole            |
| 15275 | Omeprazole            |
| 22709 | Omeprazole sodium     |
| 24360 | Omeprazole            |
| 25245 | Omeprazole sodium     |
| 26537 | Omeprazole            |
| 29422 | Omeprazole sodium     |
| 29457 | Omeprazole            |
| 29468 | Omeprazole            |
| 29835 | Omeprazole sodium     |
| 30926 | Omeprazole            |
| 31213 | Omeprazole            |
| 32914 | Omeprazole            |
| 32919 | Omeprazole            |
| 32924 | Omeprazole            |
| 33022 | Omeprazole            |
| 33326 | Omeprazole            |
| 33565 | Omeprazole            |
| 33873 | Omeprazole sodium     |
| 34302 | Omeprazole            |
| 34332 | Omeprazole            |
| 34411 | Omeprazole            |
| 34568 | Omeprazole            |
| 34571 | Omeprazole            |
| 34577 | Omeprazole            |
| 34791 | Omeprazole            |
| 34792 | Omeprazole            |
| 34812 | Omeprazole            |
| 34841 | Omeprazole            |
| 34843 | Omeprazole            |
| 34967 | Omeprazole            |
| 34984 | Omeprazole            |
| 35101 | Omeprazole            |
| 35257 | Omeprazole            |
| 35383 | Omeprazole            |
| 35698 | Omeprazole            |
| 35699 | Omeprazole            |
| 36046 | Omeprazole            |
| 36892 | Omeprazole            |
| 41364 | Ketoprofen/Omeprazole |
| 41365 | Omeprazole/Ketoprofen |
| 41366 | Ketoprofen/Omeprazole |
| 41367 | Omeprazole/Ketoprofen |
| 41992 | Omeprazole            |
| 42091 | Omeprazole            |
| 42114 | Omeprazole            |

|       |                      |
|-------|----------------------|
| 42533 | Omeprazole           |
| 42736 | Omeprazole           |
| 42898 | Omeprazole           |
| 42900 | Omeprazole           |
| 43957 | Omeprazole           |
| 44252 | Omeprazole           |
| 45173 | Omeprazole           |
| 47511 | Omeprazole           |
| 49163 | Omeprazole           |
| 49433 | Omeprazole           |
| 49584 | Omeprazole           |
| 50365 | Omeprazole           |
| 50372 | Omeprazole           |
| 51260 | Omeprazole           |
| 51357 | Omeprazole           |
| 52379 | Omeprazole           |
| 52612 | Omeprazole           |
| 52866 | Omeprazole           |
| 52971 | Omeprazole magnesium |
| 53337 | Omeprazole           |
| 53518 | Omeprazole           |
| 54683 | Omeprazole magnesium |
| 55168 | Omeprazole magnesium |
| 55468 | Omeprazole           |
| 55700 | Omeprazole           |
| 55744 | Omeprazole           |
| 55745 | Omeprazole           |
| 56235 | Omeprazole           |
| 56432 | Omeprazole           |
| 56433 | Omeprazole           |
| 56479 | Omeprazole           |
| 56895 | Omeprazole           |
| 57177 | Omeprazole           |
| 57528 | Omeprazole           |
| 57541 | Omeprazole           |
| 57566 | Omeprazole magnesium |
| 57648 | Omeprazole           |
| 57738 | Omeprazole           |
| 58066 | Omeprazole           |
| 58216 | Omeprazole           |
| 58236 | Omeprazole magnesium |
| 58332 | Omeprazole           |
| 58344 | Omeprazole           |
| 58946 | Omeprazole           |
| 59135 | Omeprazole           |
| 59547 | Omeprazole           |

|       |                      |
|-------|----------------------|
| 59725 | Omeprazole           |
| 60230 | Omeprazole           |
| 60403 | Omeprazole           |
| 60409 | Omeprazole magnesium |
| 61029 | Omeprazole           |
| 62166 | Omeprazole           |
| 63283 | Omeprazole           |
| 63324 | Omeprazole           |
| 63402 | Omeprazole           |
| 63608 | Omeprazole           |
| 63691 | Omeprazole           |
| 66552 | Omeprazole           |
| 66573 | Omeprazole           |
| 66643 | Omeprazole magnesium |
| 66903 | Omeprazole           |
| 68028 | Omeprazole           |
| 69899 | Omeprazole           |
| 70170 | Omeprazole           |
| 70797 | Omeprazole           |
| 70830 | Omeprazole           |
| 71065 | Omeprazole           |

---

*Lansoprazole*

| Product Code | Substance Name |
|--------------|----------------|
| 30           | Lansoprazole   |
| 39           | Lansoprazole   |
| 519          | Lansoprazole   |
| 1947         | Lansoprazole   |
| 5358         | Lansoprazole   |
| 6063         | Lansoprazole   |
| 6245         | Lansoprazole   |
| 6291         | Lansoprazole   |
| 6300         | Lansoprazole   |
| 10098        | Lansoprazole   |
| 37815        | Lansoprazole   |
| 39904        | Lansoprazole   |
| 40759        | Lansoprazole   |
| 40896        | Lansoprazole   |
| 42382        | Lansoprazole   |
| 42532        | Lansoprazole   |
| 42730        | Lansoprazole   |
| 43057        | Lansoprazole   |
| 44753        | Lansoprazole   |

---

|       |              |
|-------|--------------|
| 47909 | Lansoprazole |
| 48063 | Lansoprazole |
| 49209 | Lansoprazole |
| 50492 | Lansoprazole |
| 51290 | Lansoprazole |
| 53616 | Lansoprazole |
| 53871 | Lansoprazole |
| 54121 | Lansoprazole |
| 54188 | Lansoprazole |
| 54939 | Lansoprazole |
| 55439 | Lansoprazole |
| 57158 | Lansoprazole |
| 57504 | Lansoprazole |
| 57572 | Lansoprazole |
| 58679 | Lansoprazole |
| 59106 | Lansoprazole |
| 59404 | Lansoprazole |
| 59586 | Lansoprazole |
| 60537 | Lansoprazole |
| 60615 | Lansoprazole |
| 60900 | Lansoprazole |
| 62031 | Lansoprazole |
| 62549 | Lansoprazole |
| 63125 | Lansoprazole |
| 63831 | Lansoprazole |
| 64445 | Lansoprazole |
| 66348 | Lansoprazole |
| 67270 | Lansoprazole |
| 67385 | Lansoprazole |
| 67577 | Lansoprazole |
| 67811 | Lansoprazole |
| 68305 | Lansoprazole |
| 68873 | Lansoprazole |
| 69314 | Lansoprazole |
| 69769 | Lansoprazole |
| 70649 | Lansoprazole |
| 71087 | Lansoprazole |

---

*Rabeprazole*

| Product Code | Substance Name     |
|--------------|--------------------|
| 1977         | Rabeprazole sodium |
| 58475        | Rabeprazole sodium |
| 1941         | Rabeprazole sodium |
| 60590        | Rabeprazole sodium |
| 5834         | Rabeprazole sodium |

|       |                    |
|-------|--------------------|
| 59296 | Rabeprazole sodium |
| 2151  | Rabeprazole sodium |
| 58030 | Rabeprazole sodium |
| 60588 | Rabeprazole sodium |

---

*Pantoprazole*

| Product Code | Substance Name                    |
|--------------|-----------------------------------|
| 1986         | Pantoprazole sodium sesquihydrate |
| 5419         | Pantoprazole sodium sesquihydrate |
| 6165         | Pantoprazole sodium sesquihydrate |
| 6727         | Pantoprazole sodium sesquihydrate |
| 17111        | Pantoprazole sodium sesquihydrate |
| 44023        | Pantoprazole sodium sesquihydrate |
| 44700        | Pantoprazole sodium sesquihydrate |
| 49375        | Pantoprazole sodium sesquihydrate |
| 51804        | Pantoprazole sodium sesquihydrate |
| 54693        | Pantoprazole sodium sesquihydrate |
| 59390        | Pantoprazole sodium sesquihydrate |
| 59711        | Pantoprazole sodium sesquihydrate |
| 64750        | Pantoprazole sodium sesquihydrate |
| 65710        | Pantoprazole sodium sesquihydrate |
| 67327        | Pantoprazole sodium sesquihydrate |
| 68430        | Pantoprazole                      |
| 70804        | Pantoprazole sodium sesquihydrate |

---

*Esomeprazole*

| Product Code | Substance Name                             |
|--------------|--------------------------------------------|
| 5178         | Esomeprazole magnesium trihydrate          |
| 5269         | Esomeprazole magnesium trihydrate          |
| 5604         | Esomeprazole magnesium trihydrate          |
| 6490         | Esomeprazole magnesium trihydrate          |
| 18225        | Esomeprazole sodium                        |
| 25596        | Esomeprazole sodium                        |
| 41454        | Esomeprazole magnesium trihydrate          |
| 41501        | Esomeprazole magnesium trihydrate          |
| 43948        | Esomeprazole magnesium dihydrate           |
| 43995        | Esomeprazole magnesium dihydrate           |
| 44800        | Naproxen/Esomeprazole magnesium trihydrate |
| 44986        | Naproxen/Esomeprazole magnesium trihydrate |
| 46744        | Esomeprazole magnesium dihydrate           |
| 46745        | Esomeprazole magnesium dihydrate           |
| 51548        | Esomeprazole magnesium trihydrate          |
| 53843        | Esomeprazole magnesium trihydrate          |



|       |                                   |
|-------|-----------------------------------|
| 57311 | Esomeprazole magnesium dihydrate  |
| 61504 | Esomeprazole magnesium trihydrate |
| 61669 | Esomeprazole magnesium dihydrate  |
| 64332 | Esomeprazole magnesium trihydrate |
| 65142 | Esomeprazole magnesium dihydrate  |
| 65719 | Esomeprazole magnesium trihydrate |
| 69714 | Esomeprazole magnesium trihydrate |
| 69798 | Esomeprazole magnesium trihydrate |
| 70964 | Esomeprazole magnesium dihydrate  |

---

| Product Code | Substance Name                                   |
|--------------|--------------------------------------------------|
| 21251        | Paracetamol/Codeine phosphate/Caffeine           |
| 38301        | Dipipanone Hydrochloride/Cyclizine Hydrochloride |
| 25316        | Cyclizine Tartrate/Morphine Tartrate             |
| 17490        | Cyclizine Tartrate/Morphine Tartrate             |
| 55309        | Codeine phosphate                                |
| 47003        | Codeine phosphate                                |
| 50659        | Codeine phosphate                                |
| 71492        | Codeine phosphate                                |
| 539          | Codeine phosphate                                |
| 62228        | Codeine phosphate                                |
| 68538        | Codeine phosphate                                |
| 31452        | Codeine phosphate                                |
| 16096        | Codeine phosphate                                |
| 34552        | Codeine phosphate                                |
| 31700        | Codeine phosphate                                |
| 51644        | Codeine phosphate                                |
| 48004        | Codeine phosphate                                |
| 60958        | Codeine phosphate                                |
| 51327        | Codeine phosphate                                |
| 41599        | Codeine phosphate                                |
| 51937        | Codeine phosphate                                |
| 65118        | Codeine phosphate                                |
| 34383        | Codeine phosphate                                |
| 52888        | Codeine phosphate                                |
| 68861        | Codeine phosphate                                |
| 57381        | Codeine phosphate                                |
| 50468        | Codeine phosphate                                |
| 35792        | Codeine phosphate                                |
| 53600        | Codeine phosphate                                |
| 158          | Codeine phosphate                                |
| 382          | Codeine phosphate                                |
| 34789        | Codeine phosphate                                |

---

---

|       |                             |
|-------|-----------------------------|
| 31943 | Codeine phosphate           |
| 61091 | Codeine phosphate           |
| 56817 | Codeine phosphate           |
| 52889 | Codeine phosphate           |
| 48153 | Codeine phosphate           |
| 52929 | Codeine phosphate           |
| 34348 | Codeine phosphate           |
| 69066 | Codeine phosphate           |
| 66115 | Codeine phosphate           |
| 43550 | Codeine phosphate           |
| 34444 | Codeine phosphate           |
| 57487 | Codeine phosphate           |
| 41416 | Codeine phosphate           |
| 64108 | Codeine phosphate           |
| 64752 | Codeine phosphate           |
| 56559 | Codeine phosphate           |
| 60640 | Codeine phosphate           |
| 66893 | Codeine phosphate           |
| 65245 | Codeine phosphate           |
| 65269 | Codeine phosphate           |
| 72438 | Codeine phosphate           |
| 41535 | Codeine phosphate           |
| 69576 | Codeine phosphate           |
| 57752 | Codeine phosphate           |
| 67751 | Codeine phosphate           |
| 213   | Codeine phosphate           |
| 68509 | Codeine phosphate           |
| 43504 | Codeine phosphate           |
| 47919 | Codeine phosphate           |
| 53999 | Codeine phosphate           |
| 47952 | Codeine phosphate           |
| 50421 | Codeine phosphate           |
| 41214 | Codeine phosphate           |
| 4805  | Codeine Phosphate           |
| 34090 | Codeine phosphate           |
| 34172 | Codeine phosphate           |
| 34152 | Codeine phosphate           |
| 24125 | Codeine phosphate           |
| 34437 | Codeine phosphate           |
| 41523 | Codeine phosphate           |
| 34073 | Ethylmorphine hydrochloride |
| 42792 | Codeine phosphate           |
| 34176 | Codeine phosphate           |
| 4369  | Codeine phosphate           |
| 55425 | Dihydrocodeine Tartrate     |
| 34373 | Codeine phosphate           |

---

---

|       |                                              |
|-------|----------------------------------------------|
| 60944 | Methadone hydrochloride                      |
| 5322  | Methadone hydrochloride                      |
| 6441  | Methadone hydrochloride                      |
| 17917 | Dihydrocodeine Tartrate/Paracetamol          |
| 36608 | Codeine phosphate/Paracetamol                |
| 10176 | Codeine phosphate/Paracetamol                |
| 40663 | Codeine phosphate/Paracetamol                |
| 57353 | Codeine phosphate/Paracetamol                |
| 65904 | Codeine phosphate/Paracetamol                |
| 18261 | Aspirin/Papaveretum                          |
| 15779 | Codeine Phosphate/Aspirin                    |
| 7542  | Codeine Phosphate/Paracetamol                |
| 8246  | Codeine Phosphate/Paracetamol                |
| 33340 | Paracetamol/Dihydrocodeine tartrate          |
| 34667 | Codeine phosphate/Paracetamol                |
| 62635 | Paracetamol/Dihydrocodeine tartrate          |
| 66352 | Paracetamol/Codeine phosphate                |
| 45231 | Paracetamol/Dextropropoxyphene hydrochloride |
| 57865 | Codeine phosphate/Paracetamol                |
| 37904 | Codeine phosphate/Paracetamol                |
| 53702 | Codeine phosphate/Paracetamol                |
| 34865 | Paracetamol/Codeine phosphate                |
| 34815 | Paracetamol/Codeine phosphate                |
| 59442 | Codeine phosphate/Paracetamol                |
| 47081 | Codeine Phosphate/Caffeine/Paracetamol       |
| 38363 | Codeine Phosphate/Paracetamol                |
| 10023 | Dihydrocodeine Tartrate/Paracetamol          |
| 43414 | Codeine phosphate/Paracetamol                |
| 11807 | Codeine Phosphate/Paracetamol                |
| 3435  | Codeine phosphate/Paracetamol                |
| 56006 | Paracetamol/Codeine phosphate                |
| 10602 | Codeine phosphate/Paracetamol                |
| 65092 | Codeine phosphate/Paracetamol                |
| 46633 | Codeine phosphate/Paracetamol                |
| 36472 | Pentazocine Hydrochloride/Paracetamol        |
| 51381 | Paracetamol/Codeine phosphate/Caffeine       |
| 47071 | Dihydrocodeine Tartrate/Paracetamol          |
| 14912 | Codeine Phosphate/Paracetamol                |
| 27785 | Codeine phosphate/Paracetamol                |
| 16039 | Codeine Phosphate/Caffeine/Paracetamol       |
| 9562  | Dihydrocodeine Tartrate/Paracetamol          |
| 19    | Paracetamol/Codeine phosphate                |
| 71227 | Paracetamol/Codeine phosphate/Caffeine       |
| 10509 | Pentazocine Hydrochloride/Paracetamol        |
| 38088 | Codeine Phosphate/Paracetamol                |
| 71614 | Codeine phosphate/Paracetamol                |

---

---

|       |                                              |
|-------|----------------------------------------------|
| 43244 | Codeine phosphate/Paracetamol                |
| 51819 | Codeine phosphate/Paracetamol                |
| 2794  | Codeine phosphate/Paracetamol                |
| 41276 | Paracetamol/Codeine phosphate                |
| 34554 | Paracetamol/Dextropropoxyphene hydrochloride |
| 306   | Codeine Phosphate/Caffeine/Aspirin           |
| 14785 | Codeine Phosphate/Paracetamol                |
| 71566 | Dihydrocodeine tartrate/Paracetamol          |
| 46729 | Paracetamol/Codeine phosphate                |
| 7063  | Paracetamol/Dihydrocodeine tartrate          |
| 2040  | Paracetamol/Dihydrocodeine tartrate          |
| 28780 | Paracetamol/Dihydrocodeine tartrate          |
| 66602 | Caffeine/Codeine phosphate/Paracetamol       |
| 18221 | Codeine Phosphate/Paracetamol                |
| 1762  | Dextropropoxyphene Hydrochloride/Paracetamol |
| 33995 | Paracetamol/Dextropropoxyphene hydrochloride |
| 3156  | Codeine phosphate/Paracetamol                |
| 483   | Dextropropoxyphene Hydrochloride/Paracetamol |
| 23420 | Codeine Phosphate/Paracetamol                |
| 58855 | Codeine phosphate/Paracetamol                |
| 7450  | Pentazocine Hydrochloride/Paracetamol        |
| 29488 | Codeine phosphate/Paracetamol                |
| 9516  | Codeine phosphate/Paracetamol                |
| 28598 | Dihydrocodeine Tartrate/Paracetamol          |
| 625   | Codeine phosphate/Paracetamol                |
| 16592 | Codeine Phosphate/Caffeine/Paracetamol       |
| 9462  | Codeine Phosphate/Paracetamol                |
| 29342 | Paracetamol/Codeine phosphate                |
| 33743 | Dihydrocodeine Tartrate/Paracetamol          |
| 47847 | Codeine phosphate/Paracetamol                |
| 52966 | Paracetamol/Codeine phosphate/Caffeine       |
| 57900 | Codeine phosphate/Paracetamol                |
| 18482 | Dextropropoxyphene Hydrochloride/Paracetamol |
| 5955  | Dihydrocodeine tartrate/Paracetamol          |
| 52085 | Codeine phosphate/Paracetamol                |
| 34840 | Codeine phosphate/Paracetamol                |
| 4950  | Dihydrocodeine Tartrate/Paracetamol          |
| 17563 | Codeine phosphate/Paracetamol                |
| 17158 | Codeine phosphate/Paracetamol                |
| 4556  | Paracetamol/Dihydrocodeine tartrate          |
| 66538 | Codeine phosphate/Paracetamol                |
| 67779 | Paracetamol/Dihydrocodeine tartrate          |
| 33643 | Paracetamol/Codeine phosphate                |
| 38950 | Dihydrocodeine tartrate/Paracetamol          |
| 61372 | Paracetamol/Dihydrocodeine tartrate          |
| 59479 | Codeine phosphate/Paracetamol                |

---

---

|       |                                              |
|-------|----------------------------------------------|
| 72389 | Paracetamol/Codeine phosphate                |
| 16076 | Tramadol Hydrochloride/Paracetamol           |
| 56266 | Codeine phosphate/Paracetamol                |
| 70518 | Paracetamol/Codeine phosphate                |
| 57197 | Paracetamol/Dihydrocodeine tartrate          |
| 30295 | Dihydrocodeine Tartrate/Paracetamol          |
| 11325 | Codeine Phosphate/Paracetamol                |
| 47508 | Codeine phosphate/Paracetamol                |
| 36019 | Paracetamol/Dihydrocodeine tartrate          |
| 46906 | Codeine phosphate/Paracetamol                |
| 32926 | Paracetamol/Dihydrocodeine tartrate          |
| 2555  | Dihydrocodeine Tartrate/Paracetamol          |
| 67106 | Codeine phosphate/Paracetamol                |
| 38085 | Codeine Phosphate/Paracetamol                |
| 60517 | Codeine phosphate/Paracetamol                |
| 56565 | Codeine phosphate/Paracetamol                |
| 44210 | Codeine phosphate/Paracetamol                |
| 59986 | Codeine phosphate/Paracetamol                |
| 2917  | Codeine Phosphate/Paracetamol                |
| 34546 | Paracetamol/Dextropropoxyphene hydrochloride |
| 96    | Codeine phosphate/Paracetamol                |
| 20565 | Codeine Phosphate/Caffeine/Paracetamol       |
| 10582 | Codeine Phosphate/Paracetamol                |
| 17926 | Codeine Phosphate/Aspirin                    |
| 15831 | Codeine Phosphate/Paracetamol                |
| 3724  | Paracetamol/Codeine phosphate                |
| 10122 | Dihydrocodeine Tartrate/Paracetamol          |
| 48775 | Codeine phosphate/Paracetamol                |
| 1640  | Codeine phosphate/Paracetamol                |
| 9163  | Dihydrocodeine Tartrate/Paracetamol          |
| 9457  | Codeine Phosphate/Paracetamol                |
| 20127 | Codeine Phosphate/Aspirin                    |
| 25109 | Paracetamol/Codeine phosphate/Caffeine       |
| 41682 | Codeine phosphate/Paracetamol                |
| 43536 | Paracetamol/Dextropropoxyphene hydrochloride |
| 56205 | Paracetamol/Codeine phosphate/Caffeine       |
| 28253 | Dextropropoxyphene Hydrochloride/Paracetamol |
| 11    | Paracetamol/Dihydrocodeine tartrate          |
| 46987 | Codeine phosphate/Paracetamol                |
| 7072  | Codeine phosphate/Paracetamol                |
| 30165 | Dihydrocodeine Tartrate/Paracetamol          |
| 9432  | Codeine Phosphate/Aspirin                    |
| 64368 | Dihydrocodeine tartrate/Paracetamol          |
| 810   | Codeine phosphate/Paracetamol                |
| 34968 | Paracetamol/Codeine phosphate                |
| 66904 | Paracetamol/Codeine phosphate                |

---

---

|       |                                              |
|-------|----------------------------------------------|
| 11009 | Codeine Phosphate/Caffeine/Paracetamol       |
| 61698 | Paracetamol/Dihydrocodeine tartrate          |
| 53079 | Paracetamol/Dihydrocodeine tartrate          |
| 9785  | Dihydrocodeine tartrate/Paracetamol          |
| 14964 | Codeine phosphate/Paracetamol/Caffeine       |
| 34920 | Paracetamol/Dihydrocodeine tartrate          |
| 36993 | Codeine phosphate/Paracetamol                |
| 56340 | Codeine phosphate/Paracetamol                |
| 2846  | Codeine Phosphate/Paracetamol                |
| 3185  | Codeine Phosphate/Paracetamol                |
| 71006 | Paracetamol/Dihydrocodeine tartrate          |
| 30966 | Paracetamol/Dextropropoxyphene hydrochloride |
| 57839 | Codeine phosphate/Paracetamol                |
| 7499  | Codeine Phosphate/Caffeine/Paracetamol       |
| 58501 | Codeine phosphate/Paracetamol                |
| 34939 | Paracetamol/Dihydrocodeine tartrate          |
| 34518 | Paracetamol/Codeine phosphate                |
| 767   | Codeine phosphate/Paracetamol                |
| 58636 | Codeine phosphate/Paracetamol                |
| 9855  | Paracetamol/Dihydrocodeine tartrate          |
| 57    | Codeine phosphate/Paracetamol                |
| 14676 | Codeine Phosphate/Caffeine/Paracetamol       |
| 10178 | Paracetamol/Codeine phosphate/Caffeine       |
| 8335  | Codeine phosphate/Paracetamol                |
| 3713  | Paracetamol/Codeine phosphate                |
| 64387 | Codeine phosphate/Paracetamol                |
| 65035 | Paracetamol/Dihydrocodeine tartrate          |
| 45276 | Paracetamol/Dextropropoxyphene hydrochloride |
| 14688 | Dihydrocodeine Tartrate/Paracetamol          |
| 57097 | Codeine phosphate/Paracetamol                |
| 39340 | Paracetamol/Codeine phosphate                |
| 58288 | Codeine phosphate/Paracetamol                |
| 16818 | Codeine Phosphate/Paracetamol                |
| 6886  | Codeine Phosphate/Paracetamol                |
| 23952 | Codeine phosphate/Paracetamol                |
| 25529 | Codeine Phosphate/Caffeine/Paracetamol       |
| 27784 | Paracetamol/Codeine phosphate                |
| 63683 | Codeine phosphate/Aspirin                    |
| 59705 | Codeine phosphate/Paracetamol                |
| 800   | Codeine phosphate/Paracetamol                |
| 32692 | Codeine phosphate/Paracetamol                |
| 48311 | Codeine phosphate/Paracetamol                |
| 25514 | Codeine Phosphate/Paracetamol                |
| 71523 | Paracetamol/Dihydrocodeine tartrate          |
| 34845 | Codeine phosphate/Paracetamol                |
| 66553 | Codeine phosphate/Paracetamol                |

---

---

|       |                                                        |
|-------|--------------------------------------------------------|
| 21703 | Codeine Phosphate/Paracetamol                          |
| 16467 | Codeine Phosphate/Paracetamol                          |
| 46898 | Paracetamol/Codeine phosphate                          |
| 63658 | Codeine Phosphate/Aspirin                              |
| 63900 | Paracetamol/Codeine phosphate                          |
| 72282 | Paracetamol/Dihydrocodeine tartrate                    |
| 57929 | Codeine phosphate/Paracetamol                          |
| 53679 | Codeine phosphate/Paracetamol                          |
| 34229 | Codeine phosphate/Paracetamol                          |
|       | Codeine Phosphate/Caffeine Citrate/Citric Acid/Calcium |
| 24828 | Carbonate/Aspirin                                      |
| 15198 | Paracetamol/Dihydrocodeine tartrate                    |
| 2047  | Codeine Phosphate/Aspirin                              |
| 64545 | Paracetamol/Codeine phosphate                          |
| 40662 | Codeine phosphate/Paracetamol                          |
| 51084 | Codeine phosphate/Paracetamol                          |
| 41259 | Codeine phosphate/Paracetamol                          |
| 64726 | Codeine phosphate/Paracetamol                          |
| 31155 | Paracetamol/Codeine phosphate                          |
| 69304 | Codeine phosphate/Paracetamol                          |
| 7518  | Codeine Phosphate/Aspirin                              |
| 28784 | Codeine Phosphate/Aspirin                              |
| 61647 | Codeine phosphate/Paracetamol                          |
| 40385 | Codeine phosphate/Paracetamol                          |
| 68252 | Codeine phosphate/Paracetamol                          |
| 41275 | Paracetamol/Codeine phosphate                          |
| 67753 | Paracetamol/Codeine phosphate                          |
| 55530 | Paracetamol/Dihydrocodeine tartrate                    |
| 29373 | Codeine Phosphate/Caffeine/Paracetamol                 |
| 2462  | Paracetamol/Dextropropoxyphene hydrochloride           |
| 9742  | Codeine Phosphate/Caffeine/Paracetamol                 |
| 65806 | Paracetamol/Codeine phosphate                          |
| 21673 | Codeine Phosphate/Caffeine/Paracetamol                 |
| 8329  | Codeine Phosphate/Caffeine/Paracetamol                 |
| 31871 | Codeine Phosphate/Paracetamol                          |
| 66807 | Codeine Phosphate/Paracetamol                          |
| 34497 | Paracetamol/Codeine phosphate                          |
| 72258 | Dihydrocodeine tartrate/Paracetamol                    |
| 58848 | Dihydrocodeine tartrate/Paracetamol                    |
| 53287 | Codeine phosphate/Paracetamol                          |
| 57465 | Paracetamol/Codeine phosphate                          |
| 72111 | Paracetamol/Dihydrocodeine tartrate                    |
| 2211  | Codeine phosphate/Paracetamol                          |
| 59131 | Codeine phosphate/Paracetamol                          |
| 44159 | Caffeine/Codeine phosphate/Paracetamol                 |
| 31577 | Codeine phosphate/Paracetamol                          |

---

---

|       |                                              |
|-------|----------------------------------------------|
| 44924 | Codeine phosphate/Paracetamol                |
| 72110 | Dihydrocodeine tartrate/Paracetamol          |
| 63551 | Codeine phosphate/Paracetamol                |
| 21880 | Codeine phosphate/Paracetamol                |
| 30123 | Codeine phosphate/Paracetamol                |
| 11250 | Paracetamol/Codeine phosphate                |
| 70497 | Paracetamol/Codeine phosphate                |
| 54713 | Paracetamol/Dihydrocodeine tartrate          |
| 46511 | Codeine phosphate/Paracetamol                |
| 11665 | Codeine phosphate/Paracetamol                |
| 40422 | Paracetamol/Dihydrocodeine tartrate          |
| 19206 | Paracetamol/Dihydrocodeine tartrate          |
| 64074 | Paracetamol/Dihydrocodeine tartrate          |
| 55465 | Codeine phosphate/Paracetamol                |
| 56549 | Codeine phosphate/Paracetamol                |
| 38430 | Paracetamol/Dihydrocodeine tartrate          |
| 22764 | Paracetamol/Codeine phosphate                |
| 43441 | Paracetamol/Dihydrocodeine tartrate          |
| 9460  | Codeine Phosphate/Paracetamol                |
| 65314 | Paracetamol/Codeine phosphate                |
| 656   | Codeine phosphate/Paracetamol                |
| 10226 | Paracetamol/Codeine phosphate/Caffeine       |
| 34737 | Paracetamol/Dihydrocodeine tartrate          |
| 21113 | Dihydrocodeine Tartrate/Paracetamol          |
| 4671  | Codeine Phosphate/Paracetamol                |
| 33679 | Paracetamol/Codeine phosphate                |
| 56461 | Codeine phosphate/Paracetamol                |
| 56171 | Codeine phosphate/Paracetamol                |
| 55044 | Codeine phosphate/Paracetamol                |
| 34397 | Paracetamol/Dextropropoxyphene hydrochloride |
| 4607  | Paracetamol/Dextropropoxyphene hydrochloride |
| 39756 | Fentanyl citrate                             |
| 44837 | Fentanyl                                     |
| 31584 | Pentazocine lactate                          |
| 31053 | Fentanyl                                     |
| 37954 | Fentanyl                                     |
| 3919  | Morphine sulfate                             |
| 47753 | Morphine sulfate                             |
| 14050 | Morphine Sulphate                            |
| 34008 | Dihydrocodeine tartrate                      |
| 48912 | Diamorphine hydrochloride                    |
| 58129 | Tramadol hydrochloride                       |
| 5697  | Fentanyl citrate                             |
| 36211 | Fentanyl                                     |
| 40159 | Dihydrocodeine tartrate                      |
| 61935 | Oxycodone hydrochloride                      |

---



---

|       |                                                |
|-------|------------------------------------------------|
| 6790  | Oxycodone hydrochloride                        |
| 57052 | Oxycodone hydrochloride                        |
| 53062 | Hydromorphone hydrochloride                    |
| 40563 | Morphine sulfate                               |
| 58316 | Tramadol hydrochloride                         |
| 56665 | Oxycodone hydrochloride                        |
| 18734 | Morphine sulfate                               |
| 328   | Pentazocine hydrochloride                      |
| 4115  | Tramadol hydrochloride                         |
| 70988 | Fentanyl                                       |
| 64164 | Oxycodone hydrochloride                        |
| 12602 | Morphine sulfate                               |
| 56670 | Fentanyl                                       |
| 36035 | Tramadol hydrochloride                         |
| 54694 | Oxycodone hydrochloride                        |
| 45929 | Oxycodone hydrochloride                        |
| 43198 | Tramadol hydrochloride                         |
| 39558 | Dihydrocodeine tartrate                        |
| 53929 | Pethidine hydrochloride                        |
| 53273 | Morphine hydrochloride                         |
| 45439 | Fentanyl citrate                               |
| 29500 | Diamorphine hydrochloride                      |
| 13711 | Morphine Sulphate                              |
| 37968 | Fentanyl                                       |
| 63423 | Morphine sulfate                               |
| 45736 | Morphine sulfate                               |
| 37867 | Tramadol Hydrochloride                         |
| 38528 | Tramadol hydrochloride                         |
| 4691  | Fentanyl                                       |
| 57027 | Pethidine hydrochloride                        |
| 17734 | Dextromoramide Tartrate                        |
| 45982 | Tapentadol hydrochloride                       |
| 17167 | Phenazocine Hydrobromide                       |
| 22024 | Morphine sulfate                               |
| 47671 | Diamorphine Hydrochloride                      |
| 71711 | Buprenorphine                                  |
| 15950 | Morphine sulfate                               |
| 67474 | Fentanyl                                       |
| 6459  | Diamorphine Hydrochloride                      |
| 40061 | Tramadol hydrochloride                         |
| 31650 | Morphine sulfate                               |
| 41974 | Morphine sulfate                               |
| 42708 | Pethidine Hydrochloride                        |
| 11748 | Tramadol hydrochloride                         |
| 40645 | Oxycodone hydrochloride/Naloxone hydrochloride |
| 65932 | Oxycodone hydrochloride                        |

---

---

|       |                                                  |
|-------|--------------------------------------------------|
| 12020 | Cyclizine hydrochloride/Dipipanone hydrochloride |
| 6153  | Tramadol hydrochloride                           |
| 8876  | Morphine sulfate                                 |
| 35038 | Oxycodone hydrochloride                          |
| 60759 | Tapentadol hydrochloride                         |
| 70801 | Hydromorphone hydrochloride                      |
| 15781 | Morphine Sulphate                                |
| 18656 | Morphine sulfate                                 |
| 72210 | Dihydrocodeine tartrate                          |
| 65372 | Diamorphine hydrochloride                        |
| 55852 | Pethidine Hydrochloride                          |
| 34260 | Tramadol hydrochloride                           |
| 59490 | Fentanyl                                         |
| 40434 | Fentanyl citrate                                 |
| 45460 | Fentanyl                                         |
| 49976 | Morphine sulfate                                 |
| 22026 | Morphine sulfate                                 |
| 54406 | Morphine sulfate                                 |
| 45598 | Fentanyl citrate                                 |
| 16271 | Tramadol hydrochloride                           |
| 37779 | Fentanyl                                         |
| 9381  | Morphine sulfate                                 |
| 40249 | Tramadol hydrochloride                           |
| 36040 | Fentanyl                                         |
| 42399 | Fentanyl citrate                                 |
| 7555  | Buprenorphine                                    |
| 28805 | Dextromoramide Tartrate                          |
| 12900 | Morphine sulfate                                 |
| 687   | Paracetamol/Tramadol hydrochloride               |
| 40957 | Fentanyl citrate                                 |
| 70460 | Buprenorphine                                    |
| 24453 | Morphine Sulphate                                |
| 59865 | Oxycodone hydrochloride                          |
| 18792 | Diamorphine hydrochloride                        |
| 11405 | Oxycodone hydrochloride                          |
| 61744 | Morphine sulfate                                 |
| 34489 | Diamorphine Hydrochloride                        |
| 30633 | Levorphanol Tartrate                             |
| 54017 | Morphine Sulphate                                |
| 48483 | Diamorphine hydrochloride                        |
| 72098 | Buprenorphine                                    |
| 40058 | Tramadol hydrochloride                           |
| 39180 | Fentanyl                                         |
| 458   | Morphine Sulphate                                |
| 28728 | Tramadol hydrochloride                           |
| 31734 | Tramadol hydrochloride                           |

---

---

|       |                                                    |
|-------|----------------------------------------------------|
| 26283 | Morphine sulfate                                   |
| 40254 | Tramadol hydrochloride                             |
| 10205 | Buprenorphine                                      |
| 58499 | Diamorphine hydrochloride                          |
| 9332  | Hydromorphone hydrochloride                        |
| 43652 | Morphine sulfate                                   |
| 48413 | Diamorphine hydrochloride                          |
| 19993 | Tramadol hydrochloride                             |
| 22690 | Morphine Sulphate                                  |
| 31960 | Diamorphine hydrochloride                          |
| 28189 | Fentanyl                                           |
| 70800 | Hydromorphone hydrochloride                        |
| 14900 | Fentanyl                                           |
| 10730 | Morphine sulfate                                   |
| 47949 | Morphine sulfate                                   |
| 54085 | Pethidine Hydrochloride                            |
| 7849  | Diamorphine Hydrochloride                          |
| 47399 | Tapentadol hydrochloride                           |
| 28421 | Morphine Sulphate                                  |
| 34422 | Tramadol hydrochloride                             |
| 19119 | Nalbuphine Hydrochloride                           |
| 19116 | Pethidine hydrochloride/Promethazine hydrochloride |
| 35651 | Tramadol hydrochloride                             |
| 7517  | Morphine sulfate                                   |
| 46643 | Tramadol hydrochloride                             |
| 40785 | Naloxone hydrochloride/Oxycodone hydrochloride     |
| 67323 | Tramadol hydrochloride                             |
| 65392 | Oxycodone hydrochloride                            |
| 48133 | Dihydrocodeine tartrate                            |
| 10922 | Fentanyl                                           |
| 16335 | Cyclizine tartrate/Morphine tartrate               |
| 35438 | Tramadol hydrochloride                             |
| 10769 | Pentazocine hydrochloride                          |
| 234   | Pethidine Hydrochloride                            |
| 69243 | Buprenorphine                                      |
| 34662 | Dihydrocodeine tartrate                            |
| 9389  | Tramadol hydrochloride                             |
| 9183  | Morphine sulfate                                   |
| 43657 | Morphine sulfate                                   |
| 3653  | Dihydrocodeine tartrate                            |
| 16964 | Nalbuphine Hydrochloride                           |
| 5079  | Diamorphine Hydrochloride                          |
| 8822  | Morphine sulfate                                   |
| 40688 | Oxycodone hydrochloride                            |
| 55839 | Pethidine Hydrochloride                            |
| 64496 | Tramadol hydrochloride                             |

---

---

|       |                           |
|-------|---------------------------|
| 53    | Dihydrocodeine tartrate   |
| 58279 | Diamorphine hydrochloride |
| 63547 | Codeine phosphate         |
| 7372  | Oxycodone hydrochloride   |
| 38031 | Fentanyl                  |
| 44867 | Pentazocine lactate       |
| 65266 | Tramadol hydrochloride    |
| 39750 | Tramadol hydrochloride    |
| 13997 | Morphine Sulphate         |
| 55724 | Diamorphine hydrochloride |
| 3239  | Meptazinol hydrochloride  |
| 4266  | Morphine sulfate          |
| 3698  | Dihydrocodeine tartrate   |
| 68559 | Buprenorphine             |
| 66336 | Morphine Sulphate         |
| 11471 | Tramadol hydrochloride    |
| 27591 | Tramadol hydrochloride    |
| 24108 | Diamorphine Hydrochloride |
| 5563  | Morphine Sulphate         |
| 38013 | Pethidine hydrochloride   |
| 68210 | Tramadol hydrochloride    |
| 45800 | Tapentadol hydrochloride  |
| 56202 | Morphine Sulphate         |
| 59989 | Dihydrocodeine tartrate   |
| 495   | Morphine sulfate          |
| 5169  | Tramadol hydrochloride    |
| 13076 | Fentanyl citrate          |
| 40128 | Fentanyl citrate          |
| 13995 | Morphine Sulphate         |
| 8075  | Morphine Sulphate         |
| 70552 | Codeine phosphate         |
| 6269  | Morphine sulfate          |
| 51235 | Fentanyl                  |
| 26284 | Morphine sulfate          |
| 12604 | Morphine sulfate          |
| 68890 | Buprenorphine             |
| 13114 | Morphine sulfate          |
| 11549 | Tramadol hydrochloride    |
| 55752 | Fentanyl                  |
| 70376 | Fentanyl                  |
| 5714  | Morphine sulfate          |
| 46019 | Tapentadol hydrochloride  |
| 46587 | Tramadol hydrochloride    |
| 47072 | Papaveretum               |
| 16273 | Morphine sulfate          |
| 39746 | Fentanyl citrate          |

---

---

|       |                                                                                  |
|-------|----------------------------------------------------------------------------------|
| 24867 | Pethidine Hydrochloride/levallorphan                                             |
| 69894 | Tramadol hydrochloride                                                           |
| 18881 | Morphine sulfate                                                                 |
| 56329 | Morphine sulfate                                                                 |
| 67310 | Tramadol hydrochloride                                                           |
| 7397  | Fentanyl                                                                         |
| 19471 | Morphine sulfate                                                                 |
| 25481 | Morphine Anhydrous                                                               |
| 31105 | Tramadol hydrochloride                                                           |
| 12591 | Morphine sulfate                                                                 |
| 65646 | Fentanyl citrate                                                                 |
| 12076 | Dextropropoxyphene Napsylate                                                     |
| 58290 | Morphine sulfate                                                                 |
| 50532 | Dihydrocodeine tartrate                                                          |
| 41161 | Fentanyl                                                                         |
| 67796 | Diamorphine hydrochloride<br>Codeine Phosphate/Papaverine Hydrochloride/Morphine |
| 19317 | Hydrochloride                                                                    |
| 61305 | Fentanyl                                                                         |
| 47672 | Diamorphine Hydrochloride                                                        |
| 32897 | Diamorphine hydrochloride                                                        |
| 31885 | Pethidine hydrochloride                                                          |
| 39590 | Fentanyl citrate                                                                 |
| 26336 | Tramadol hydrochloride                                                           |
| 3990  | Dextromoramide tartrate                                                          |
| 9927  | Oxycodone hydrochloride                                                          |
| 9275  | Dihydrocodeine tartrate                                                          |
| 72225 | Morphine sulfate                                                                 |
| 70274 | Morphine sulfate                                                                 |
| 70461 | Buprenorphine                                                                    |
| 25979 | Dextropropoxyphene napsylate                                                     |
| 5840  | Morphine sulfate                                                                 |
| 38365 | Fentanyl                                                                         |
| 46657 | Fentanyl                                                                         |
| 68712 | Morphine hydrochloride                                                           |
| 24986 | Fentanyl citrate                                                                 |
| 6366  | Morphine sulfate                                                                 |
| 18174 | Fentanyl citrate                                                                 |
| 10631 | Morphine Anhydrous                                                               |
| 5668  | Diamorphine Hydrochloride                                                        |
| 35341 | Oxycodone hydrochloride                                                          |
| 4823  | Dihydrocodeine tartrate                                                          |
| 23442 | Pethidine hydrochloride                                                          |
| 5048  | Fentanyl                                                                         |
| 34579 | Dihydrocodeine tartrate                                                          |
| 43089 | Fentanyl citrate                                                                 |

---

---

|       |                                      |
|-------|--------------------------------------|
| 19954 | Hydromorphone hydrochloride          |
| 49742 | Oxycodone hydrochloride              |
| 61775 | Tramadol hydrochloride               |
| 61610 | Tramadol hydrochloride               |
| 61708 | Fentanyl citrate                     |
| 55832 | Morphine sulfate                     |
| 5833  | Cyclizine tartrate/Morphine tartrate |
| 45325 | Pethidine Hydrochloride              |
| 6002  | Morphine sulfate                     |
| 7236  | Buprenorphine                        |
| 50947 | Tramadol hydrochloride               |
| 70117 | Buprenorphine                        |
| 66695 | Buprenorphine                        |
| 47413 | Fentanyl                             |
| 42590 | Fentanyl                             |
| 423   | Pethidine Hydrochloride              |
| 9557  | Morphine sulfate                     |
| 67018 | Buprenorphine                        |
| 48148 | Pethidine hydrochloride              |
| 5651  | Fentanyl citrate                     |
| 23060 | Morphine sulfate                     |
| 12219 | Morphine sulfate                     |
| 63047 | Tramadol hydrochloride               |
| 7167  | Oxycodone hydrochloride              |
| 4477  | Morphine sulfate                     |
| 5257  | Tramadol Hydrochloride               |
| 39929 | Fentanyl citrate                     |
| 42332 | Paracetamol/Tramadol hydrochloride   |
| 5555  | Morphine sulfate                     |
| 66299 | Tramadol hydrochloride               |
| 56178 | Codeine phosphate                    |
| 6232  | Morphine sulfate                     |
| 42094 | Pentazocine lactate                  |
| 9960  | Morphine Sulphate                    |
| 48090 | Tramadol hydrochloride               |
| 45827 | Oxycodone hydrochloride              |
| 37719 | Fentanyl                             |
| 66815 | Morphine sulfate                     |
| 8735  | Diamorphine hydrochloride            |
| 37251 | Alfentanil hydrochloride             |
| 11982 | Fentanyl                             |
| 29860 | Tramadol hydrochloride               |
| 47867 | Morphine sulfate                     |
| 38874 | Tramadol hydrochloride               |
| 51789 | Oxycodone hydrochloride              |
| 40239 | Pethidine hydrochloride              |

---

---

|       |                                                  |
|-------|--------------------------------------------------|
| 64459 | Paracetamol/Tramadol hydrochloride               |
| 191   | Dihydrocodeine tartrate                          |
| 39084 | Fentanyl                                         |
| 66463 | Buprenorphine                                    |
| 43617 | Fentanyl citrate                                 |
| 54806 | Buprenorphine                                    |
| 70631 | Buprenorphine                                    |
| 68196 | Buprenorphine                                    |
| 11698 | Morphine Sulphate                                |
| 35806 | Tramadol hydrochloride                           |
| 41135 | Fentanyl citrate                                 |
| 15798 | Hydromorphone hydrochloride                      |
| 66616 | Oxycodone hydrochloride                          |
| 71335 | Oxycodone hydrochloride                          |
| 7469  | Dihydrocodeine tartrate                          |
| 5599  | Oxycodone hydrochloride                          |
| 4834  | Tramadol hydrochloride                           |
| 33654 | Dihydrocodeine tartrate                          |
| 59482 | Fentanyl                                         |
| 61918 | Morphine sulfate                                 |
| 37928 | Fentanyl                                         |
| 48259 | Diamorphine hydrochloride                        |
| 25611 | Dextromoramide Tartrate                          |
| 9001  | Cyclizine hydrochloride/Dipipanone hydrochloride |
| 9973  | Oxycodone hydrochloride                          |
| 20039 | Levorphanol Tartrate                             |
| 50513 | Morphine sulfate                                 |
| 46658 | Fentanyl                                         |
| 68797 | Oxycodone hydrochloride                          |
| 47154 | Morphine sulfate                                 |
| 46020 | Tapentadol hydrochloride                         |
| 29020 | Morphine sulfate                                 |
| 54979 | Fentanyl                                         |
| 46354 | Fentanyl citrate                                 |
| 4693  | Morphine sulfate                                 |
| 13813 | Tramadol hydrochloride                           |
| 54023 | Tramadol hydrochloride                           |
| 52400 | Pethidine hydrochloride                          |
| 30252 | Morphine Anhydrous                               |
| 21275 | Hydromorphone hydrochloride                      |
| 9945  | Diamorphine hydrochloride                        |
| 6414  | Oxycodone Hydrochloride                          |
| 34440 | Dihydrocodeine tartrate                          |
| 71358 | Tramadol hydrochloride                           |
| 40576 | Fentanyl citrate                                 |
| 18166 | Morphine Sulphate                                |

---

---

|       |                                                |
|-------|------------------------------------------------|
| 39477 | Oxycodone hydrochloride/Naloxone hydrochloride |
| 6608  | Oxycodone hydrochloride                        |
| 53709 | Pethidine Hydrochloride                        |
| 40098 | Fentanyl citrate                               |
| 39505 | Tramadol hydrochloride                         |
| 9137  | Morphine sulfate                               |
| 59473 | Buprenorphine                                  |
| 21797 | Tramadol hydrochloride                         |
| 67830 | Fentanyl                                       |
| 49940 | Oxycodone hydrochloride                        |
| 3378  | Tramadol hydrochloride                         |
| 58217 | Oxycodone hydrochloride                        |
| 11129 | Papaveretum                                    |
| 60477 | Fentanyl                                       |
| 71310 | Buprenorphine                                  |
| 21285 | Hydromorphone hydrochloride                    |
| 47985 | Morphine sulfate                               |
| 63340 | Fentanyl citrate                               |
| 4476  | Morphine sulfate                               |
| 39498 | Naloxone hydrochloride/Oxycodone hydrochloride |
| 607   | Morphine sulfate                               |
| 11801 | Meptazinol hydrochloride                       |
| 10021 | Oxycodone hydrochloride                        |
| 54520 | Morphine Sulphate                              |
| 13225 | Morphine sulfate                               |
| 4999  | Tramadol Hydrochloride                         |
| 45745 | Oxycodone hydrochloride                        |
| 55365 | Morphine sulfate                               |
| 45788 | Oxycodone hydrochloride                        |
| 70124 | Buprenorphine                                  |
| 19477 | Morphine sulfate                               |
| 15793 | Diamorphine hydrochloride                      |
| 7999  | Diamorphine Hydrochloride                      |
| 41550 | Pethidine Hydrochloride                        |
| 14226 | Morphine sulfate                               |
| 35085 | Oxycodone hydrochloride                        |
| 46159 | Tapentadol hydrochloride                       |
| 41673 | Morphine sulfate                               |
| 43513 | Tramadol hydrochloride                         |
| 68172 | Buprenorphine                                  |
| 43152 | Fentanyl                                       |
| 6558  | Paracetamol/Tramadol hydrochloride             |
| 43315 | Morphine sulfate                               |
| 52977 | Tramadol hydrochloride                         |
| 9209  | Dihydrocodeine tartrate                        |
| 20005 | Morphine sulfate                               |

---



---

|       |                                    |
|-------|------------------------------------|
| 31253 | Pethidine Hydrochloride            |
| 60146 | Oxycodone hydrochloride            |
| 50929 | Fentanyl                           |
| 62778 | Paracetamol/Tramadol hydrochloride |
| 31935 | Pethidine hydrochloride            |
| 5681  | Morphine sulfate                   |
| 49791 | Oxycodone hydrochloride            |
| 51896 | Oxycodone hydrochloride            |
| 44371 | Tramadol hydrochloride             |
| 11746 | Tramadol hydrochloride             |
| 66729 | Tramadol hydrochloride             |
| 715   | Morphine Sulphate                  |
| 38326 | Fentanyl                           |
| 17386 | Pethidine hydrochloride            |
| 12889 | Morphine sulfate                   |
| 53106 | Morphine sulfate                   |
| 60943 | Buprenorphine                      |
| 19449 | Morphine sulfate                   |
| 25199 | Fentanyl citrate                   |
| 6892  | Morphine Sulphate                  |
| 11734 | Tramadol hydrochloride             |
| 9342  | Morphine sulfate                   |
| 5670  | Diamorphine Hydrochloride          |
| 45790 | Oxycodone hydrochloride            |
| 34786 | Diamorphine hydrochloride          |
| 14156 | Morphine sulfate                   |
| 64965 | Oxycodone hydrochloride            |
| 826   | Pethidine hydrochloride            |
| 68889 | Buprenorphine                      |
| 61836 | Oxycodone hydrochloride            |
| 70123 | Oxycodone hydrochloride            |
| 9602  | Morphine sulfate                   |
| 63593 | Morphine sulfate                   |
| 4280  | Morphine sulfate                   |
| 58853 | Oxycodone hydrochloride            |
| 41668 | Morphine hydrochloride             |
| 38956 | Tramadol hydrochloride             |
| 41674 | Morphine sulfate                   |
| 7114  | Diamorphine Hydrochloride          |
| 34771 | Morphine Sulphate                  |
| 58836 | Morphine sulfate                   |
| 46733 | Fentanyl                           |
| 23375 | Dextromoramide Tartrate            |
| 63714 | Oxycodone hydrochloride            |
| 52809 | Oxycodone hydrochloride            |
| 6708  | Oxycodone hydrochloride            |

---

---

|       |                                                |
|-------|------------------------------------------------|
| 61086 | Fentanyl                                       |
| 7082  | Fentanyl                                       |
| 68427 | Tramadol hydrochloride                         |
| 69559 | Oxycodone hydrochloride                        |
| 52217 | Oxycodone hydrochloride                        |
| 52605 | Tramadol hydrochloride                         |
| 65689 | Dihydrocodeine tartrate                        |
| 64781 | Morphine sulfate                               |
| 7875  | Morphine sulfate                               |
| 34281 | Tramadol Hydrochloride                         |
| 6458  | Diamorphine Hydrochloride                      |
| 7334  | Buprenorphine                                  |
| 63182 | Pethidine hydrochloride                        |
| 620   | Fentanyl                                       |
| 64552 | Oxycodone hydrochloride                        |
| 55221 | Diamorphine hydrochloride                      |
| 9615  | Hydromorphone hydrochloride                    |
| 8416  | Tramadol Hydrochloride                         |
| 60196 | Oxycodone hydrochloride                        |
| 39842 | Meptazinol hydrochloride                       |
| 58766 | Buprenorphine                                  |
| 38521 | Dihydrocodeine tartrate                        |
| 64426 | Oxycodone hydrochloride                        |
| 67356 | Buprenorphine                                  |
| 66689 | Buprenorphine                                  |
| 46559 | Fentanyl                                       |
| 35093 | Morphine sulfate                               |
| 6181  | Buprenorphine                                  |
| 71170 | Pentazocine hydrochloride                      |
| 39723 | Fentanyl citrate                               |
| 2966  | Pethidine Hydrochloride                        |
| 462   | Codeine phosphate                              |
| 60751 | Tramadol hydrochloride                         |
| 19972 | Hydromorphone hydrochloride                    |
| 64780 | Morphine sulfate                               |
| 9874  | Oxycodone hydrochloride                        |
| 39419 | Dextromoramide tartrate                        |
| 40616 | Oxycodone hydrochloride/Naloxone hydrochloride |
| 32425 | Oxycodone hydrochloride                        |
| 11584 | Buprenorphine                                  |
| 123   | Pentazocine Lactate                            |
| 34639 | Tramadol hydrochloride                         |
| 38970 | Dihydrocodeine tartrate                        |
| 320   | Buprenorphine Hydrochloride                    |
| 69023 | Fentanyl                                       |
| 39987 | Fentanyl citrate                               |

---

---

|       |                                                |
|-------|------------------------------------------------|
| 8866  | Diamorphine hydrochloride                      |
| 46659 | Tapentadol hydrochloride                       |
| 39475 | Oxycodone hydrochloride/Naloxone hydrochloride |
| 65168 | Fentanyl                                       |
| 9325  | Hydromorphone hydrochloride                    |
| 4114  | Tramadol hydrochloride                         |
| 42208 | Dihydrocodeine tartrate                        |
| 52495 | Tramadol hydrochloride                         |
| 64417 | Morphine sulfate                               |
| 50671 | Fentanyl                                       |
| 7406  | Oxycodone hydrochloride                        |
| 41722 | Diamorphine hydrochloride                      |
| 5657  | Fentanyl                                       |
| 11101 | Tramadol hydrochloride                         |
| 41976 | Tramadol hydrochloride                         |
| 39709 | Tramadol hydrochloride                         |
| 53113 | Oxycodone hydrochloride                        |
| 56544 | Morphine sulfate                               |
| 42380 | Morphine Sulphate                              |
| 6917  | Buprenorphine                                  |
| 31107 | Tramadol hydrochloride                         |
| 17398 | Morphine tartrate/Cyclizine tartrate           |
| 69063 | Hydromorphone hydrochloride                    |
| 6040  | Buprenorphine                                  |
| 68472 | Buprenorphine                                  |
| 30049 | Morphine Sulphate                              |
| 9672  | Morphine sulfate                               |
| 61779 | Oxycodone hydrochloride                        |
| 46022 | Tapentadol hydrochloride                       |
| 30761 | Diamorphine hydrochloride                      |
| 11342 | Morphine sulfate                               |
| 37923 | Fentanyl                                       |
| 45092 | Fentanyl citrate                               |
| 59146 | Buprenorphine                                  |
| 23981 | Tramadol hydrochloride                         |
| 38351 | Fentanyl                                       |
| 42576 | Fentanyl                                       |
| 61241 | Morphine sulfate                               |
| 757   | Fentanyl                                       |
| 7729  | Morphine Hydrochloride                         |
| 31582 | Pentazocine lactate                            |
| 58493 | Oxycodone hydrochloride                        |
| 46560 | Fentanyl                                       |
| 10583 | Pentazocine Lactate                            |
| 60507 | Morphine sulfate                               |
| 32450 | Tramadol hydrochloride                         |

---

---

|       |                                                                                                 |
|-------|-------------------------------------------------------------------------------------------------|
| 63332 | Oxycodone hydrochloride                                                                         |
| 5843  | Oxycodone hydrochloride                                                                         |
| 34477 | Morphine sulfate                                                                                |
| 48880 | Diamorphine hydrochloride                                                                       |
| 20783 | Morphine sulfate                                                                                |
| 9012  | Morphine tartrate/Cyclizine tartrate                                                            |
| 28711 | Diamorphine Hydrochloride                                                                       |
| 49323 | Tramadol hydrochloride                                                                          |
| 52220 | Oxycodone hydrochloride                                                                         |
| 40940 | Fentanyl citrate                                                                                |
| 15815 | Morphine sulfate                                                                                |
| 69795 | Buprenorphine                                                                                   |
| 24830 | Morphine Sulphate                                                                               |
| 41286 | Fentanyl citrate                                                                                |
| 56788 | Morphine sulfate                                                                                |
| 35347 | Tramadol Hydrochloride                                                                          |
| 7238  | Buprenorphine                                                                                   |
| 11843 | Fentanyl citrate                                                                                |
| 5585  | Oxycodone hydrochloride                                                                         |
| 65954 | Tramadol hydrochloride                                                                          |
| 72209 | Dihydrocodeine tartrate                                                                         |
| 3644  | Tramadol hydrochloride                                                                          |
| 72160 | Buprenorphine                                                                                   |
| 45830 | Oxycodone hydrochloride<br>Codeine Phosphate/Papaverine Hydrochloride/Morphine<br>Hydrochloride |
| 19764 | Hydrochloride                                                                                   |
| 61942 | Morphine sulfate                                                                                |
| 61423 | Morphine sulfate                                                                                |
| 5137  | Hydromorphone hydrochloride                                                                     |
| 53417 | Diamorphine hydrochloride                                                                       |
| 48953 | Diamorphine hydrochloride                                                                       |
| 59618 | Buprenorphine                                                                                   |
| 30514 | Diamorphine Hydrochloride                                                                       |
| 40508 | Fentanyl citrate                                                                                |
| 68402 | Buprenorphine                                                                                   |
| 40018 | Fentanyl citrate                                                                                |
| 64731 | Tramadol hydrochloride                                                                          |
| 7107  | Fentanyl                                                                                        |
| 8375  | Pentazocine hydrochloride                                                                       |
| 71462 | Morphine sulfate                                                                                |
| 70810 | Fentanyl                                                                                        |
| 52216 | Oxycodone hydrochloride                                                                         |
| 8740  | Morphine hydrochloride                                                                          |
| 61764 | Tapentadol hydrochloride                                                                        |
| 2957  | Morphine sulfate                                                                                |
| 18491 | Pethidine hydrochloride/Promethazine hydrochloride                                              |

---

---

|       |                             |
|-------|-----------------------------|
| 9313  | Dihydrocodeine tartrate     |
| 45936 | Tapentadol hydrochloride    |
| 47854 | Tramadol Hydrochloride      |
| 52592 | Oxycodone hydrochloride     |
| 40718 | Tramadol hydrochloride      |
| 67901 | Buprenorphine               |
| 64751 | Codeine phosphate           |
| 19092 | Morphine Sulphate           |
| 66121 | Dihydrocodeine tartrate     |
| 72646 | Tramadol hydrochloride      |
| 66837 | Oxycodone hydrochloride     |
| 7197  | Morphine Sulphate           |
| 354   | Morphine sulfate            |
| 39811 | Tramadol hydrochloride      |
| 69474 | Oxycodone hydrochloride     |
| 61584 | Morphine sulfate            |
| 42591 | Fentanyl                    |
| 29426 | Pethidine Hydrochloride     |
| 42913 | Diamorphine hydrochloride   |
| 45811 | Tapentadol hydrochloride    |
| 6298  | Fentanyl                    |
| 58039 | Oxycodone hydrochloride     |
| 34787 | Diamorphine hydrochloride   |
| 41348 | Fentanyl citrate            |
| 40926 | Tramadol hydrochloride      |
| 8456  | Dihydrocodeine tartrate     |
| 15792 | Hydromorphone hydrochloride |
| 64079 | Dihydrocodeine tartrate     |
| 8039  | Morphine sulfate            |
| 72457 | Morphine sulfate            |
| 68848 | Buprenorphine               |
| 65933 | Oxycodone hydrochloride     |
| 5028  | Tramadol Hydrochloride      |
| 45766 | Oxycodone hydrochloride     |
| 68241 | Buprenorphine               |
| 58190 | Pethidine hydrochloride     |
| 40166 | Tramadol hydrochloride      |
| 56022 | Pethidine hydrochloride     |
| 9928  | Oxycodone Hydrochloride     |
| 60158 | Oxycodone hydrochloride     |
| 6609  | Oxycodone hydrochloride     |
| 17893 | Morphine sulfate            |
| 17043 | Pethidine hydrochloride     |
| 47460 | Tapentadol hydrochloride    |
| 58710 | Morphine sulfate            |
| 655   | Morphine sulfate            |

---

---

|       |                             |
|-------|-----------------------------|
| 7389  | Oxycodone hydrochloride     |
| 46279 | Tramadol hydrochloride      |
| 5138  | Hydromorphone hydrochloride |
| 26021 | Fentanyl citrate            |
| 18801 | Morphine sulfate            |
| 51611 | Oxycodone hydrochloride     |
| 61936 | Oxycodone hydrochloride     |
| 71171 | Morphine sulfate            |
| 64150 | Oxycodone hydrochloride     |
| 9371  | Morphine sulfate            |
| 45549 | Fentanyl                    |
| 701   | Tramadol hydrochloride      |
| 47555 | Morphine sulfate            |
| 67766 | Fentanyl                    |
| 21397 | Tramadol hydrochloride      |
| 50733 | Oxycodone hydrochloride     |
| 6736  | Morphine sulfate            |
| 72342 | Fentanyl                    |
| 10925 | Meptazinol hydrochloride    |
| 61156 | Fentanyl                    |
| 64860 | Morphine sulfate            |
| 40060 | Tramadol hydrochloride      |
| 66280 | Buprenorphine               |
| 53181 | Diamorphine hydrochloride   |
| 27749 | Morphine Sulphate           |
| 44487 | Fentanyl                    |
| 39798 | Tramadol hydrochloride      |
| 48158 | Diamorphine hydrochloride   |
| 42021 | Fentanyl                    |
| 15337 | Fentanyl citrate            |
| 37831 | Tramadol hydrochloride      |
| 9484  | Morphine Sulphate           |
| 7275  | Oxycodone hydrochloride     |
| 46187 | Oxycodone hydrochloride     |
| 9053  | Diamorphine Hydrochloride   |
| 9330  | Hydromorphone hydrochloride |
| 60170 | Buprenorphine               |
| 24736 | Hydromorphone hydrochloride |
| 16189 | Morphine Sulphate           |
| 14063 | Morphine sulfate            |
| 57623 | Morphine sulfate            |
| 13117 | Morphine sulfate            |
| 17943 | Morphine sulfate            |
| 249   | Pethidine Hydrochloride     |
| 6234  | Dihydrocodeine tartrate     |
| 65390 | Oxycodone hydrochloride     |

---

---

|       |                             |
|-------|-----------------------------|
| 86    | Tramadol hydrochloride      |
| 59057 | Fentanyl citrate            |
| 39799 | Fentanyl citrate            |
| 68888 | Buprenorphine               |
| 48913 | Diamorphine hydrochloride   |
| 38092 | Pentazocine Lactate         |
| 58737 | Pethidine hydrochloride     |
| 62322 | Oxycodone hydrochloride     |
| 2041  | Dihydrocodeine tartrate     |
| 18700 | Morphine sulfate            |
| 34065 | Tramadol Hydrochloride      |
| 69254 | Buprenorphine               |
| 20310 | Tramadol hydrochloride      |
| 46461 | Tapentadol hydrochloride    |
| 65359 | Fentanyl                    |
| 59392 | Buprenorphine               |
| 27058 | Morphine sulfate            |
| 10239 | Morphine sulfate            |
| 13420 | Diamorphine hydrochloride   |
| 36732 | Tramadol hydrochloride      |
| 64333 | Oxycodone hydrochloride     |
| 58879 | Morphine hydrochloride      |
| 67744 | Tramadol hydrochloride      |
| 2367  | Pentazocine hydrochloride   |
| 62689 | Morphine hydrochloride      |
| 61400 | Morphine sulfate            |
| 36697 | Tramadol hydrochloride      |
| 45894 | Fentanyl citrate            |
| 5936  | Buprenorphine               |
| 7457  | Buprenorphine Hydrochloride |
| 40752 | Oxycodone hydrochloride     |
| 11275 | Tramadol hydrochloride      |
| 72265 | Dihydrocodeine tartrate     |
| 21777 | Tramadol hydrochloride      |
| 67425 | Fentanyl                    |
| 66619 | Oxycodone hydrochloride     |
| 13300 | Buprenorphine               |
| 60489 | Codeine phosphate           |
| 61506 | Morphine sulfate            |
| 71355 | Tramadol hydrochloride      |
| 14394 | Phenazocine Hydrobromide    |
| 48604 | Morphine sulfate            |
| 26986 | Tramadol hydrochloride      |
| 1503  | Morphine sulfate            |
| 60518 | Morphine sulfate            |
| 48128 | Pethidine hydrochloride     |

---

---

|       |                                                |
|-------|------------------------------------------------|
| 39251 | Fentanyl                                       |
| 66298 | Oxycodone hydrochloride                        |
| 39518 | Fentanyl citrate                               |
| 40883 | Tramadol hydrochloride                         |
| 8040  | Diamorphine Hydrochloride                      |
| 37021 | Tramadol hydrochloride                         |
| 50095 | Oxycodone hydrochloride                        |
| 67599 | Pethidine hydrochloride                        |
| 15964 | Morphine sulfate                               |
| 34730 | Dihydrocodeine tartrate                        |
| 659   | Morphine Sulphate                              |
| 17936 | Morphine sulfate                               |
| 16395 | Tramadol hydrochloride                         |
| 635   | Codeine phosphate                              |
| 32831 | Pethidine Hydrochloride                        |
| 9331  | Hydromorphone hydrochloride                    |
| 63198 | Oxycodone hydrochloride                        |
| 6215  | Tramadol hydrochloride                         |
| 6769  | Oxycodone hydrochloride                        |
| 2997  | Morphine sulfate                               |
| 42280 | Paracetamol/Tramadol hydrochloride             |
| 9396  | Tramadol hydrochloride                         |
| 37960 | Fentanyl                                       |
| 39478 | Naloxone hydrochloride/Oxycodone hydrochloride |
| 34570 | Tramadol hydrochloride                         |
| 36949 | Tramadol hydrochloride                         |
| 64871 | Tramadol hydrochloride                         |
| 66760 | Oxycodone hydrochloride                        |
| 56581 | Alfentanil Hydrochloride                       |
| 46018 | Tapentadol hydrochloride                       |
| 64807 | Oxycodone hydrochloride                        |
| 9337  | Morphine sulfate                               |
| 68743 | Buprenorphine                                  |
| 22066 | Fentanyl                                       |
| 69315 | Buprenorphine                                  |
| 67197 | Tramadol hydrochloride                         |
| 66606 | Oxycodone hydrochloride                        |
| 11838 | Morphine sulfate                               |
| 72255 | Morphine sulfate                               |
| 54790 | Pethidine hydrochloride                        |
| 60766 | Fentanyl                                       |
| 3165  | Diamorphine Hydrochloride                      |
| 15353 | Papaveretum                                    |
| 48571 | Fentanyl                                       |
| 37703 | Pethidine hydrochloride                        |
| 38196 | Tramadol hydrochloride                         |

---



---

|       |                           |
|-------|---------------------------|
| 7800  | Dextromoramide Tartrate   |
| 30698 | Diamorphine Hydrochloride |
| 19291 | Morphine sulfate          |
| 63898 | Tramadol hydrochloride    |
| 13172 | Morphine sulfate          |
| 68167 | Buprenorphine             |
| 20815 | Morphine sulfate          |
| 40805 | Tramadol hydrochloride    |
| 23625 | Tramadol hydrochloride    |
| 69993 | Oxycodone hydrochloride   |
| 53116 | Oxycodone hydrochloride   |
| 15339 | Diamorphine hydrochloride |
| 16618 | Fentanyl                  |
| 65437 | Fentanyl                  |
| 47759 | Fentanyl citrate          |
| 29577 | Fentanyl citrate          |
| 59584 | Morphine sulfate          |
| 35656 | Tramadol hydrochloride    |
| 68833 | Tramadol hydrochloride    |
| 5696  | Fentanyl citrate          |
| 31033 | Diamorphine Hydrochloride |
| 8447  | Meptazinol hydrochloride  |
| 59443 | Fentanyl citrate          |
| 56671 | Buprenorphine             |
| 53918 | Morphine sulfate          |
| 43260 | Methadone Hydrochloride   |
| 36873 | Tramadol hydrochloride    |
| 60721 | Diamorphine hydrochloride |
| 50862 | Tramadol hydrochloride    |
| 67446 | Oxycodone hydrochloride   |
| 60082 | Morphine sulfate          |
| 59978 | Dihydrocodeine tartrate   |
| 6948  | Oxycodone hydrochloride   |
| 60121 | Tramadol hydrochloride    |
| 48434 | Diamorphine hydrochloride |
| 748   | Fentanyl                  |
| 37020 | Tramadol hydrochloride    |
| 53639 | Morphine sulfate          |
| 7126  | Fentanyl                  |
| 38103 | Pethidine Hydrochloride   |
| 21947 | Tramadol hydrochloride    |
| 66654 | Diamorphine hydrochloride |
| 67161 | Tramadol hydrochloride    |
| 187   | Tramadol hydrochloride    |
| 46555 | Fentanyl citrate          |
| 2450  | Pethidine hydrochloride   |

---

---

|       |                                                |
|-------|------------------------------------------------|
| 68479 | Buprenorphine                                  |
| 49787 | Oxycodone hydrochloride                        |
| 56491 | Tramadol hydrochloride                         |
| 68209 | Fentanyl                                       |
| 51384 | Oxycodone hydrochloride                        |
| 5991  | Morphine sulfate                               |
| 21868 | Cocaine/Diamorphine Hydrochloride              |
| 32688 | Diamorphine Hydrochloride                      |
| 24640 | Diamorphine Hydrochloride                      |
| 46021 | Tapentadol hydrochloride                       |
| 35968 | Fentanyl                                       |
| 57750 | Morphine sulfate                               |
| 6557  | Oxycodone hydrochloride                        |
| 29014 | Diamorphine Hydrochloride                      |
| 57033 | Oxycodone hydrochloride                        |
| 66470 | Buprenorphine                                  |
| 14490 | Tramadol hydrochloride                         |
| 22756 | Morphine sulfate                               |
| 26908 | Fentanyl citrate                               |
| 63139 | Fentanyl                                       |
| 39469 | Fentanyl citrate                               |
| 4236  | Dextromoramide tartrate                        |
| 50726 | Oxycodone hydrochloride                        |
| 60950 | Morphine sulfate                               |
| 34521 | Tramadol hydrochloride                         |
| 61272 | Tramadol hydrochloride                         |
| 6879  | Buprenorphine                                  |
| 13280 | Morphine sulfate                               |
| 40961 | Naloxone hydrochloride/Oxycodone hydrochloride |
| 67258 | Fentanyl                                       |
| 42798 | Tramadol hydrochloride                         |
| 34808 | Tramadol hydrochloride                         |
| 5664  | Morphine hydrochloride                         |
| 38553 | Fentanyl                                       |
| 58114 | Oxycodone hydrochloride                        |
| 10309 | Dihydrocodeine tartrate                        |
| 70139 | Buprenorphine                                  |
| 5652  | Morphine Sulphate                              |
| 42538 | Fentanyl citrate                               |
| 32165 | Tramadol hydrochloride                         |
| 49324 | Tramadol hydrochloride                         |
| 54354 | Dihydrocodeine tartrate                        |
| 40427 | Alfentanil Hydrochloride                       |
| 43720 | Alfentanil hydrochloride                       |
| 60296 | Remifentanyl hydrochloride                     |
| 43384 | Alfentanil hydrochloride                       |

---

---

|       |                                                    |
|-------|----------------------------------------------------|
| 28567 | Alfentanil Hydrochloride                           |
| 23906 | Alfentanil hydrochloride                           |
| 35500 | Alfentanil hydrochloride                           |
| 38183 | Remifentanyl hydrochloride                         |
| 36185 | Alfentanil hydrochloride                           |
| 38524 | Alfentanil hydrochloride                           |
| 24790 | Alfentanil Hydrochloride                           |
| 32381 | Alfentanil hydrochloride                           |
| 26115 | Papaveretum/Hyoscine hydrobromide                  |
| 22571 | Morphine Sulphate/Atropine Sulphate                |
| 28732 | Hyoscine Hydrobromide/Papaveretum                  |
| 29304 | Methadone hydrochloride                            |
| 71695 | Buprenorphine hydrochloride                        |
| 61100 | Buprenorphine hydrochloride                        |
| 6547  | Buprenorphine hydrochloride                        |
| 40212 | Buprenorphine hydrochloride                        |
| 17671 | Methadone hydrochloride                            |
| 64155 | Buprenorphine hydrochloride                        |
| 46578 | Methadone hydrochloride                            |
| 6056  | Buprenorphine hydrochloride                        |
| 63788 | Buprenorphine hydrochloride                        |
| 50380 | Buprenorphine hydrochloride                        |
| 33832 | Methadone hydrochloride                            |
| 30531 | Methadone hydrochloride                            |
| 62675 | Buprenorphine hydrochloride                        |
| 40211 | Buprenorphine hydrochloride                        |
| 38311 | Buprenorphine Hydrochloride/Naloxone Hydrochloride |
| 57454 | Buprenorphine hydrochloride                        |
| 13031 | Buprenorphine hydrochloride                        |
| 62776 | Buprenorphine hydrochloride                        |
| 37507 | Methadone hydrochloride                            |
| 37518 | Methadone hydrochloride                            |
| 24584 | Methadone hydrochloride                            |
| 66921 | Methadone hydrochloride                            |
| 62874 | Buprenorphine hydrochloride                        |
| 36436 | Methadone hydrochloride                            |
| 68959 | Methadone hydrochloride                            |
| 69942 | Buprenorphine hydrochloride                        |
| 63640 | Buprenorphine hydrochloride                        |
| 26277 | Methadone hydrochloride                            |
| 39437 | Methadone hydrochloride                            |
| 41608 | Methadone hydrochloride                            |
| 71630 | Buprenorphine hydrochloride                        |
| 59295 | Methadone hydrochloride                            |
| 69053 | Methadone hydrochloride                            |
| 32237 | Methadone hydrochloride                            |

---

---

|       |                                                                   |
|-------|-------------------------------------------------------------------|
| 40473 | Buprenorphine hydrochloride                                       |
| 70267 | Methadone hydrochloride                                           |
| 14086 | Methadone Hydrochloride                                           |
| 396   | Buprenorphine hydrochloride                                       |
| 6210  | Buprenorphine hydrochloride                                       |
| 70464 | Buprenorphine hydrochloride                                       |
| 60053 | Buprenorphine hydrochloride                                       |
| 41720 | Methadone hydrochloride                                           |
| 55825 | Methadone hydrochloride                                           |
| 3522  | Buprenorphine hydrochloride                                       |
| 67342 | Methadone hydrochloride                                           |
| 64847 | Buprenorphine hydrochloride                                       |
| 35269 | Buprenorphine hydrochloride                                       |
| 33068 | Methadone hydrochloride                                           |
| 17896 | Methadone Hydrochloride                                           |
| 2952  | Methadone hydrochloride                                           |
| 3064  | Buprenorphine hydrochloride                                       |
| 47706 | Methadone hydrochloride                                           |
| 64463 | Methadone hydrochloride                                           |
| 9728  | Methadone hydrochloride                                           |
| 58273 | Buprenorphine hydrochloride                                       |
| 8017  | Buprenorphine hydrochloride                                       |
| 63077 | Methadone hydrochloride                                           |
| 21562 | Methadone hydrochloride                                           |
| 10077 | Buprenorphine hydrochloride                                       |
| 62969 | Buprenorphine hydrochloride                                       |
| 28328 | Methadone hydrochloride                                           |
| 24440 | Methadone hydrochloride                                           |
| 42074 | Buprenorphine Hydrochloride/Naloxone Hydrochloride                |
| 35506 | Methadone hydrochloride                                           |
| 59970 | Buprenorphine hydrochloride                                       |
| 65157 | Buprenorphine hydrochloride                                       |
| 29898 | Morphine sulfate                                                  |
| 11971 | Cocaine hydrochloride/Morphine hydrochloride/Ethanol<br>90%/Syrup |
| 39461 | Ibuprofen/Codeine phosphate                                       |
| 11554 | Ibuprofen/Codeine phosphate                                       |
| 12709 | Codeine Phosphate/Ibuprofen                                       |
| 53617 | Ibuprofen/Codeine phosphate                                       |
| 69285 | Ibuprofen/Codeine phosphate                                       |
| 13893 | Ibuprofen/Codeine phosphate                                       |
| 60080 | Alfentanil hydrochloride                                          |
| 48183 | Fentanyl citrate                                                  |
| 35853 | Fentanyl citrate                                                  |
| 25185 | Fentanyl Citrate                                                  |
| 43812 | Fentanyl citrate                                                  |

---

|              |                                                       |
|--------------|-------------------------------------------------------|
| 35330        | Fentanyl citrate                                      |
| 617          | Fentanyl Citrate                                      |
| 59678        | Fentanyl citrate                                      |
| 63398        | Fentanyl citrate                                      |
| 52178        | Fentanyl citrate                                      |
| 60040        | Buclizine hydrochloride/Paracetamol/Codeine phosphate |
| 1616         | Buclizine hydrochloride/Paracetamol/Codeine phosphate |
| 18468        | Peppermint oil/Morphine anhydrous                     |
| 23063        | Peppermint oil/Morphine anhydrous                     |
| 33954        | Pethidine Hydrochloride/Promethazine Hydrochloride    |
| Product Code | Substance Name                                        |
| 179          | Metoclopramide hydrochloride                          |
| 299          | Metoclopramide Hydrochloride                          |
| 304          | Metoclopramide hydrochloride                          |
| 405          | Metoclopramide hydrochloride                          |
| 455          | Metoclopramide hydrochloride                          |
| 511          | Metoclopramide hydrochloride                          |
| 890          | Paracetamol/Metoclopramide hydrochloride              |
| 892          | Metoclopramide hydrochloride/Paracetamol              |
| 1724         | Metoclopramide hydrochloride                          |
| 2306         | Metoclopramide hydrochloride/Paracetamol              |
|              | Metoclopramide Hydrochloride/Citric Acid/Sodium       |
| 3155         | Bicarbonate/Aspirin                                   |
|              | Metoclopramide Hydrochloride/Citric Acid/Sodium       |
| 3386         | Bicarbonate/Aspirin                                   |
| 3514         | Paracetamol/Metoclopramide hydrochloride              |
| 3716         | Metoclopramide hydrochloride                          |
|              | Metoclopramide Hydrochloride/Citric Acid/Sodium       |
| 3726         | Bicarbonate/Aspirin                                   |
| 4142         | Metoclopramide Hydrochloride                          |
| 4892         | Metoclopramide hydrochloride                          |
| 5081         | Metoclopramide hydrochloride                          |
| 5288         | Aspirin DL-Lysine/Metoclopramide hydrochloride        |
| 6521         | Metoclopramide Hydrochloride                          |
| 8273         | Metoclopramide hydrochloride                          |
| 8386         | Metoclopramide hydrochloride                          |
| 8525         | Metoclopramide hydrochloride                          |
| 8784         | Metoclopramide hydrochloride                          |
| 9118         | Metoclopramide hydrochloride                          |
| 11576        | Metoclopramide hydrochloride                          |
| 12778        | Metoclopramide Hydrochloride/Paracetamol              |
| 12869        | Metoclopramide Hydrochloride/Paracetamol              |
| 12976        | Aspirin DL-Lysine/Metoclopramide hydrochloride        |
| 13034        | Metoclopramide Hydrochloride                          |
| 14844        | Metoclopramide hydrochloride                          |
| 15601        | Metoclopramide hydrochloride                          |

---

|       |                                                                     |
|-------|---------------------------------------------------------------------|
| 17180 | Metoclopramide Hydrochloride/Citric Acid/Sodium Bicarbonate/Aspirin |
| 17456 | Metoclopramide Hydrochloride/Aspirin Lysine                         |
| 17496 | Metoclopramide hydrochloride                                        |
| 17832 | Metoclopramide Hydrochloride                                        |
| 17946 | Metoclopramide Hydrochloride                                        |
| 21863 | Metoclopramide hydrochloride                                        |
| 23753 | Metoclopramide Hydrochloride                                        |
| 25992 | Metoclopramide hydrochloride                                        |
| 25994 | Metoclopramide hydrochloride                                        |
| 26363 | Metoclopramide hydrochloride                                        |
| 33229 | Metoclopramide hydrochloride                                        |
| 34084 | Metoclopramide hydrochloride                                        |
| 34325 | Metoclopramide hydrochloride                                        |
| 34887 | Metoclopramide hydrochloride                                        |
| 35046 | Metoclopramide hydrochloride                                        |
| 39621 | Metoclopramide hydrochloride                                        |
| 39653 | Metoclopramide hydrochloride                                        |
| 39710 | Metoclopramide hydrochloride                                        |
| 43448 | Metoclopramide hydrochloride                                        |
| 47547 | Metoclopramide hydrochloride                                        |
| 48445 | Metoclopramide hydrochloride                                        |
| 52677 | Metoclopramide hydrochloride                                        |
| 53162 | Metoclopramide hydrochloride                                        |
| 60428 | Metoclopramide hydrochloride                                        |
| 61961 | Metoclopramide hydrochloride                                        |
| 63059 | Metoclopramide hydrochloride                                        |
| 64838 | Metoclopramide hydrochloride                                        |
| 65488 | Metoclopramide hydrochloride                                        |
| 66770 | Metoclopramide hydrochloride                                        |
| 68024 | Metoclopramide hydrochloride                                        |

---

**Supplementary Table S4** Product codes for medication with the potential to delay gastric emptying

*Opioid analgesics*

| Product Code | Substance Name                               |
|--------------|----------------------------------------------|
| 11           | Paracetamol/Dihydrocodeine tartrate          |
| 19           | Paracetamol/Codeine phosphate                |
| 53           | Dihydrocodeine tartrate                      |
| 57           | Codeine phosphate/Paracetamol                |
| 86           | Tramadol hydrochloride                       |
| 96           | Codeine phosphate/Paracetamol                |
| 123          | Pentazocine Lactate                          |
| 158          | Codeine phosphate                            |
| 187          | Tramadol hydrochloride                       |
| 191          | Dihydrocodeine tartrate                      |
| 213          | Codeine phosphate                            |
| 234          | Pethidine Hydrochloride                      |
| 249          | Pethidine Hydrochloride                      |
| 306          | Codeine Phosphate/Caffeine/Aspirin           |
| 320          | Buprenorphine Hydrochloride                  |
| 328          | Pentazocine hydrochloride                    |
| 354          | Morphine sulfate                             |
| 382          | Codeine phosphate                            |
| 396          | Buprenorphine hydrochloride                  |
| 423          | Pethidine Hydrochloride                      |
| 458          | Morphine Sulphate                            |
| 462          | Codeine phosphate                            |
| 483          | Dextropropoxyphene Hydrochloride/Paracetamol |
| 495          | Morphine sulfate                             |
| 539          | Codeine phosphate                            |
| 607          | Morphine sulfate                             |
| 617          | Fentanyl Citrate                             |
| 620          | Fentanyl                                     |
| 625          | Codeine phosphate/Paracetamol                |
| 635          | Codeine phosphate                            |
| 655          | Morphine sulfate                             |
| 656          | Codeine phosphate/Paracetamol                |
| 659          | Morphine Sulphate                            |
| 687          | Paracetamol/Tramadol hydrochloride           |
| 701          | Tramadol hydrochloride                       |
| 715          | Morphine Sulphate                            |
| 748          | Fentanyl                                     |
| 757          | Fentanyl                                     |
| 767          | Codeine phosphate/Paracetamol                |
| 800          | Codeine phosphate/Paracetamol                |
| 810          | Codeine phosphate/Paracetamol                |

---

|      |                                                       |
|------|-------------------------------------------------------|
| 826  | Pethidine hydrochloride                               |
| 1503 | Morphine sulfate                                      |
| 1616 | Buclizine hydrochloride/Paracetamol/Codeine phosphate |
| 1640 | Codeine phosphate/Paracetamol                         |
| 1762 | Dextropropoxyphene Hydrochloride/Paracetamol          |
| 2040 | Paracetamol/Dihydrocodeine tartrate                   |
| 2041 | Dihydrocodeine tartrate                               |
| 2047 | Codeine Phosphate/Aspirin                             |
| 2211 | Codeine phosphate/Paracetamol                         |
| 2367 | Pentazocine hydrochloride                             |
| 2450 | Pethidine hydrochloride                               |
| 2462 | Paracetamol/Dextropropoxyphene hydrochloride          |
| 2555 | Dihydrocodeine Tartrate/Paracetamol                   |
| 2794 | Codeine phosphate/Paracetamol                         |
| 2846 | Codeine Phosphate/Paracetamol                         |
| 2917 | Codeine Phosphate/Paracetamol                         |
| 2952 | Methadone hydrochloride                               |
| 2957 | Morphine sulfate                                      |
| 2966 | Pethidine Hydrochloride                               |
| 2997 | Morphine sulfate                                      |
| 3064 | Buprenorphine hydrochloride                           |
| 3156 | Codeine phosphate/Paracetamol                         |
| 3165 | Diamorphine Hydrochloride                             |
| 3185 | Codeine Phosphate/Paracetamol                         |
| 3239 | Meptazinol hydrochloride                              |
| 3378 | Tramadol hydrochloride                                |
| 3435 | Codeine phosphate/Paracetamol                         |
| 3522 | Buprenorphine hydrochloride                           |
| 3644 | Tramadol hydrochloride                                |
| 3653 | Dihydrocodeine tartrate                               |
| 3698 | Dihydrocodeine tartrate                               |
| 3713 | Paracetamol/Codeine phosphate                         |
| 3724 | Paracetamol/Codeine phosphate                         |
| 3919 | Morphine sulfate                                      |
| 3990 | Dextromoramide tartrate                               |
| 4114 | Tramadol hydrochloride                                |
| 4115 | Tramadol hydrochloride                                |
| 4236 | Dextromoramide tartrate                               |
| 4266 | Morphine sulfate                                      |
| 4280 | Morphine sulfate                                      |
| 4369 | Codeine phosphate                                     |
| 4476 | Morphine sulfate                                      |
| 4477 | Morphine sulfate                                      |
| 4556 | Paracetamol/Dihydrocodeine tartrate                   |
| 4607 | Paracetamol/Dextropropoxyphene hydrochloride          |
| 4671 | Codeine Phosphate/Paracetamol                         |

---



---

|      |                                      |
|------|--------------------------------------|
| 4691 | Fentanyl                             |
| 4693 | Morphine sulfate                     |
| 4805 | Codeine Phosphate                    |
| 4823 | Dihydrocodeine tartrate              |
| 4834 | Tramadol hydrochloride               |
| 4950 | Dihydrocodeine Tartrate/Paracetamol  |
| 4999 | Tramadol Hydrochloride               |
| 5028 | Tramadol Hydrochloride               |
| 5048 | Fentanyl                             |
| 5079 | Diamorphine Hydrochloride            |
| 5137 | Hydromorphone hydrochloride          |
| 5138 | Hydromorphone hydrochloride          |
| 5169 | Tramadol hydrochloride               |
| 5257 | Tramadol Hydrochloride               |
| 5322 | Methadone hydrochloride              |
| 5555 | Morphine sulfate                     |
| 5563 | Morphine Sulphate                    |
| 5585 | Oxycodone hydrochloride              |
| 5599 | Oxycodone hydrochloride              |
| 5651 | Fentanyl citrate                     |
| 5652 | Morphine Sulphate                    |
| 5657 | Fentanyl                             |
| 5664 | Morphine hydrochloride               |
| 5668 | Diamorphine Hydrochloride            |
| 5670 | Diamorphine Hydrochloride            |
| 5681 | Morphine sulfate                     |
| 5696 | Fentanyl citrate                     |
| 5697 | Fentanyl citrate                     |
| 5714 | Morphine sulfate                     |
| 5833 | Cyclizine tartrate/Morphine tartrate |
| 5840 | Morphine sulfate                     |
| 5843 | Oxycodone hydrochloride              |
| 5936 | Buprenorphine                        |
| 5955 | Dihydrocodeine tartrate/Paracetamol  |
| 5991 | Morphine sulfate                     |
| 6002 | Morphine sulfate                     |
| 6040 | Buprenorphine                        |
| 6056 | Buprenorphine hydrochloride          |
| 6153 | Tramadol hydrochloride               |
| 6181 | Buprenorphine                        |
| 6210 | Buprenorphine hydrochloride          |
| 6215 | Tramadol hydrochloride               |
| 6232 | Morphine sulfate                     |
| 6234 | Dihydrocodeine tartrate              |
| 6269 | Morphine sulfate                     |
| 6298 | Fentanyl                             |

---

---

|      |                                        |
|------|----------------------------------------|
| 6366 | Morphine sulfate                       |
| 6414 | Oxycodone Hydrochloride                |
| 6441 | Methadone hydrochloride                |
| 6458 | Diamorphine Hydrochloride              |
| 6459 | Diamorphine Hydrochloride              |
| 6547 | Buprenorphine hydrochloride            |
| 6557 | Oxycodone hydrochloride                |
| 6558 | Paracetamol/Tramadol hydrochloride     |
| 6608 | Oxycodone hydrochloride                |
| 6609 | Oxycodone hydrochloride                |
| 6708 | Oxycodone hydrochloride                |
| 6736 | Morphine sulfate                       |
| 6769 | Oxycodone hydrochloride                |
| 6790 | Oxycodone hydrochloride                |
| 6879 | Buprenorphine                          |
| 6886 | Codeine Phosphate/Paracetamol          |
| 6892 | Morphine Sulphate                      |
| 6917 | Buprenorphine                          |
| 6948 | Oxycodone hydrochloride                |
| 7063 | Paracetamol/Dihydrocodeine tartrate    |
| 7072 | Codeine phosphate/Paracetamol          |
| 7082 | Fentanyl                               |
| 7107 | Fentanyl                               |
| 7114 | Diamorphine Hydrochloride              |
| 7126 | Fentanyl                               |
| 7167 | Oxycodone hydrochloride                |
| 7197 | Morphine Sulphate                      |
| 7236 | Buprenorphine                          |
| 7238 | Buprenorphine                          |
| 7275 | Oxycodone hydrochloride                |
| 7334 | Buprenorphine                          |
| 7372 | Oxycodone hydrochloride                |
| 7389 | Oxycodone hydrochloride                |
| 7397 | Fentanyl                               |
| 7406 | Oxycodone hydrochloride                |
| 7450 | Pentazocine Hydrochloride/Paracetamol  |
| 7457 | Buprenorphine Hydrochloride            |
| 7469 | Dihydrocodeine tartrate                |
| 7499 | Codeine Phosphate/Caffeine/Paracetamol |
| 7517 | Morphine sulfate                       |
| 7518 | Codeine Phosphate/Aspirin              |
| 7542 | Codeine Phosphate/Paracetamol          |
| 7555 | Buprenorphine                          |
| 7729 | Morphine Hydrochloride                 |
| 7800 | Dextromoramide Tartrate                |
| 7849 | Diamorphine Hydrochloride              |

---

---

|      |                                                  |
|------|--------------------------------------------------|
| 7875 | Morphine sulfate                                 |
| 7999 | Diamorphine Hydrochloride                        |
| 8017 | Buprenorphine hydrochloride                      |
| 8039 | Morphine sulfate                                 |
| 8040 | Diamorphine Hydrochloride                        |
| 8075 | Morphine Sulphate                                |
| 8246 | Codeine Phosphate/Paracetamol                    |
| 8329 | Codeine Phosphate/Caffeine/Paracetamol           |
| 8335 | Codeine phosphate/Paracetamol                    |
| 8375 | Pentazocine hydrochloride                        |
| 8416 | Tramadol Hydrochloride                           |
| 8447 | Meptazinol hydrochloride                         |
| 8456 | Dihydrocodeine tartrate                          |
| 8735 | Diamorphine hydrochloride                        |
| 8740 | Morphine hydrochloride                           |
| 8822 | Morphine sulfate                                 |
| 8866 | Diamorphine hydrochloride                        |
| 8876 | Morphine sulfate                                 |
| 9001 | Cyclizine hydrochloride/Dipipanone hydrochloride |
| 9012 | Morphine tartrate/Cyclizine tartrate             |
| 9053 | Diamorphine Hydrochloride                        |
| 9137 | Morphine sulfate                                 |
| 9163 | Dihydrocodeine Tartrate/Paracetamol              |
| 9183 | Morphine sulfate                                 |
| 9209 | Dihydrocodeine tartrate                          |
| 9275 | Dihydrocodeine tartrate                          |
| 9313 | Dihydrocodeine tartrate                          |
| 9325 | Hydromorphone hydrochloride                      |
| 9330 | Hydromorphone hydrochloride                      |
| 9331 | Hydromorphone hydrochloride                      |
| 9332 | Hydromorphone hydrochloride                      |
| 9337 | Morphine sulfate                                 |
| 9342 | Morphine sulfate                                 |
| 9371 | Morphine sulfate                                 |
| 9381 | Morphine sulfate                                 |
| 9389 | Tramadol hydrochloride                           |
| 9396 | Tramadol hydrochloride                           |
| 9432 | Codeine Phosphate/Aspirin                        |
| 9457 | Codeine Phosphate/Paracetamol                    |
| 9460 | Codeine Phosphate/Paracetamol                    |
| 9462 | Codeine Phosphate/Paracetamol                    |
| 9484 | Morphine Sulphate                                |
| 9516 | Codeine phosphate/Paracetamol                    |
| 9557 | Morphine sulfate                                 |
| 9562 | Dihydrocodeine Tartrate/Paracetamol              |
| 9602 | Morphine sulfate                                 |

---

---

|       |                                        |
|-------|----------------------------------------|
| 9615  | Hydromorphone hydrochloride            |
| 9672  | Morphine sulfate                       |
| 9728  | Methadone hydrochloride                |
| 9742  | Codeine Phosphate/Caffeine/Paracetamol |
| 9785  | Dihydrocodeine tartrate/Paracetamol    |
| 9855  | Paracetamol/Dihydrocodeine tartrate    |
| 9874  | Oxycodone hydrochloride                |
| 9927  | Oxycodone hydrochloride                |
| 9928  | Oxycodone Hydrochloride                |
| 9945  | Diamorphine hydrochloride              |
| 9960  | Morphine Sulphate                      |
| 9973  | Oxycodone hydrochloride                |
| 10021 | Oxycodone hydrochloride                |
| 10023 | Dihydrocodeine Tartrate/Paracetamol    |
| 10077 | Buprenorphine hydrochloride            |
| 10122 | Dihydrocodeine Tartrate/Paracetamol    |
| 10176 | Codeine phosphate/Paracetamol          |
| 10178 | Paracetamol/Codeine phosphate/Caffeine |
| 10205 | Buprenorphine                          |
| 10226 | Paracetamol/Codeine phosphate/Caffeine |
| 10239 | Morphine sulfate                       |
| 10309 | Dihydrocodeine tartrate                |
| 10509 | Pentazocine Hydrochloride/Paracetamol  |
| 10582 | Codeine Phosphate/Paracetamol          |
| 10583 | Pentazocine Lactate                    |
| 10602 | Codeine phosphate/Paracetamol          |
| 10631 | Morphine Anhydrous                     |
| 10730 | Morphine sulfate                       |
| 10769 | Pentazocine hydrochloride              |
| 10922 | Fentanyl                               |
| 10925 | Meptazinol hydrochloride               |
| 11009 | Codeine Phosphate/Caffeine/Paracetamol |
| 11101 | Tramadol hydrochloride                 |
| 11129 | Papaveretum                            |
| 11250 | Paracetamol/Codeine phosphate          |
| 11275 | Tramadol hydrochloride                 |
| 11325 | Codeine Phosphate/Paracetamol          |
| 11342 | Morphine sulfate                       |
| 11405 | Oxycodone hydrochloride                |
| 11471 | Tramadol hydrochloride                 |
| 11549 | Tramadol hydrochloride                 |
| 11554 | Ibuprofen/Codeine phosphate            |
| 11584 | Buprenorphine                          |
| 11665 | Codeine phosphate/Paracetamol          |
| 11698 | Morphine Sulphate                      |
| 11734 | Tramadol hydrochloride                 |

---

---

|       |                                                                   |
|-------|-------------------------------------------------------------------|
| 11746 | Tramadol hydrochloride                                            |
| 11748 | Tramadol hydrochloride                                            |
| 11801 | Meptazinol hydrochloride                                          |
| 11807 | Codeine Phosphate/Paracetamol                                     |
| 11838 | Morphine sulfate                                                  |
| 11843 | Fentanyl citrate                                                  |
| 11971 | Cocaine hydrochloride/Morphine hydrochloride/Ethanol<br>90%/Syrup |
| 11982 | Fentanyl                                                          |
| 12020 | Cyclizine hydrochloride/Dipipanone hydrochloride                  |
| 12076 | Dextropropoxyphene Napsylate                                      |
| 12219 | Morphine sulfate                                                  |
| 12591 | Morphine sulfate                                                  |
| 12602 | Morphine sulfate                                                  |
| 12604 | Morphine sulfate                                                  |
| 12709 | Codeine Phosphate/Ibuprofen                                       |
| 12889 | Morphine sulfate                                                  |
| 12900 | Morphine sulfate                                                  |
| 13031 | Buprenorphine hydrochloride                                       |
| 13076 | Fentanyl citrate                                                  |
| 13114 | Morphine sulfate                                                  |
| 13117 | Morphine sulfate                                                  |
| 13172 | Morphine sulfate                                                  |
| 13225 | Morphine sulfate                                                  |
| 13280 | Morphine sulfate                                                  |
| 13300 | Buprenorphine                                                     |
| 13420 | Diamorphine hydrochloride                                         |
| 13711 | Morphine Sulphate                                                 |
| 13813 | Tramadol hydrochloride                                            |
| 13893 | Ibuprofen/Codeine phosphate                                       |
| 13995 | Morphine Sulphate                                                 |
| 13997 | Morphine Sulphate                                                 |
| 14050 | Morphine Sulphate                                                 |
| 14063 | Morphine sulfate                                                  |
| 14086 | Methadone Hydrochloride                                           |
| 14156 | Morphine sulfate                                                  |
| 14226 | Morphine sulfate                                                  |
| 14394 | Phenazocine Hydrobromide                                          |
| 14490 | Tramadol hydrochloride                                            |
| 14676 | Codeine Phosphate/Caffeine/Paracetamol                            |
| 14688 | Dihydrocodeine Tartrate/Paracetamol                               |
| 14785 | Codeine Phosphate/Paracetamol                                     |
| 14900 | Fentanyl                                                          |
| 14912 | Codeine Phosphate/Paracetamol                                     |
| 14964 | Codeine phosphate/Paracetamol/Caffeine                            |
| 15198 | Paracetamol/Dihydrocodeine tartrate                               |

---

---

|       |                                              |
|-------|----------------------------------------------|
| 15337 | Fentanyl citrate                             |
| 15339 | Diamorphine hydrochloride                    |
| 15353 | Papaveretum                                  |
| 15779 | Codeine Phosphate/Aspirin                    |
| 15781 | Morphine Sulphate                            |
| 15792 | Hydromorphone hydrochloride                  |
| 15793 | Diamorphine hydrochloride                    |
| 15798 | Hydromorphone hydrochloride                  |
| 15815 | Morphine sulfate                             |
| 15831 | Codeine Phosphate/Paracetamol                |
| 15950 | Morphine sulfate                             |
| 15964 | Morphine sulfate                             |
| 16039 | Codeine Phosphate/Caffeine/Paracetamol       |
| 16076 | Tramadol Hydrochloride/Paracetamol           |
| 16096 | Codeine phosphate                            |
| 16189 | Morphine Sulphate                            |
| 16271 | Tramadol hydrochloride                       |
| 16273 | Morphine sulfate                             |
| 16335 | Cyclizine tartrate/Morphine tartrate         |
| 16395 | Tramadol hydrochloride                       |
| 16467 | Codeine Phosphate/Paracetamol                |
| 16592 | Codeine Phosphate/Caffeine/Paracetamol       |
| 16618 | Fentanyl                                     |
| 16818 | Codeine Phosphate/Paracetamol                |
| 16964 | Nalbuphine Hydrochloride                     |
| 17043 | Pethidine hydrochloride                      |
| 17158 | Codeine phosphate/Paracetamol                |
| 17167 | Phenazocine Hydrobromide                     |
| 17386 | Pethidine hydrochloride                      |
| 17398 | Morphine tartrate/Cyclizine tartrate         |
| 17490 | Cyclizine Tartrate/Morphine Tartrate         |
| 17563 | Codeine phosphate/Paracetamol                |
| 17671 | Methadone hydrochloride                      |
| 17734 | Dextromoramide Tartrate                      |
| 17893 | Morphine sulfate                             |
| 17896 | Methadone Hydrochloride                      |
| 17917 | Dihydrocodeine Tartrate/Paracetamol          |
| 17926 | Codeine Phosphate/Aspirin                    |
| 17936 | Morphine sulfate                             |
| 17943 | Morphine sulfate                             |
| 18166 | Morphine Sulphate                            |
| 18174 | Fentanyl citrate                             |
| 18221 | Codeine Phosphate/Paracetamol                |
| 18261 | Aspirin/Papaveretum                          |
| 18468 | Peppermint oil/Morphine anhydrous            |
| 18482 | Dextropropoxyphene Hydrochloride/Paracetamol |

---

---

|       |                                                                   |
|-------|-------------------------------------------------------------------|
| 18491 | Pethidine hydrochloride/Promethazine hydrochloride                |
| 18656 | Morphine sulfate                                                  |
| 18700 | Morphine sulfate                                                  |
| 18734 | Morphine sulfate                                                  |
| 18792 | Diamorphine hydrochloride                                         |
| 18801 | Morphine sulfate                                                  |
| 18881 | Morphine sulfate                                                  |
| 19092 | Morphine Sulphate                                                 |
| 19116 | Pethidine hydrochloride/Promethazine hydrochloride                |
| 19119 | Nalbuphine Hydrochloride                                          |
| 19206 | Paracetamol/Dihydrocodeine tartrate                               |
| 19291 | Morphine sulfate                                                  |
| 19317 | Codeine Phosphate/Papaverine Hydrochloride/Morphine Hydrochloride |
| 19449 | Morphine sulfate                                                  |
| 19471 | Morphine sulfate                                                  |
| 19477 | Morphine sulfate                                                  |
| 19764 | Codeine Phosphate/Papaverine Hydrochloride/Morphine Hydrochloride |
| 19954 | Hydromorphone hydrochloride                                       |
| 19972 | Hydromorphone hydrochloride                                       |
| 19993 | Tramadol hydrochloride                                            |
| 20005 | Morphine sulfate                                                  |
| 20039 | Levorphanol Tartrate                                              |
| 20127 | Codeine Phosphate/Aspirin                                         |
| 20310 | Tramadol hydrochloride                                            |
| 20565 | Codeine Phosphate/Caffeine/Paracetamol                            |
| 20783 | Morphine sulfate                                                  |
| 20815 | Morphine sulfate                                                  |
| 21113 | Dihydrocodeine Tartrate/Paracetamol                               |
| 21251 | Paracetamol/Codeine phosphate/Caffeine                            |
| 21275 | Hydromorphone hydrochloride                                       |
| 21285 | Hydromorphone hydrochloride                                       |
| 21397 | Tramadol hydrochloride                                            |
| 21562 | Methadone hydrochloride                                           |
| 21673 | Codeine Phosphate/Caffeine/Paracetamol                            |
| 21703 | Codeine Phosphate/Paracetamol                                     |
| 21777 | Tramadol hydrochloride                                            |
| 21797 | Tramadol hydrochloride                                            |
| 21868 | Cocaine/Diamorphine Hydrochloride                                 |
| 21880 | Codeine phosphate/Paracetamol                                     |
| 21947 | Tramadol hydrochloride                                            |
| 22024 | Morphine sulfate                                                  |
| 22026 | Morphine sulfate                                                  |
| 22066 | Fentanyl                                                          |
| 22571 | Morphine Sulphate/Atropine Sulphate                               |

---

---

|       |                                                                             |
|-------|-----------------------------------------------------------------------------|
| 22690 | Morphine Sulphate                                                           |
| 22756 | Morphine sulfate                                                            |
| 22764 | Paracetamol/Codeine phosphate                                               |
| 23060 | Morphine sulfate                                                            |
| 23063 | Peppermint oil/Morphine anhydrous                                           |
| 23375 | Dextromoramide Tartrate                                                     |
| 23420 | Codeine Phosphate/Paracetamol                                               |
| 23442 | Pethidine hydrochloride                                                     |
| 23625 | Tramadol hydrochloride                                                      |
| 23906 | Alfentanil hydrochloride                                                    |
| 23952 | Codeine phosphate/Paracetamol                                               |
| 23981 | Tramadol hydrochloride                                                      |
| 24108 | Diamorphine Hydrochloride                                                   |
| 24125 | Codeine phosphate                                                           |
| 24440 | Methadone hydrochloride                                                     |
| 24453 | Morphine Sulphate                                                           |
| 24584 | Methadone hydrochloride                                                     |
| 24640 | Diamorphine Hydrochloride                                                   |
| 24736 | Hydromorphone hydrochloride                                                 |
| 24790 | Alfentanil Hydrochloride                                                    |
| 24828 | Codeine Phosphate/Caffeine Citrate/Citric Acid/Calcium<br>Carbonate/Aspirin |
| 24830 | Morphine Sulphate                                                           |
| 24867 | Pethidine Hydrochloride/levallorphan                                        |
| 24986 | Fentanyl citrate                                                            |
| 25109 | Paracetamol/Codeine phosphate/Caffeine                                      |
| 25185 | Fentanyl Citrate                                                            |
| 25199 | Fentanyl citrate                                                            |
| 25316 | Cyclizine Tartrate/Morphine Tartrate                                        |
| 25481 | Morphine Anhydrous                                                          |
| 25514 | Codeine Phosphate/Paracetamol                                               |
| 25529 | Codeine Phosphate/Caffeine/Paracetamol                                      |
| 25611 | Dextromoramide Tartrate                                                     |
| 25979 | Dextropropoxyphene napsylate                                                |
| 26021 | Fentanyl citrate                                                            |
| 26115 | Papaveretum/Hyoscine hydrobromide                                           |
| 26277 | Methadone hydrochloride                                                     |
| 26283 | Morphine sulfate                                                            |
| 26284 | Morphine sulfate                                                            |
| 26336 | Tramadol hydrochloride                                                      |
| 26908 | Fentanyl citrate                                                            |
| 26986 | Tramadol hydrochloride                                                      |
| 27058 | Morphine sulfate                                                            |
| 27591 | Tramadol hydrochloride                                                      |
| 27749 | Morphine Sulphate                                                           |
| 27784 | Paracetamol/Codeine phosphate                                               |

---



---

|       |                                              |
|-------|----------------------------------------------|
| 27785 | Codeine phosphate/Paracetamol                |
| 28189 | Fentanyl                                     |
| 28253 | Dextropropoxyphene Hydrochloride/Paracetamol |
| 28328 | Methadone hydrochloride                      |
| 28421 | Morphine Sulphate                            |
| 28567 | Alfentanil Hydrochloride                     |
| 28598 | Dihydrocodeine Tartrate/Paracetamol          |
| 28711 | Diamorphine Hydrochloride                    |
| 28728 | Tramadol hydrochloride                       |
| 28732 | Hyoscine Hydrobromide/Papaveretum            |
| 28780 | Paracetamol/Dihydrocodeine tartrate          |
| 28784 | Codeine Phosphate/Aspirin                    |
| 28805 | Dextromoramide Tartrate                      |
| 29014 | Diamorphine Hydrochloride                    |
| 29020 | Morphine sulfate                             |
| 29304 | Methadone hydrochloride                      |
| 29342 | Paracetamol/Codeine phosphate                |
| 29373 | Codeine Phosphate/Caffeine/Paracetamol       |
| 29426 | Pethidine Hydrochloride                      |
| 29488 | Codeine phosphate/Paracetamol                |
| 29500 | Diamorphine hydrochloride                    |
| 29577 | Fentanyl citrate                             |
| 29860 | Tramadol hydrochloride                       |
| 29898 | Morphine sulfate                             |
| 30049 | Morphine Sulphate                            |
| 30123 | Codeine phosphate/Paracetamol                |
| 30165 | Dihydrocodeine Tartrate/Paracetamol          |
| 30252 | Morphine Anhydrous                           |
| 30295 | Dihydrocodeine Tartrate/Paracetamol          |
| 30514 | Diamorphine Hydrochloride                    |
| 30531 | Methadone hydrochloride                      |
| 30633 | Levorphanol Tartrate                         |
| 30698 | Diamorphine Hydrochloride                    |
| 30761 | Diamorphine hydrochloride                    |
| 30966 | Paracetamol/Dextropropoxyphene hydrochloride |
| 31033 | Diamorphine Hydrochloride                    |
| 31053 | Fentanyl                                     |
| 31105 | Tramadol hydrochloride                       |
| 31107 | Tramadol hydrochloride                       |
| 31155 | Paracetamol/Codeine phosphate                |
| 31253 | Pethidine Hydrochloride                      |
| 31452 | Codeine phosphate                            |
| 31577 | Codeine phosphate/Paracetamol                |
| 31582 | Pentazocine lactate                          |
| 31584 | Pentazocine lactate                          |
| 31650 | Morphine sulfate                             |

---

---

|       |                                                    |
|-------|----------------------------------------------------|
| 31700 | Codeine phosphate                                  |
| 31734 | Tramadol hydrochloride                             |
| 31871 | Codeine Phosphate/Paracetamol                      |
| 31885 | Pethidine hydrochloride                            |
| 31935 | Pethidine hydrochloride                            |
| 31943 | Codeine phosphate                                  |
| 31960 | Diamorphine hydrochloride                          |
| 32165 | Tramadol hydrochloride                             |
| 32237 | Methadone hydrochloride                            |
| 32381 | Alfentanil hydrochloride                           |
| 32425 | Oxycodone hydrochloride                            |
| 32450 | Tramadol hydrochloride                             |
| 32688 | Diamorphine Hydrochloride                          |
| 32692 | Codeine phosphate/Paracetamol                      |
| 32831 | Pethidine Hydrochloride                            |
| 32897 | Diamorphine hydrochloride                          |
| 32926 | Paracetamol/Dihydrocodeine tartrate                |
| 33068 | Methadone hydrochloride                            |
| 33340 | Paracetamol/Dihydrocodeine tartrate                |
| 33643 | Paracetamol/Codeine phosphate                      |
| 33654 | Dihydrocodeine tartrate                            |
| 33679 | Paracetamol/Codeine phosphate                      |
| 33743 | Dihydrocodeine Tartrate/Paracetamol                |
| 33832 | Methadone hydrochloride                            |
| 33954 | Pethidine Hydrochloride/Promethazine Hydrochloride |
| 33995 | Paracetamol/Dextropropoxyphene hydrochloride       |
| 34008 | Dihydrocodeine tartrate                            |
| 34065 | Tramadol Hydrochloride                             |
| 34073 | Ethylmorphine hydrochloride                        |
| 34090 | Codeine phosphate                                  |
| 34152 | Codeine phosphate                                  |
| 34172 | Codeine phosphate                                  |
| 34176 | Codeine phosphate                                  |
| 34229 | Codeine phosphate/Paracetamol                      |
| 34260 | Tramadol hydrochloride                             |
| 34281 | Tramadol Hydrochloride                             |
| 34348 | Codeine phosphate                                  |
| 34373 | Codeine phosphate                                  |
| 34383 | Codeine phosphate                                  |
| 34397 | Paracetamol/Dextropropoxyphene hydrochloride       |
| 34422 | Tramadol hydrochloride                             |
| 34437 | Codeine phosphate                                  |
| 34440 | Dihydrocodeine tartrate                            |
| 34444 | Codeine phosphate                                  |
| 34477 | Morphine sulfite                                   |
| 34489 | Diamorphine Hydrochloride                          |

---

---

|       |                                              |
|-------|----------------------------------------------|
| 34497 | Paracetamol/Codeine phosphate                |
| 34518 | Paracetamol/Codeine phosphate                |
| 34521 | Tramadol hydrochloride                       |
| 34546 | Paracetamol/Dextropropoxyphene hydrochloride |
| 34552 | Codeine phosphate                            |
| 34554 | Paracetamol/Dextropropoxyphene hydrochloride |
| 34570 | Tramadol hydrochloride                       |
| 34579 | Dihydrocodeine tartrate                      |
| 34639 | Tramadol hydrochloride                       |
| 34662 | Dihydrocodeine tartrate                      |
| 34667 | Codeine phosphate/Paracetamol                |
| 34730 | Dihydrocodeine tartrate                      |
| 34737 | Paracetamol/Dihydrocodeine tartrate          |
| 34771 | Morphine Sulphate                            |
| 34786 | Diamorphine hydrochloride                    |
| 34787 | Diamorphine hydrochloride                    |
| 34789 | Codeine phosphate                            |
| 34808 | Tramadol hydrochloride                       |
| 34815 | Paracetamol/Codeine phosphate                |
| 34840 | Codeine phosphate/Paracetamol                |
| 34845 | Codeine phosphate/Paracetamol                |
| 34865 | Paracetamol/Codeine phosphate                |
| 34920 | Paracetamol/Dihydrocodeine tartrate          |
| 34939 | Paracetamol/Dihydrocodeine tartrate          |
| 34968 | Paracetamol/Codeine phosphate                |
| 35038 | Oxycodone hydrochloride                      |
| 35085 | Oxycodone hydrochloride                      |
| 35093 | Morphine sulfate                             |
| 35269 | Buprenorphine hydrochloride                  |
| 35330 | Fentanyl citrate                             |
| 35341 | Oxycodone hydrochloride                      |
| 35347 | Tramadol Hydrochloride                       |
| 35438 | Tramadol hydrochloride                       |
| 35500 | Alfentanil hydrochloride                     |
| 35506 | Methadone hydrochloride                      |
| 35651 | Tramadol hydrochloride                       |
| 35656 | Tramadol hydrochloride                       |
| 35792 | Codeine phosphate                            |
| 35806 | Tramadol hydrochloride                       |
| 35853 | Fentanyl citrate                             |
| 35968 | Fentanyl                                     |
| 36019 | Paracetamol/Dihydrocodeine tartrate          |
| 36035 | Tramadol hydrochloride                       |
| 36040 | Fentanyl                                     |
| 36185 | Alfentanil hydrochloride                     |
| 36211 | Fentanyl                                     |

---

---

|       |                                                    |
|-------|----------------------------------------------------|
| 36436 | Methadone hydrochloride                            |
| 36472 | Pentazocine Hydrochloride/Paracetamol              |
| 36608 | Codeine phosphate/Paracetamol                      |
| 36697 | Tramadol hydrochloride                             |
| 36732 | Tramadol hydrochloride                             |
| 36873 | Tramadol hydrochloride                             |
| 36949 | Tramadol hydrochloride                             |
| 36993 | Codeine phosphate/Paracetamol                      |
| 37020 | Tramadol hydrochloride                             |
| 37021 | Tramadol hydrochloride                             |
| 37251 | Alfentanil hydrochloride                           |
| 37507 | Methadone hydrochloride                            |
| 37518 | Methadone hydrochloride                            |
| 37703 | Pethidine hydrochloride                            |
| 37719 | Fentanyl                                           |
| 37779 | Fentanyl                                           |
| 37831 | Tramadol hydrochloride                             |
| 37867 | Tramadol Hydrochloride                             |
| 37904 | Codeine phosphate/Paracetamol                      |
| 37923 | Fentanyl                                           |
| 37928 | Fentanyl                                           |
| 37954 | Fentanyl                                           |
| 37960 | Fentanyl                                           |
| 37968 | Fentanyl                                           |
| 38013 | Pethidine hydrochloride                            |
| 38031 | Fentanyl                                           |
| 38085 | Codeine Phosphate/Paracetamol                      |
| 38088 | Codeine Phosphate/Paracetamol                      |
| 38092 | Pentazocine Lactate                                |
| 38103 | Pethidine Hydrochloride                            |
| 38183 | Remifentanyl hydrochloride                         |
| 38196 | Tramadol hydrochloride                             |
| 38301 | Dipipanone Hydrochloride/Cyclizine Hydrochloride   |
| 38311 | Buprenorphine Hydrochloride/Naloxone Hydrochloride |
| 38326 | Fentanyl                                           |
| 38351 | Fentanyl                                           |
| 38363 | Codeine Phosphate/Paracetamol                      |
| 38365 | Fentanyl                                           |
| 38430 | Paracetamol/Dihydrocodeine tartrate                |
| 38521 | Dihydrocodeine tartrate                            |
| 38524 | Alfentanil hydrochloride                           |
| 38528 | Tramadol hydrochloride                             |
| 38553 | Fentanyl                                           |
| 38874 | Tramadol hydrochloride                             |
| 38950 | Dihydrocodeine tartrate/Paracetamol                |
| 38956 | Tramadol hydrochloride                             |

---

---

|       |                                                |
|-------|------------------------------------------------|
| 38970 | Dihydrocodeine tartrate                        |
| 39084 | Fentanyl                                       |
| 39180 | Fentanyl                                       |
| 39251 | Fentanyl                                       |
| 39340 | Paracetamol/Codeine phosphate                  |
| 39419 | Dextromoramide tartrate                        |
| 39437 | Methadone hydrochloride                        |
| 39461 | Ibuprofen/Codeine phosphate                    |
| 39469 | Fentanyl citrate                               |
| 39475 | Oxycodone hydrochloride/Naloxone hydrochloride |
| 39477 | Oxycodone hydrochloride/Naloxone hydrochloride |
| 39478 | Naloxone hydrochloride/Oxycodone hydrochloride |
| 39498 | Naloxone hydrochloride/Oxycodone hydrochloride |
| 39505 | Tramadol hydrochloride                         |
| 39518 | Fentanyl citrate                               |
| 39558 | Dihydrocodeine tartrate                        |
| 39590 | Fentanyl citrate                               |
| 39709 | Tramadol hydrochloride                         |
| 39723 | Fentanyl citrate                               |
| 39746 | Fentanyl citrate                               |
| 39750 | Tramadol hydrochloride                         |
| 39756 | Fentanyl citrate                               |
| 39798 | Tramadol hydrochloride                         |
| 39799 | Fentanyl citrate                               |
| 39811 | Tramadol hydrochloride                         |
| 39842 | Meptazinol hydrochloride                       |
| 39929 | Fentanyl citrate                               |
| 39987 | Fentanyl citrate                               |
| 40018 | Fentanyl citrate                               |
| 40058 | Tramadol hydrochloride                         |
| 40060 | Tramadol hydrochloride                         |
| 40061 | Tramadol hydrochloride                         |
| 40098 | Fentanyl citrate                               |
| 40128 | Fentanyl citrate                               |
| 40159 | Dihydrocodeine tartrate                        |
| 40166 | Tramadol hydrochloride                         |
| 40211 | Buprenorphine hydrochloride                    |
| 40212 | Buprenorphine hydrochloride                    |
| 40239 | Pethidine hydrochloride                        |
| 40249 | Tramadol hydrochloride                         |
| 40254 | Tramadol hydrochloride                         |
| 40385 | Codeine phosphate/Paracetamol                  |
| 40422 | Paracetamol/Dihydrocodeine tartrate            |
| 40427 | Alfentanil Hydrochloride                       |
| 40434 | Fentanyl citrate                               |
| 40473 | Buprenorphine hydrochloride                    |

---

---

|       |                                                    |
|-------|----------------------------------------------------|
| 40508 | Fentanyl citrate                                   |
| 40563 | Morphine sulfate                                   |
| 40576 | Fentanyl citrate                                   |
| 40616 | Oxycodone hydrochloride/Naloxone hydrochloride     |
| 40645 | Oxycodone hydrochloride/Naloxone hydrochloride     |
| 40662 | Codeine phosphate/Paracetamol                      |
| 40663 | Codeine phosphate/Paracetamol                      |
| 40688 | Oxycodone hydrochloride                            |
| 40718 | Tramadol hydrochloride                             |
| 40752 | Oxycodone hydrochloride                            |
| 40785 | Naloxone hydrochloride/Oxycodone hydrochloride     |
| 40805 | Tramadol hydrochloride                             |
| 40883 | Tramadol hydrochloride                             |
| 40926 | Tramadol hydrochloride                             |
| 40940 | Fentanyl citrate                                   |
| 40957 | Fentanyl citrate                                   |
| 40961 | Naloxone hydrochloride/Oxycodone hydrochloride     |
| 41135 | Fentanyl citrate                                   |
| 41161 | Fentanyl                                           |
| 41214 | Codeine phosphate                                  |
| 41259 | Codeine phosphate/Paracetamol                      |
| 41275 | Paracetamol/Codeine phosphate                      |
| 41276 | Paracetamol/Codeine phosphate                      |
| 41286 | Fentanyl citrate                                   |
| 41348 | Fentanyl citrate                                   |
| 41416 | Codeine phosphate                                  |
| 41523 | Codeine phosphate                                  |
| 41535 | Codeine phosphate                                  |
| 41550 | Pethidine Hydrochloride                            |
| 41599 | Codeine phosphate                                  |
| 41608 | Methadone hydrochloride                            |
| 41668 | Morphine hydrochloride                             |
| 41673 | Morphine sulfate                                   |
| 41674 | Morphine sulfate                                   |
| 41682 | Codeine phosphate/Paracetamol                      |
| 41720 | Methadone hydrochloride                            |
| 41722 | Diamorphine hydrochloride                          |
| 41974 | Morphine sulfate                                   |
| 41976 | Tramadol hydrochloride                             |
| 42021 | Fentanyl                                           |
| 42074 | Buprenorphine Hydrochloride/Naloxone Hydrochloride |
| 42094 | Pentazocine lactate                                |
| 42208 | Dihydrocodeine tartrate                            |
| 42280 | Paracetamol/Tramadol hydrochloride                 |
| 42332 | Paracetamol/Tramadol hydrochloride                 |
| 42380 | Morphine Sulphate                                  |

---

---

|       |                                              |
|-------|----------------------------------------------|
| 42399 | Fentanyl citrate                             |
| 42538 | Fentanyl citrate                             |
| 42576 | Fentanyl                                     |
| 42590 | Fentanyl                                     |
| 42591 | Fentanyl                                     |
| 42708 | Pethidine Hydrochloride                      |
| 42792 | Codeine phosphate                            |
| 42798 | Tramadol hydrochloride                       |
| 42913 | Diamorphine hydrochloride                    |
| 43089 | Fentanyl citrate                             |
| 43152 | Fentanyl                                     |
| 43198 | Tramadol hydrochloride                       |
| 43244 | Codeine phosphate/Paracetamol                |
| 43260 | Methadone Hydrochloride                      |
| 43315 | Morphine sulfate                             |
| 43384 | Alfentanil hydrochloride                     |
| 43414 | Codeine phosphate/Paracetamol                |
| 43441 | Paracetamol/Dihydrocodeine tartrate          |
| 43504 | Codeine phosphate                            |
| 43513 | Tramadol hydrochloride                       |
| 43536 | Paracetamol/Dextropropoxyphene hydrochloride |
| 43550 | Codeine phosphate                            |
| 43617 | Fentanyl citrate                             |
| 43652 | Morphine sulfate                             |
| 43657 | Morphine sulfate                             |
| 43720 | Alfentanil hydrochloride                     |
| 43812 | Fentanyl citrate                             |
| 44159 | Caffeine/Codeine phosphate/Paracetamol       |
| 44210 | Codeine phosphate/Paracetamol                |
| 44371 | Tramadol hydrochloride                       |
| 44487 | Fentanyl                                     |
| 44837 | Fentanyl                                     |
| 44867 | Pentazocine lactate                          |
| 44924 | Codeine phosphate/Paracetamol                |
| 45092 | Fentanyl citrate                             |
| 45231 | Paracetamol/Dextropropoxyphene hydrochloride |
| 45276 | Paracetamol/Dextropropoxyphene hydrochloride |
| 45325 | Pethidine Hydrochloride                      |
| 45439 | Fentanyl citrate                             |
| 45460 | Fentanyl                                     |
| 45549 | Fentanyl                                     |
| 45598 | Fentanyl citrate                             |
| 45736 | Morphine sulfate                             |
| 45745 | Oxycodone hydrochloride                      |
| 45766 | Oxycodone hydrochloride                      |
| 45788 | Oxycodone hydrochloride                      |

---

---

|       |                                        |
|-------|----------------------------------------|
| 45790 | Oxycodone hydrochloride                |
| 45800 | Tapentadol hydrochloride               |
| 45811 | Tapentadol hydrochloride               |
| 45827 | Oxycodone hydrochloride                |
| 45830 | Oxycodone hydrochloride                |
| 45894 | Fentanyl citrate                       |
| 45929 | Oxycodone hydrochloride                |
| 45936 | Tapentadol hydrochloride               |
| 45982 | Tapentadol hydrochloride               |
| 46018 | Tapentadol hydrochloride               |
| 46019 | Tapentadol hydrochloride               |
| 46020 | Tapentadol hydrochloride               |
| 46021 | Tapentadol hydrochloride               |
| 46022 | Tapentadol hydrochloride               |
| 46159 | Tapentadol hydrochloride               |
| 46187 | Oxycodone hydrochloride                |
| 46279 | Tramadol hydrochloride                 |
| 46354 | Fentanyl citrate                       |
| 46461 | Tapentadol hydrochloride               |
| 46511 | Codeine phosphate/Paracetamol          |
| 46555 | Fentanyl citrate                       |
| 46559 | Fentanyl                               |
| 46560 | Fentanyl                               |
| 46578 | Methadone hydrochloride                |
| 46587 | Tramadol hydrochloride                 |
| 46633 | Codeine phosphate/Paracetamol          |
| 46643 | Tramadol hydrochloride                 |
| 46657 | Fentanyl                               |
| 46658 | Fentanyl                               |
| 46659 | Tapentadol hydrochloride               |
| 46729 | Paracetamol/Codeine phosphate          |
| 46733 | Fentanyl                               |
| 46898 | Paracetamol/Codeine phosphate          |
| 46906 | Codeine phosphate/Paracetamol          |
| 46987 | Codeine phosphate/Paracetamol          |
| 47003 | Codeine phosphate                      |
| 47071 | Dihydrocodeine Tartrate/Paracetamol    |
| 47072 | Papaveretum                            |
| 47081 | Codeine Phosphate/Caffeine/Paracetamol |
| 47154 | Morphine sulfate                       |
| 47399 | Tapentadol hydrochloride               |
| 47413 | Fentanyl                               |
| 47460 | Tapentadol hydrochloride               |
| 47508 | Codeine phosphate/Paracetamol          |
| 47555 | Morphine sulfate                       |
| 47671 | Diamorphine Hydrochloride              |

---



---

|       |                               |
|-------|-------------------------------|
| 47672 | Diamorphine Hydrochloride     |
| 47706 | Methadone hydrochloride       |
| 47753 | Morphine sulfate              |
| 47759 | Fentanyl citrate              |
| 47847 | Codeine phosphate/Paracetamol |
| 47854 | Tramadol Hydrochloride        |
| 47867 | Morphine sulfate              |
| 47919 | Codeine phosphate             |
| 47949 | Morphine sulfate              |
| 47952 | Codeine phosphate             |
| 47985 | Morphine sulfate              |
| 48004 | Codeine phosphate             |
| 48090 | Tramadol hydrochloride        |
| 48128 | Pethidine hydrochloride       |
| 48133 | Dihydrocodeine tartrate       |
| 48148 | Pethidine hydrochloride       |
| 48153 | Codeine phosphate             |
| 48158 | Diamorphine hydrochloride     |
| 48183 | Fentanyl citrate              |
| 48259 | Diamorphine hydrochloride     |
| 48311 | Codeine phosphate/Paracetamol |
| 48413 | Diamorphine hydrochloride     |
| 48434 | Diamorphine hydrochloride     |
| 48483 | Diamorphine hydrochloride     |
| 48571 | Fentanyl                      |
| 48604 | Morphine sulfate              |
| 48775 | Codeine phosphate/Paracetamol |
| 48880 | Diamorphine hydrochloride     |
| 48912 | Diamorphine hydrochloride     |
| 48913 | Diamorphine hydrochloride     |
| 48953 | Diamorphine hydrochloride     |
| 49323 | Tramadol hydrochloride        |
| 49324 | Tramadol hydrochloride        |
| 49742 | Oxycodone hydrochloride       |
| 49787 | Oxycodone hydrochloride       |
| 49791 | Oxycodone hydrochloride       |
| 49940 | Oxycodone hydrochloride       |
| 49976 | Morphine sulfate              |
| 50095 | Oxycodone hydrochloride       |
| 50380 | Buprenorphine hydrochloride   |
| 50421 | Codeine phosphate             |
| 50468 | Codeine phosphate             |
| 50513 | Morphine sulfate              |
| 50532 | Dihydrocodeine tartrate       |
| 50659 | Codeine phosphate             |
| 50671 | Fentanyl                      |

---

---

|       |                                        |
|-------|----------------------------------------|
| 50726 | Oxycodone hydrochloride                |
| 50733 | Oxycodone hydrochloride                |
| 50862 | Tramadol hydrochloride                 |
| 50929 | Fentanyl                               |
| 50947 | Tramadol hydrochloride                 |
| 51084 | Codeine phosphate/Paracetamol          |
| 51235 | Fentanyl                               |
| 51327 | Codeine phosphate                      |
| 51381 | Paracetamol/Codeine phosphate/Caffeine |
| 51384 | Oxycodone hydrochloride                |
| 51611 | Oxycodone hydrochloride                |
| 51644 | Codeine phosphate                      |
| 51789 | Oxycodone hydrochloride                |
| 51819 | Codeine phosphate/Paracetamol          |
| 51896 | Oxycodone hydrochloride                |
| 51937 | Codeine phosphate                      |
| 52085 | Codeine phosphate/Paracetamol          |
| 52178 | Fentanyl citrate                       |
| 52216 | Oxycodone hydrochloride                |
| 52217 | Oxycodone hydrochloride                |
| 52220 | Oxycodone hydrochloride                |
| 52400 | Pethidine hydrochloride                |
| 52495 | Tramadol hydrochloride                 |
| 52592 | Oxycodone hydrochloride                |
| 52605 | Tramadol hydrochloride                 |
| 52809 | Oxycodone hydrochloride                |
| 52888 | Codeine phosphate                      |
| 52889 | Codeine phosphate                      |
| 52929 | Codeine phosphate                      |
| 52966 | Paracetamol/Codeine phosphate/Caffeine |
| 52977 | Tramadol hydrochloride                 |
| 53062 | Hydromorphone hydrochloride            |
| 53079 | Paracetamol/Dihydrocodeine tartrate    |
| 53106 | Morphine sulfate                       |
| 53113 | Oxycodone hydrochloride                |
| 53116 | Oxycodone hydrochloride                |
| 53181 | Diamorphine hydrochloride              |
| 53273 | Morphine hydrochloride                 |
| 53287 | Codeine phosphate/Paracetamol          |
| 53417 | Diamorphine hydrochloride              |
| 53600 | Codeine phosphate                      |
| 53617 | Ibuprofen/Codeine phosphate            |
| 53639 | Morphine sulfate                       |
| 53679 | Codeine phosphate/Paracetamol          |
| 53702 | Codeine phosphate/Paracetamol          |
| 53709 | Pethidine Hydrochloride                |

---

---

|       |                                        |
|-------|----------------------------------------|
| 53918 | Morphine sulfate                       |
| 53929 | Pethidine hydrochloride                |
| 53999 | Codeine phosphate                      |
| 54017 | Morphine Sulphate                      |
| 54023 | Tramadol hydrochloride                 |
| 54085 | Pethidine Hydrochloride                |
| 54354 | Dihydrocodeine tartrate                |
| 54406 | Morphine sulfate                       |
| 54520 | Morphine Sulphate                      |
| 54694 | Oxycodone hydrochloride                |
| 54713 | Paracetamol/Dihydrocodeine tartrate    |
| 54790 | Pethidine hydrochloride                |
| 54806 | Buprenorphine                          |
| 54979 | Fentanyl                               |
| 55044 | Codeine phosphate/Paracetamol          |
| 55221 | Diamorphine hydrochloride              |
| 55309 | Codeine phosphate                      |
| 55365 | Morphine sulfate                       |
| 55425 | Dihydrocodeine Tartrate                |
| 55465 | Codeine phosphate/Paracetamol          |
| 55530 | Paracetamol/Dihydrocodeine tartrate    |
| 55724 | Diamorphine hydrochloride              |
| 55752 | Fentanyl                               |
| 55825 | Methadone hydrochloride                |
| 55832 | Morphine sulfate                       |
| 55839 | Pethidine Hydrochloride                |
| 55852 | Pethidine Hydrochloride                |
| 56006 | Paracetamol/Codeine phosphate          |
| 56022 | Pethidine hydrochloride                |
| 56171 | Codeine phosphate/Paracetamol          |
| 56178 | Codeine phosphate                      |
| 56202 | Morphine Sulphate                      |
| 56205 | Paracetamol/Codeine phosphate/Caffeine |
| 56266 | Codeine phosphate/Paracetamol          |
| 56329 | Morphine sulfate                       |
| 56340 | Codeine phosphate/Paracetamol          |
| 56461 | Codeine phosphate/Paracetamol          |
| 56491 | Tramadol hydrochloride                 |
| 56544 | Morphine sulfate                       |
| 56549 | Codeine phosphate/Paracetamol          |
| 56559 | Codeine phosphate                      |
| 56565 | Codeine phosphate/Paracetamol          |
| 56581 | Alfentanil Hydrochloride               |
| 56665 | Oxycodone hydrochloride                |
| 56670 | Fentanyl                               |
| 56671 | Buprenorphine                          |

---

---

|       |                                     |
|-------|-------------------------------------|
| 56788 | Morphine sulfate                    |
| 56817 | Codeine phosphate                   |
| 57027 | Pethidine hydrochloride             |
| 57033 | Oxycodone hydrochloride             |
| 57052 | Oxycodone hydrochloride             |
| 57097 | Codeine phosphate/Paracetamol       |
| 57197 | Paracetamol/Dihydrocodeine tartrate |
| 57353 | Codeine phosphate/Paracetamol       |
| 57381 | Codeine phosphate                   |
| 57454 | Buprenorphine hydrochloride         |
| 57465 | Paracetamol/Codeine phosphate       |
| 57487 | Codeine phosphate                   |
| 57623 | Morphine sulfate                    |
| 57750 | Morphine sulfate                    |
| 57752 | Codeine phosphate                   |
| 57839 | Codeine phosphate/Paracetamol       |
| 57865 | Codeine phosphate/Paracetamol       |
| 57900 | Codeine phosphate/Paracetamol       |
| 57929 | Codeine phosphate/Paracetamol       |
| 58039 | Oxycodone hydrochloride             |
| 58114 | Oxycodone hydrochloride             |
| 58129 | Tramadol hydrochloride              |
| 58190 | Pethidine hydrochloride             |
| 58217 | Oxycodone hydrochloride             |
| 58273 | Buprenorphine hydrochloride         |
| 58279 | Diamorphine hydrochloride           |
| 58288 | Codeine phosphate/Paracetamol       |
| 58290 | Morphine sulfate                    |
| 58316 | Tramadol hydrochloride              |
| 58493 | Oxycodone hydrochloride             |
| 58499 | Diamorphine hydrochloride           |
| 58501 | Codeine phosphate/Paracetamol       |
| 58636 | Codeine phosphate/Paracetamol       |
| 58710 | Morphine sulfate                    |
| 58737 | Pethidine hydrochloride             |
| 58766 | Buprenorphine                       |
| 58836 | Morphine sulfate                    |
| 58848 | Dihydrocodeine tartrate/Paracetamol |
| 58853 | Oxycodone hydrochloride             |
| 58855 | Codeine phosphate/Paracetamol       |
| 58879 | Morphine hydrochloride              |
| 59057 | Fentanyl citrate                    |
| 59131 | Codeine phosphate/Paracetamol       |
| 59146 | Buprenorphine                       |
| 59295 | Methadone hydrochloride             |
| 59392 | Buprenorphine                       |

---

---

|       |                                                       |
|-------|-------------------------------------------------------|
| 59442 | Codeine phosphate/Paracetamol                         |
| 59443 | Fentanyl citrate                                      |
| 59473 | Buprenorphine                                         |
| 59479 | Codeine phosphate/Paracetamol                         |
| 59482 | Fentanyl                                              |
| 59490 | Fentanyl                                              |
| 59584 | Morphine sulfate                                      |
| 59618 | Buprenorphine                                         |
| 59678 | Fentanyl citrate                                      |
| 59705 | Codeine phosphate/Paracetamol                         |
| 59865 | Oxycodone hydrochloride                               |
| 59970 | Buprenorphine hydrochloride                           |
| 59978 | Dihydrocodeine tartrate                               |
| 59986 | Codeine phosphate/Paracetamol                         |
| 59989 | Dihydrocodeine tartrate                               |
| 60040 | Buclizine hydrochloride/Paracetamol/Codeine phosphate |
| 60053 | Buprenorphine hydrochloride                           |
| 60080 | Alfentanil hydrochloride                              |
| 60082 | Morphine sulfate                                      |
| 60121 | Tramadol hydrochloride                                |
| 60146 | Oxycodone hydrochloride                               |
| 60158 | Oxycodone hydrochloride                               |
| 60170 | Buprenorphine                                         |
| 60196 | Oxycodone hydrochloride                               |
| 60296 | Remifentanyl hydrochloride                            |
| 60477 | Fentanyl                                              |
| 60489 | Codeine phosphate                                     |
| 60507 | Morphine sulfate                                      |
| 60517 | Codeine phosphate/Paracetamol                         |
| 60518 | Morphine sulfate                                      |
| 60640 | Codeine phosphate                                     |
| 60721 | Diamorphine hydrochloride                             |
| 60751 | Tramadol hydrochloride                                |
| 60759 | Tapentadol hydrochloride                              |
| 60766 | Fentanyl                                              |
| 60943 | Buprenorphine                                         |
| 60944 | Methadone hydrochloride                               |
| 60950 | Morphine sulfate                                      |
| 60958 | Codeine phosphate                                     |
| 61086 | Fentanyl                                              |
| 61091 | Codeine phosphate                                     |
| 61100 | Buprenorphine hydrochloride                           |
| 61156 | Fentanyl                                              |
| 61241 | Morphine sulfate                                      |
| 61272 | Tramadol hydrochloride                                |
| 61305 | Fentanyl                                              |

---

---

|       |                                     |
|-------|-------------------------------------|
| 61372 | Paracetamol/Dihydrocodeine tartrate |
| 61400 | Morphine sulfate                    |
| 61423 | Morphine sulfate                    |
| 61506 | Morphine sulfate                    |
| 61584 | Morphine sulfate                    |
| 61610 | Tramadol hydrochloride              |
| 61647 | Codeine phosphate/Paracetamol       |
| 61698 | Paracetamol/Dihydrocodeine tartrate |
| 61708 | Fentanyl citrate                    |
| 61744 | Morphine sulfate                    |
| 61764 | Tapentadol hydrochloride            |
| 61775 | Tramadol hydrochloride              |
| 61779 | Oxycodone hydrochloride             |
| 61836 | Oxycodone hydrochloride             |
| 61918 | Morphine sulfate                    |
| 61935 | Oxycodone hydrochloride             |
| 61936 | Oxycodone hydrochloride             |
| 61942 | Morphine sulfate                    |
| 62228 | Codeine phosphate                   |
| 62322 | Oxycodone hydrochloride             |
| 62635 | Paracetamol/Dihydrocodeine tartrate |
| 62675 | Buprenorphine hydrochloride         |
| 62689 | Morphine hydrochloride              |
| 62776 | Buprenorphine hydrochloride         |
| 62778 | Paracetamol/Tramadol hydrochloride  |
| 62874 | Buprenorphine hydrochloride         |
| 62969 | Buprenorphine hydrochloride         |
| 63047 | Tramadol hydrochloride              |
| 63077 | Methadone hydrochloride             |
| 63139 | Fentanyl                            |
| 63182 | Pethidine hydrochloride             |
| 63198 | Oxycodone hydrochloride             |
| 63332 | Oxycodone hydrochloride             |
| 63340 | Fentanyl citrate                    |
| 63398 | Fentanyl citrate                    |
| 63423 | Morphine sulfate                    |
| 63547 | Codeine phosphate                   |
| 63551 | Codeine phosphate/Paracetamol       |
| 63593 | Morphine sulfate                    |
| 63640 | Buprenorphine hydrochloride         |
| 63658 | Codeine Phosphate/Aspirin           |
| 63683 | Codeine phosphate/Aspirin           |
| 63714 | Oxycodone hydrochloride             |
| 63788 | Buprenorphine hydrochloride         |
| 63898 | Tramadol hydrochloride              |
| 63900 | Paracetamol/Codeine phosphate       |

---

---

|       |                                     |
|-------|-------------------------------------|
| 64074 | Paracetamol/Dihydrocodeine tartrate |
| 64079 | Dihydrocodeine tartrate             |
| 64108 | Codeine phosphate                   |
| 64150 | Oxycodone hydrochloride             |
| 64155 | Buprenorphine hydrochloride         |
| 64164 | Oxycodone hydrochloride             |
| 64333 | Oxycodone hydrochloride             |
| 64368 | Dihydrocodeine tartrate/Paracetamol |
| 64387 | Codeine phosphate/Paracetamol       |
| 64417 | Morphine sulfate                    |
| 64426 | Oxycodone hydrochloride             |
| 64459 | Paracetamol/Tramadol hydrochloride  |
| 64463 | Methadone hydrochloride             |
| 64496 | Tramadol hydrochloride              |
| 64545 | Paracetamol/Codeine phosphate       |
| 64552 | Oxycodone hydrochloride             |
| 64726 | Codeine phosphate/Paracetamol       |
| 64731 | Tramadol hydrochloride              |
| 64751 | Codeine phosphate                   |
| 64752 | Codeine phosphate                   |
| 64780 | Morphine sulfate                    |
| 64781 | Morphine sulfate                    |
| 64807 | Oxycodone hydrochloride             |
| 64847 | Buprenorphine hydrochloride         |
| 64860 | Morphine sulfate                    |
| 64871 | Tramadol hydrochloride              |
| 64965 | Oxycodone hydrochloride             |
| 65035 | Paracetamol/Dihydrocodeine tartrate |
| 65092 | Codeine phosphate/Paracetamol       |
| 65118 | Codeine phosphate                   |
| 65157 | Buprenorphine hydrochloride         |
| 65168 | Fentanyl                            |
| 65245 | Codeine phosphate                   |
| 65266 | Tramadol hydrochloride              |
| 65269 | Codeine phosphate                   |
| 65314 | Paracetamol/Codeine phosphate       |
| 65359 | Fentanyl                            |
| 65372 | Diamorphine hydrochloride           |
| 65390 | Oxycodone hydrochloride             |
| 65392 | Oxycodone hydrochloride             |
| 65437 | Fentanyl                            |
| 65646 | Fentanyl citrate                    |
| 65689 | Dihydrocodeine tartrate             |
| 65806 | Paracetamol/Codeine phosphate       |
| 65904 | Codeine phosphate/Paracetamol       |
| 65932 | Oxycodone hydrochloride             |

---

---

|       |                                        |
|-------|----------------------------------------|
| 65933 | Oxycodone hydrochloride                |
| 65954 | Tramadol hydrochloride                 |
| 66115 | Codeine phosphate                      |
| 66121 | Dihydrocodeine tartrate                |
| 66280 | Buprenorphine                          |
| 66298 | Oxycodone hydrochloride                |
| 66299 | Tramadol hydrochloride                 |
| 66336 | Morphine Sulphate                      |
| 66352 | Paracetamol/Codeine phosphate          |
| 66463 | Buprenorphine                          |
| 66470 | Buprenorphine                          |
| 66538 | Codeine phosphate/Paracetamol          |
| 66553 | Codeine phosphate/Paracetamol          |
| 66602 | Caffeine/Codeine phosphate/Paracetamol |
| 66606 | Oxycodone hydrochloride                |
| 66616 | Oxycodone hydrochloride                |
| 66619 | Oxycodone hydrochloride                |
| 66654 | Diamorphine hydrochloride              |
| 66689 | Buprenorphine                          |
| 66695 | Buprenorphine                          |
| 66729 | Tramadol hydrochloride                 |
| 66760 | Oxycodone hydrochloride                |
| 66807 | Codeine Phosphate/Paracetamol          |
| 66815 | Morphine sulfate                       |
| 66837 | Oxycodone hydrochloride                |
| 66893 | Codeine phosphate                      |
| 66904 | Paracetamol/Codeine phosphate          |
| 66921 | Methadone hydrochloride                |
| 67018 | Buprenorphine                          |
| 67106 | Codeine phosphate/Paracetamol          |
| 67161 | Tramadol hydrochloride                 |
| 67197 | Tramadol hydrochloride                 |
| 67258 | Fentanyl                               |
| 67310 | Tramadol hydrochloride                 |
| 67323 | Tramadol hydrochloride                 |
| 67342 | Methadone hydrochloride                |
| 67356 | Buprenorphine                          |
| 67425 | Fentanyl                               |
| 67446 | Oxycodone hydrochloride                |
| 67474 | Fentanyl                               |
| 67599 | Pethidine hydrochloride                |
| 67744 | Tramadol hydrochloride                 |
| 67751 | Codeine phosphate                      |
| 67753 | Paracetamol/Codeine phosphate          |
| 67766 | Fentanyl                               |
| 67779 | Paracetamol/Dihydrocodeine tartrate    |

---



---

|       |                               |
|-------|-------------------------------|
| 67796 | Diamorphine hydrochloride     |
| 67830 | Fentanyl                      |
| 67901 | Buprenorphine                 |
| 68167 | Buprenorphine                 |
| 68172 | Buprenorphine                 |
| 68196 | Buprenorphine                 |
| 68209 | Fentanyl                      |
| 68210 | Tramadol hydrochloride        |
| 68241 | Buprenorphine                 |
| 68252 | Codeine phosphate/Paracetamol |
| 68402 | Buprenorphine                 |
| 68427 | Tramadol hydrochloride        |
| 68472 | Buprenorphine                 |
| 68479 | Buprenorphine                 |
| 68509 | Codeine phosphate             |
| 68538 | Codeine phosphate             |
| 68559 | Buprenorphine                 |
| 68712 | Morphine hydrochloride        |
| 68743 | Buprenorphine                 |
| 68797 | Oxycodone hydrochloride       |
| 68833 | Tramadol hydrochloride        |
| 68848 | Buprenorphine                 |
| 68861 | Codeine phosphate             |
| 68888 | Buprenorphine                 |
| 68889 | Buprenorphine                 |
| 68890 | Buprenorphine                 |
| 68959 | Methadone hydrochloride       |
| 69023 | Fentanyl                      |
| 69053 | Methadone hydrochloride       |
| 69063 | Hydromorphone hydrochloride   |
| 69066 | Codeine phosphate             |
| 69243 | Buprenorphine                 |
| 69254 | Buprenorphine                 |
| 69285 | Ibuprofen/Codeine phosphate   |
| 69304 | Codeine phosphate/Paracetamol |
| 69315 | Buprenorphine                 |
| 69474 | Oxycodone hydrochloride       |
| 69559 | Oxycodone hydrochloride       |
| 69576 | Codeine phosphate             |
| 69795 | Buprenorphine                 |
| 69894 | Tramadol hydrochloride        |
| 69942 | Buprenorphine hydrochloride   |
| 69993 | Oxycodone hydrochloride       |
| 70117 | Buprenorphine                 |
| 70123 | Oxycodone hydrochloride       |
| 70124 | Buprenorphine                 |

---

---

|       |                                        |
|-------|----------------------------------------|
| 70139 | Buprenorphine                          |
| 70267 | Methadone hydrochloride                |
| 70274 | Morphine sulfate                       |
| 70376 | Fentanyl                               |
| 70460 | Buprenorphine                          |
| 70461 | Buprenorphine                          |
| 70464 | Buprenorphine hydrochloride            |
| 70497 | Paracetamol/Codeine phosphate          |
| 70518 | Paracetamol/Codeine phosphate          |
| 70552 | Codeine phosphate                      |
| 70631 | Buprenorphine                          |
| 70800 | Hydromorphone hydrochloride            |
| 70801 | Hydromorphone hydrochloride            |
| 70810 | Fentanyl                               |
| 70988 | Fentanyl                               |
| 71006 | Paracetamol/Dihydrocodeine tartrate    |
| 71170 | Pentazocine hydrochloride              |
| 71171 | Morphine sulfate                       |
| 71227 | Paracetamol/Codeine phosphate/Caffeine |
| 71310 | Buprenorphine                          |
| 71335 | Oxycodone hydrochloride                |
| 71355 | Tramadol hydrochloride                 |
| 71358 | Tramadol hydrochloride                 |
| 71462 | Morphine sulfate                       |
| 71492 | Codeine phosphate                      |
| 71523 | Paracetamol/Dihydrocodeine tartrate    |
| 71566 | Dihydrocodeine tartrate/Paracetamol    |
| 71614 | Codeine phosphate/Paracetamol          |
| 71630 | Buprenorphine hydrochloride            |
| 71695 | Buprenorphine hydrochloride            |
| 71711 | Buprenorphine                          |
| 72098 | Buprenorphine                          |
| 72110 | Dihydrocodeine tartrate/Paracetamol    |
| 72111 | Paracetamol/Dihydrocodeine tartrate    |
| 72160 | Buprenorphine                          |
| 72209 | Dihydrocodeine tartrate                |
| 72210 | Dihydrocodeine tartrate                |
| 72225 | Morphine sulfate                       |
| 72255 | Morphine sulfate                       |
| 72258 | Dihydrocodeine tartrate/Paracetamol    |
| 72265 | Dihydrocodeine tartrate                |
| 72282 | Paracetamol/Dihydrocodeine tartrate    |
| 72342 | Fentanyl                               |
| 72389 | Paracetamol/Codeine phosphate          |
| 72438 | Codeine phosphate                      |
| 72457 | Morphine sulfate                       |

---

---

|       |                        |
|-------|------------------------|
| 72646 | Tramadol hydrochloride |
|-------|------------------------|

---

*Calcium-channel blockers*

| Product Code | Substance Name          |
|--------------|-------------------------|
| 29           | Amlodipine              |
| 71           | Amlodipine              |
| 219          | Diltiazem hydrochloride |
| 269          | Nifedipine              |
| 410          | Nifedipine              |
| 452          | Nifedipine              |
| 491          | Felodipine              |
| 501          | Felodipine              |
| 517          | Diltiazem Hydrochloride |
| 536          | Diltiazem hydrochloride |
| 541          | Nifedipine              |
| 568          | Felodipine              |
| 636          | Diltiazem hydrochloride |
| 662          | Nifedipine              |
| 700          | Verapamil hydrochloride |
| 729          | Amlodipine              |
| 737          | Nifedipine              |
| 749          | Amlodipine              |
| 793          | Diltiazem hydrochloride |
| 939          | Diltiazem hydrochloride |
| 1118         | Verapamil hydrochloride |
| 1120         | Verapamil hydrochloride |
| 1130         | Diltiazem hydrochloride |
| 1262         | Nifedipine              |
| 1289         | Diltiazem hydrochloride |
| 1298         | Verapamil hydrochloride |
| 1300         | Nifedipine              |
| 1449         | Nifedipine              |
| 1529         | Mibefradil              |
| 1538         | Diltiazem Hydrochloride |
| 1574         | Verapamil hydrochloride |
| 1684         | Atenolol/Nifedipine     |
| 1686         | Diltiazem hydrochloride |
| 1747         | Verapamil hydrochloride |
| 1748         | Verapamil hydrochloride |
| 1836         | Diltiazem hydrochloride |
| 1854         | Nifedipine              |
| 1995         | Diltiazem Hydrochloride |
| 2280         | Nifedipine              |
| 2343         | Nifedipine              |
| 2453         | Diltiazem Hydrochloride |

---

---

|      |                           |
|------|---------------------------|
| 2521 | Nifedipine                |
| 2528 | Diltiazem hydrochloride   |
| 2592 | Diltiazem hydrochloride   |
| 2605 | Nifedipine                |
| 2663 | Diltiazem Hydrochloride   |
| 2686 | Diltiazem hydrochloride   |
| 2746 | Nifedipine                |
| 2811 | Diltiazem Hydrochloride   |
| 2888 | Diltiazem hydrochloride   |
| 2926 | Nicardipine hydrochloride |
| 3057 | Verapamil hydrochloride   |
| 3061 | Diltiazem Hydrochloride   |
| 3118 | Diltiazem hydrochloride   |
| 3221 | Lacidipine                |
| 3302 | Nicardipine hydrochloride |
| 3342 | Verapamil hydrochloride   |
| 3343 | Verapamil hydrochloride   |
| 3370 | Diltiazem Hydrochloride   |
| 3676 | Diltiazem Hydrochloride   |
| 3711 | Nifedipine                |
| 3712 | Nifedipine                |
| 3917 | Amlodipine                |
| 3930 | Nifedipine                |
| 3931 | Mibefradil                |
| 3943 | Verapamil hydrochloride   |
| 4227 | Nifedipine                |
| 4239 | Nifedipine                |
| 4308 | Diltiazem hydrochloride   |
| 4408 | Diltiazem hydrochloride   |
| 4542 | Atenolol/Nifedipine       |
| 4635 | Diltiazem hydrochloride   |
| 4732 | Diltiazem hydrochloride   |
| 4808 | Diltiazem hydrochloride   |
| 4852 | Diltiazem hydrochloride   |
| 4856 | Nifedipine                |
| 4923 | Diltiazem Hydrochloride   |
| 4939 | Nifedipine                |
| 5054 | Diltiazem hydrochloride   |
| 5158 | Lacidipine                |
| 5162 | Nifedipine                |
| 5181 | Nifedipine                |
| 5194 | Diltiazem Hydrochloride   |
| 5234 | Diltiazem hydrochloride   |
| 5277 | Nifedipine                |
| 5296 | Diltiazem hydrochloride   |
| 5326 | Diltiazem Hydrochloride   |

---

---

|       |                             |
|-------|-----------------------------|
| 5348  | Diltiazem hydrochloride     |
| 5477  | Nicardipine hydrochloride   |
| 5513  | Diltiazem hydrochloride     |
| 5570  | Lercanidipine hydrochloride |
| 5593  | Lercanidipine hydrochloride |
| 5806  | Nifedipine                  |
| 5914  | Amlodipine                  |
| 6309  | Diltiazem hydrochloride     |
| 6477  | Amlodipine                  |
| 6510  | Verapamil hydrochloride     |
| 6856  | Amlodipine                  |
| 7280  | Felodipine                  |
| 7398  | Diltiazem hydrochloride     |
| 7541  | Nifedipine                  |
| 7562  | Nicardipine hydrochloride   |
| 7681  | Prenylamine Lactate         |
| 8201  | Nicardipine hydrochloride   |
| 8213  | Nifedipine                  |
| 8257  | Isradipine                  |
| 8310  | Isradipine                  |
| 8524  | Verapamil hydrochloride     |
| 8558  | Diltiazem Hydrochloride     |
| 8642  | Atenolol/Nifedipine         |
| 8759  | Verapamil Hydrochloride     |
| 8884  | Verapamil hydrochloride     |
| 8945  | Verapamil hydrochloride     |
| 8975  | Verapamil hydrochloride     |
| 9240  | Diltiazem Hydrochloride     |
| 9269  | Nifedipine                  |
| 9334  | Felodipine                  |
| 9374  | Diltiazem hydrochloride     |
| 9386  | Nicardipine hydrochloride   |
| 9410  | Diltiazem hydrochloride     |
| 9437  | Felodipine                  |
| 9485  | Nifedipine                  |
| 9553  | Nifedipine                  |
| 9569  | Verapamil hydrochloride     |
| 9573  | Nifedipine                  |
| 9670  | Lacidipine                  |
| 9708  | Diltiazem Hydrochloride     |
| 9723  | Diltiazem hydrochloride     |
| 9750  | Nifedipine                  |
| 9919  | Diltiazem hydrochloride     |
| 10135 | Nifedipine                  |
| 10136 | Nifedipine                  |
| 10153 | Felodipine                  |

---

---

|       |                             |
|-------|-----------------------------|
| 10246 | Nifedipine                  |
| 10267 | Diltiazem hydrochloride     |
| 10595 | Nimodipine                  |
| 10688 | Verapamil hydrochloride     |
| 10832 | Verapamil hydrochloride     |
| 11223 | Diltiazem hydrochloride     |
| 11512 | Nifedipine                  |
| 11547 | Nimodipine                  |
| 11567 | Felodipine/Ramipril         |
| 11769 | Nifedipine                  |
| 11770 | Diltiazem hydrochloride     |
| 11777 | Verapamil hydrochloride     |
| 11922 | Diltiazem hydrochloride     |
| 11943 | Nicardipine hydrochloride   |
| 11965 | Felodipine/Ramipril         |
| 11966 | Lacidipine                  |
| 11972 | Verapamil hydrochloride     |
| 11973 | Diltiazem hydrochloride     |
| 12104 | Verapamil hydrochloride     |
| 12392 | Verapamil hydrochloride     |
| 12606 | Nifedipine                  |
| 12613 | Nifedipine                  |
| 12639 | Diltiazem hydrochloride     |
| 12705 | Diltiazem hydrochloride     |
| 12875 | Nicardipine hydrochloride   |
| 13027 | Diltiazem hydrochloride     |
| 13033 | Diltiazem hydrochloride     |
| 13075 | Diltiazem hydrochloride     |
| 13127 | Diltiazem hydrochloride     |
| 13139 | Nifedipine                  |
| 13240 | Diltiazem hydrochloride     |
| 13243 | Lercanidipine hydrochloride |
| 13251 | Verapamil hydrochloride     |
| 13302 | Diltiazem hydrochloride     |
| 13410 | Diltiazem hydrochloride     |
| 13672 | Nifedipine                  |
| 13699 | Nifedipine                  |
| 13856 | Verapamil hydrochloride     |
| 13926 | Diltiazem hydrochloride     |
| 13965 | Verapamil hydrochloride     |
| 14300 | Lercanidipine hydrochloride |
| 14305 | Felodipine                  |
| 14861 | Nifedipine                  |
| 15117 | Nifedipine/Atenolol         |
| 15221 | Diltiazem Hydrochloride     |
| 15288 | Diltiazem hydrochloride     |

---

---

|       |                                             |
|-------|---------------------------------------------|
| 15652 | Mibefradil                                  |
| 15715 | Nifedipine                                  |
| 16038 | Diltiazem hydrochloride                     |
| 16073 | Nifedipine                                  |
| 16162 | Amlodipine                                  |
| 16328 | Verapamil hydrochloride                     |
| 16677 | Verapamil hydrochloride                     |
| 16850 | Diltiazem hydrochloride                     |
| 17006 | Felodipine/Ramipril                         |
| 17325 | Nifedipine                                  |
| 17338 | Nifedipine                                  |
| 17342 | Nifedipine                                  |
| 17406 | Diltiazem hydrochloride                     |
| 17425 | Diltiazem hydrochloride                     |
| 17448 | Nifedipine                                  |
| 17474 | Felodipine/Ramipril                         |
| 17492 | Diltiazem hydrochloride                     |
| 17557 | Felodipine                                  |
| 17566 | Felodipine                                  |
| 17586 | Diltiazem hydrochloride                     |
| 17599 | Verapamil hydrochloride                     |
| 17640 | Amlodipine                                  |
| 17666 | Diltiazem hydrochloride                     |
| 18038 | Nisoldipine                                 |
| 18223 | Verapamil Hydrochloride/Trandolapril        |
| 18379 | Diltiazem hydrochloride                     |
| 18403 | Diltiazem Hydrochloride                     |
| 18404 | Diltiazem hydrochloride                     |
| 18606 | Diltiazem Hydrochloride/Hydrochlorothiazide |
| 18830 | Diltiazem hydrochloride                     |
| 18834 | Diltiazem hydrochloride                     |
| 18852 | Diltiazem hydrochloride                     |
| 18874 | Diltiazem hydrochloride                     |
| 18975 | Diltiazem hydrochloride                     |
| 19013 | Lidoflazine                                 |
| 19129 | Nisoldipine                                 |
| 19170 | Nifedipine                                  |
| 19175 | Verapamil hydrochloride                     |
| 19325 | Verapamil hydrochloride                     |
| 19426 | Diltiazem hydrochloride                     |
| 19440 | Diltiazem hydrochloride                     |
| 19457 | Verapamil hydrochloride                     |
| 19459 | Verapamil hydrochloride                     |
| 19690 | Verapamil hydrochloride/Trandolapril        |
| 20257 | Nifedipine                                  |
| 20311 | Nifedipine                                  |

---

---

|       |                                             |
|-------|---------------------------------------------|
| 20459 | Felodipine                                  |
| 20579 | Verapamil hydrochloride/Trandolapril        |
| 20591 | Nifedipine                                  |
| 20642 | Diltiazem hydrochloride                     |
| 20878 | Nifedipine                                  |
| 20890 | Diltiazem hydrochloride                     |
| 21145 | Diltiazem hydrochloride                     |
| 21162 | Felodipine/Ramipril                         |
| 21216 | Nifedipine                                  |
| 21245 | Nifedipine                                  |
| 21763 | Diltiazem hydrochloride                     |
| 21773 | Diltiazem hydrochloride                     |
| 21778 | Diltiazem hydrochloride                     |
| 21795 | Diltiazem hydrochloride                     |
| 21872 | Nifedipine                                  |
| 21886 | Nifedipine                                  |
| 21918 | Diltiazem hydrochloride                     |
| 22019 | Nifedipine                                  |
| 22142 | Nifedipine                                  |
| 22217 | Nifedipine                                  |
| 22241 | Mibefradil                                  |
| 22619 | Diltiazem hydrochloride                     |
| 22696 | Nifedipine                                  |
| 22826 | Verapamil hydrochloride                     |
| 23233 | Diltiazem hydrochloride                     |
| 23505 | Diltiazem Hydrochloride/Hydrochlorothiazide |
| 23733 | Diltiazem hydrochloride                     |
| 23736 | Nifedipine                                  |
| 23805 | Nisoldipine                                 |
| 23823 | Nisoldipine                                 |
| 23872 | Verapamil hydrochloride                     |
| 24228 | Nifedipine                                  |
| 24365 | Felodipine                                  |
| 24366 | Felodipine                                  |
| 25059 | Verapamil hydrochloride                     |
| 25132 | Nifedipine                                  |
| 25572 | Felodipine                                  |
| 25646 | Nifedipine                                  |
| 25777 | Diltiazem hydrochloride                     |
| 25919 | Nifedipine                                  |
| 26252 | Verapamil hydrochloride                     |
| 26265 | Nifedipine                                  |
| 26267 | Diltiazem Hydrochloride                     |
| 26269 | Diltiazem Hydrochloride                     |
| 26270 | Diltiazem hydrochloride                     |
| 26309 | Diltiazem hydrochloride                     |

---



---

|       |                         |
|-------|-------------------------|
| 26337 | Felodipine              |
| 26460 | Diltiazem hydrochloride |
| 26463 | Diltiazem hydrochloride |
| 26674 | Verapamil hydrochloride |
| 26759 | Diltiazem hydrochloride |
| 26774 | Nifedipine              |
| 27135 | Diltiazem hydrochloride |
| 27136 | Diltiazem hydrochloride |
| 27295 | Verapamil hydrochloride |
| 27401 | Diltiazem hydrochloride |
| 27685 | Diltiazem hydrochloride |
| 28438 | Felodipine/Ramipril     |
| 28688 | Nifedipine              |
| 28721 | Felodipine              |
| 28843 | Verapamil hydrochloride |
| 28844 | Verapamil hydrochloride |
| 28949 | Diltiazem Hydrochloride |
| 29044 | Felodipine              |
| 29145 | Felodipine              |
| 29637 | Verapamil hydrochloride |
| 29676 | Diltiazem hydrochloride |
| 30197 | Diltiazem hydrochloride |
| 30199 | Nifedipine              |
| 30242 | Diltiazem hydrochloride |
| 30462 | Verapamil hydrochloride |
| 30473 | Nifedipine              |
| 30557 | Felodipine              |
| 30758 | Lidoflazine             |
| 30915 | Felodipine              |
| 30991 | Felodipine              |
| 31336 | Nisoldipine             |
| 31337 | Nisoldipine             |
| 31489 | Diltiazem hydrochloride |
| 31490 | Verapamil hydrochloride |
| 31676 | Diltiazem hydrochloride |
| 31711 | Verapamil hydrochloride |
| 31737 | Diltiazem hydrochloride |
| 31761 | Amlodipine              |
| 32089 | Diltiazem Hydrochloride |
| 32262 | Diltiazem hydrochloride |
| 32590 | Verapamil hydrochloride |
| 32595 | Amlodipine              |
| 32658 | Diltiazem Hydrochloride |
| 32870 | Diltiazem hydrochloride |
| 32917 | Amlodipine              |
| 32922 | Felodipine              |

---

---

|       |                               |
|-------|-------------------------------|
| 33025 | Nifedipine                    |
| 33091 | Felodipine                    |
| 33471 | Verapamil hydrochloride       |
| 33932 | Felodipine                    |
| 34093 | Amlodipine                    |
| 34101 | Nifedipine                    |
| 34115 | Nifedipine                    |
| 34146 | Nifedipine                    |
| 34187 | Nifedipine                    |
| 34247 | Nifedipine                    |
| 34377 | Diltiazem hydrochloride       |
| 34475 | Diltiazem hydrochloride       |
| 34522 | Nifedipine                    |
| 34581 | Diltiazem hydrochloride       |
| 34607 | Nifedipine                    |
| 34824 | Diltiazem hydrochloride       |
| 34959 | Verapamil hydrochloride       |
| 34975 | Nifedipine                    |
| 35084 | Felodipine                    |
| 35096 | Valsartan/Amlodipine besilate |
| 35173 | Amlodipine Besilate/Valsartan |
| 35174 | Amlodipine Besilate/Valsartan |
| 35189 | Valsartan/Amlodipine besilate |
| 35304 | Amlodipine Besilate/Valsartan |
| 35317 | Valsartan/Amlodipine besilate |
| 35329 | Valsartan/Amlodipine besilate |
| 35343 | Valsartan/Amlodipine besilate |
| 35592 | Felodipine                    |
| 35646 | Nifedipine                    |
| 35696 | Diltiazem hydrochloride       |
| 35697 | Valsartan/Amlodipine besilate |
| 35729 | Verapamil hydrochloride       |
| 36202 | Amlodipine                    |
| 36583 | Diltiazem Hydrochloride       |
| 36620 | Felodipine                    |
| 36664 | Diltiazem hydrochloride       |
| 37025 | Nifedipine                    |
| 37184 | Nifedipine                    |
| 37530 | Nifedipine                    |
| 37726 | Nifedipine                    |
| 37774 | Diltiazem hydrochloride       |
| 37897 | Felodipine                    |
| 38066 | Diltiazem hydrochloride       |
| 38107 | Nifedipine                    |
| 38434 | Felodipine                    |
| 38545 | Diltiazem hydrochloride       |

---

---

|       |                                          |
|-------|------------------------------------------|
| 38632 | Diltiazem hydrochloride                  |
| 38634 | Diltiazem hydrochloride                  |
| 38818 | Diltiazem hydrochloride                  |
| 38831 | Diltiazem hydrochloride                  |
| 38855 | Diltiazem hydrochloride                  |
| 38865 | Diltiazem hydrochloride                  |
| 38876 | Diltiazem hydrochloride                  |
| 38882 | Diltiazem hydrochloride                  |
| 38964 | Diltiazem hydrochloride                  |
| 39009 | Verapamil hydrochloride                  |
| 39171 | Diltiazem hydrochloride                  |
| 39298 | Diltiazem hydrochloride                  |
| 39357 | Felodipine                               |
| 39800 | Nifedipine                               |
| 39804 | Amlodipine                               |
| 39914 | Amlodipine                               |
| 39984 | Olmesartan medoxomil/Amlodipine besilate |
| 40074 | Nifedipine                               |
| 40316 | Olmesartan medoxomil/Amlodipine besilate |
| 40405 | Verapamil hydrochloride                  |
| 40633 | Felodipine                               |
| 40639 | Olmesartan medoxomil/Amlodipine besilate |
| 40668 | Olmesartan medoxomil/Amlodipine besilate |
| 41203 | Olmesartan medoxomil/Amlodipine besilate |
| 41205 | Olmesartan medoxomil/Amlodipine besilate |
| 41489 | Diltiazem hydrochloride                  |
| 41586 | Verapamil hydrochloride                  |
| 41635 | Diltiazem hydrochloride                  |
| 41679 | Verapamil hydrochloride                  |
| 41693 | Verapamil hydrochloride                  |
| 41979 | Nifedipine                               |
| 42210 | Amlodipine                               |
| 42625 | Verapamil hydrochloride                  |
| 42731 | Diltiazem Hydrochloride                  |
| 42804 | Diltiazem Hydrochloride                  |
| 42819 | Diltiazem hydrochloride                  |
| 42912 | Nifedipine                               |
| 43222 | Nifedipine                               |
| 43394 | Felodipine                               |
| 43410 | Nifedipine                               |
| 43430 | Diltiazem hydrochloride                  |
| 43470 | Amlodipine                               |
| 43511 | Nifedipine                               |
| 43512 | Felodipine                               |
| 43515 | Nifedipine                               |
| 43753 | Nifedipine                               |

---

---

|       |                             |
|-------|-----------------------------|
| 43790 | Felodipine                  |
| 43818 | Nifedipine                  |
| 43879 | Verapamil hydrochloride     |
| 43880 | Amlodipine                  |
| 44192 | Diltiazem hydrochloride     |
| 44859 | Felodipine                  |
| 44887 | Diltiazem hydrochloride     |
| 45051 | Verapamil hydrochloride     |
| 45070 | Amlodipine                  |
| 45279 | Amlodipine                  |
| 45292 | Nicardipine hydrochloride   |
| 45308 | Verapamil hydrochloride     |
| 45564 | Diltiazem hydrochloride     |
| 45685 | Nifedipine                  |
| 45759 | Diltiazem hydrochloride     |
| 46009 | Verapamil hydrochloride     |
| 46233 | Amlodipine                  |
| 46445 | Nifedipine                  |
| 46724 | Amlodipine                  |
| 46884 | Verapamil hydrochloride     |
| 46887 | Nifedipine                  |
| 46937 | Diltiazem hydrochloride     |
| 46955 | Verapamil hydrochloride     |
| 47002 | Amlodipine                  |
| 47027 | Nifedipine                  |
| 47217 | Nifedipine                  |
| 47222 | Verapamil hydrochloride     |
| 47230 | Verapamil hydrochloride     |
| 47285 | Nifedipine                  |
| 47331 | Lercanidipine hydrochloride |
| 47415 | Diltiazem hydrochloride     |
| 47529 | Nifedipine                  |
| 47530 | Diltiazem hydrochloride     |
| 47608 | Diltiazem hydrochloride     |
| 47614 | Nifedipine                  |
| 47707 | Nifedipine                  |
| 47724 | Diltiazem hydrochloride     |
| 47732 | Diltiazem hydrochloride     |
| 47887 | Nifedipine                  |
| 47996 | Diltiazem hydrochloride     |
| 48009 | Felodipine                  |
| 48272 | Diltiazem hydrochloride     |
| 48282 | Diltiazem hydrochloride     |
| 48288 | Diltiazem hydrochloride     |
| 48457 | Diltiazem hydrochloride     |
| 48870 | Diltiazem hydrochloride     |

---

---

|       |                             |
|-------|-----------------------------|
| 49001 | Diltiazem hydrochloride     |
| 49237 | Diltiazem hydrochloride     |
| 49289 | Diltiazem hydrochloride     |
| 49338 | Nifedipine                  |
| 49390 | Diltiazem hydrochloride     |
| 49500 | Diltiazem hydrochloride     |
| 49636 | Amlodipine                  |
| 49762 | Nifedipine                  |
| 51261 | Diltiazem hydrochloride     |
| 51461 | Verapamil hydrochloride     |
| 51489 | Diltiazem hydrochloride     |
| 51917 | Nifedipine                  |
| 52017 | Nifedipine                  |
| 52276 | Diltiazem hydrochloride     |
| 52440 | Amlodipine                  |
| 52701 | Diltiazem hydrochloride     |
| 52728 | Atenolol/Nifedipine         |
| 53278 | Nifedipine                  |
| 53357 | Nifedipine                  |
| 53500 | Nifedipine                  |
| 53629 | Nifedipine                  |
| 53868 | Amlodipine                  |
| 53990 | Nifedipine                  |
| 54515 | Amlodipine                  |
| 54633 | Amlodipine                  |
| 54654 | Amlodipine                  |
| 54696 | Amlodipine                  |
| 54799 | Diltiazem hydrochloride     |
| 54983 | Amlodipine                  |
| 55257 | Diltiazem hydrochloride     |
| 55306 | Felodipine                  |
| 55455 | Nifedipine                  |
| 55740 | Felodipine                  |
| 55824 | Nifedipine                  |
| 56147 | Amlodipine                  |
| 56271 | Diltiazem hydrochloride     |
| 56334 | Amlodipine                  |
| 56467 | Diltiazem hydrochloride     |
| 56469 | Nifedipine                  |
| 56758 | Diltiazem hydrochloride     |
| 56767 | Lercanidipine hydrochloride |
| 56994 | Lacidipine                  |
| 57208 | Diltiazem hydrochloride     |
| 57444 | Lercanidipine hydrochloride |
| 57531 | Nifedipine                  |
| 57594 | Diltiazem hydrochloride     |

---

---

|       |                                          |
|-------|------------------------------------------|
| 57653 | Nifedipine                               |
| 57680 | Lacidipine                               |
| 57859 | Diltiazem hydrochloride                  |
| 58339 | Felodipine                               |
| 58557 | Nifedipine                               |
| 58580 | Amlodipine                               |
| 58990 | Nifedipine                               |
| 59001 | Amlodipine                               |
| 59098 | Diltiazem hydrochloride                  |
| 59163 | Nifedipine                               |
| 59233 | Lercanidipine hydrochloride              |
| 59264 | Verapamil hydrochloride                  |
| 59585 | Diltiazem hydrochloride                  |
| 59762 | Amlodipine                               |
| 59863 | Diltiazem hydrochloride                  |
| 60067 | Amlodipine besilate/Perindopril erbumine |
| 60244 | Amlodipine                               |
| 60415 | Diltiazem hydrochloride                  |
| 60569 | Felodipine                               |
| 60620 | Diltiazem hydrochloride                  |
| 60652 | Felodipine                               |
| 60684 | Perindopril erbumine/Amlodipine besilate |
| 60699 | Lacidipine                               |
| 60744 | Amlodipine besilate/Perindopril erbumine |
| 60856 | Nifedipine                               |
| 60884 | Felodipine                               |
| 61010 | Diltiazem hydrochloride                  |
| 61230 | Perhexiline Maleate                      |
| 61245 | Diltiazem hydrochloride                  |
| 61374 | Amlodipine                               |
| 61422 | Amlodipine                               |
| 61532 | Diltiazem hydrochloride                  |
| 61611 | Lercanidipine hydrochloride              |
| 61719 | Atenolol/Nifedipine                      |
| 62064 | Diltiazem hydrochloride                  |
| 62065 | Diltiazem hydrochloride                  |
| 62207 | Diltiazem hydrochloride                  |
| 62552 | Verapamil hydrochloride                  |
| 62912 | Diltiazem hydrochloride                  |
| 63041 | Nifedipine                               |
| 63149 | Amlodipine besilate/Perindopril erbumine |
| 63246 | Nifedipine                               |
| 63331 | Felodipine                               |
| 63515 | Amlodipine                               |
| 63917 | Lercanidipine hydrochloride              |
| 64166 | Amlodipine                               |

---

---

|       |                             |
|-------|-----------------------------|
| 64227 | Lercanidipine hydrochloride |
| 64327 | Amlodipine                  |
| 64418 | Amlodipine                  |
| 64424 | Lercanidipine hydrochloride |
| 64441 | Amlodipine                  |
| 64447 | Amlodipine                  |
| 64474 | Felodipine                  |
| 64504 | Felodipine                  |
| 64606 | Amlodipine                  |
| 64623 | Amlodipine                  |
| 64624 | Diltiazem hydrochloride     |
| 64719 | Felodipine                  |
| 64760 | Felodipine                  |
| 64917 | Felodipine                  |
| 65349 | Felodipine                  |
| 65504 | Diltiazem hydrochloride     |
| 65602 | Diltiazem hydrochloride     |
| 65636 | Diltiazem hydrochloride     |
| 65659 | Lercanidipine hydrochloride |
| 65745 | Amlodipine                  |
| 66048 | Diltiazem hydrochloride     |
| 66095 | Felodipine                  |
| 66172 | Diltiazem hydrochloride     |
| 66191 | Nifedipine                  |
| 66236 | Nifedipine                  |
| 66430 | Amlodipine                  |
| 66574 | Amlodipine                  |
| 66635 | Diltiazem hydrochloride     |
| 66701 | Diltiazem hydrochloride     |
| 66817 | Amlodipine                  |
| 66834 | Diltiazem hydrochloride     |
| 66850 | Diltiazem hydrochloride     |
| 66910 | Felodipine                  |
| 67074 | Nifedipine                  |
| 67293 | Verapamil hydrochloride     |
| 67317 | Diltiazem hydrochloride     |
| 67344 | Diltiazem hydrochloride     |
| 67662 | Amlodipine                  |
| 67890 | Diltiazem hydrochloride     |
| 68020 | Atenolol/Nifedipine         |
| 68054 | Diltiazem hydrochloride     |
| 68181 | Felodipine                  |
| 68221 | Amlodipine                  |
| 68311 | Amlodipine                  |
| 68429 | Diltiazem hydrochloride     |
| 68499 | Felodipine                  |

---

---

|       |                             |
|-------|-----------------------------|
| 68531 | Verapamil hydrochloride     |
| 68828 | Felodipine                  |
| 69028 | Diltiazem hydrochloride     |
| 69108 | Diltiazem hydrochloride     |
| 69116 | Diltiazem hydrochloride     |
| 69202 | Nifedipine                  |
| 69206 | Felodipine                  |
| 69239 | Lercanidipine hydrochloride |
| 69277 | Diltiazem hydrochloride     |
| 69668 | Nifedipine                  |
| 69818 | Diltiazem hydrochloride     |
| 70306 | Diltiazem hydrochloride     |
| 70732 | Lercanidipine hydrochloride |
| 70827 | Lercanidipine hydrochloride |
| 70961 | Diltiazem hydrochloride     |
| 70990 | Lacidipine                  |
| 70999 | Amlodipine                  |
| 71009 | Verapamil hydrochloride     |
| 71018 | Lercanidipine hydrochloride |
| 71030 | Lercanidipine hydrochloride |
| 71339 | Nifedipine                  |
| 71342 | Diltiazem hydrochloride     |
| 71344 | Amlodipine                  |
| 71353 | Amlodipine                  |
| 71413 | Diltiazem hydrochloride     |
| 71529 | Nimodipine                  |
| 71601 | Nifedipine                  |
| 71653 | Nifedipine                  |
| 71702 | Diltiazem hydrochloride     |
| 71744 | Diltiazem hydrochloride     |
| 71760 | Nifedipine                  |
| 71939 | Amlodipine                  |
| 71969 | Diltiazem hydrochloride     |
| 72049 | Amlodipine                  |
| 72091 | Diltiazem hydrochloride     |
| 72181 | Felodipine                  |
| 72199 | Amlodipine                  |
| 72221 | Felodipine                  |
| 72253 | Nifedipine                  |
| 72321 | Nifedipine                  |
| 72430 | Amlodipine                  |
| 72488 | Diltiazem hydrochloride     |

---



*Anticholinergic agents*

| Product Code | Substance Name                                        |
|--------------|-------------------------------------------------------|
| 50           | Paroxetine hydrochloride                              |
| 228          | Perphenazine                                          |
| 284          | Thioridazine hydrochloride                            |
| 312          | Atropine Sulphate                                     |
| 326          | Carbinoxamine/Ephedrine Hydrochloride/Pholcodine      |
| 355          | Oxybutynin hydrochloride                              |
| 527          | Paroxetine hydrochloride                              |
| 552          | Trihexyphenidyl hydrochloride                         |
| 558          | Pseudoephedrine hydrochloride/Brompheniramine maleate |
| 588          | Chlorpromazine hydrochloride                          |
| 609          | Perphenazine                                          |
| 683          | Hydroxyzine hydrochloride                             |
| 840          | Perphenazine                                          |
| 841          | Paroxetine hydrochloride                              |
| 867          | Diphenoxylate Hydrochloride/Atropine Sulphate         |
| 878          | Hydroxyzine hydrochloride                             |
| 918          | Promethazine hydrochloride                            |
| 989          | Promethazine teoclate                                 |
| 1159         | Trifluoperazine hydrochloride                         |
| 1162         | Thioridazine hydrochloride                            |
| 1192         | Thioridazine hydrochloride                            |
| 1218         | Thioridazine hydrochloride                            |
| 1244         | Brompheniramine maleate                               |
| 1245         | Trifluoperazine hydrochloride                         |
| 1249         | Olanzapine                                            |
| 1282         | Brompheniramine Maleate                               |
| 1304         | Oxybutynin hydrochloride                              |
| 1314         | Thioridazine hydrochloride                            |
| 1316         | Trifluoperazine hydrochloride                         |
| 1318         | Trifluoperazine hydrochloride                         |
| 1339         | Oxybutynin hydrochloride                              |
| 1358         | Diphenoxylate hydrochloride/Atropine sulfate          |
| 1397         | Paroxetine hydrochloride                              |
| 1516         | Diphenoxylate Hydrochloride/Atropine Sulphate         |
| 1517         | Flavoxate hydrochloride                               |
| 1546         | Hydroxyzine hydrochloride                             |
| 1575         | Paroxetine hydrochloride                              |
| 1610         | Promethazine hydrochloride                            |
| 1735         | Trifluoperazine hydrochloride                         |
| 1857         | Trifluoperazine hydrochloride                         |
| 1913         | Hydroxyzine hydrochloride                             |
| 1943         | Promethazine teoclate                                 |
| 1997         | Diphenhydramine Hydrochloride/Camphor/Calamine        |
| 1998         | Promethazine hydrochloride                            |

---

|      |                                                        |
|------|--------------------------------------------------------|
| 2018 | Diphenhydramine hydrochloride                          |
| 2072 | Dimenhydrinate                                         |
| 2090 | Pseudoephedrine Hydrochloride/Brompheniramine Maleate  |
| 2154 | Chlorpromazine hydrochloride                           |
| 2157 | Perphenazine                                           |
| 2178 | Codeine Phosphate/Promethazine Hydrochloride           |
| 2274 | Orphenadrine hydrochloride                             |
| 2278 | Orphenadrine hydrochloride                             |
| 2349 | Hydroxyzine hydrochloride                              |
| 2358 | Flavoxate hydrochloride                                |
| 2474 | Chlorpromazine hydrochloride                           |
| 2502 | Thioridazine hydrochloride                             |
| 2524 | Oxybutynin hydrochloride                               |
| 2529 | Tolterodine tartrate                                   |
| 2542 | Diphenhydramine Hydrochloride/Camphor/Calamine         |
| 2580 | Methocarbamol                                          |
| 2640 | Tolterodine tartrate                                   |
| 2656 | Olanzapine                                             |
| 2713 | Trifluoperazine hydrochloride                          |
| 2714 | Trifluoperazine hydrochloride                          |
| 2750 | Diphenhydramine hydrochloride                          |
| 2801 | Thioridazine Hydrochloride                             |
| 2814 | Chlorpromazine hydrochloride                           |
| 2959 | Propantheline bromide                                  |
| 3021 | Thioridazine hydrochloride                             |
| 3081 | Hydroxyzine hydrochloride                              |
| 3201 | Brompheniramine Maleate                                |
| 3259 | Benzatropine mesilate                                  |
| 3260 | Benzatropine mesilate                                  |
| 3281 | Olanzapine                                             |
| 3283 | Tolterodine tartrate                                   |
| 3284 | Propiverine hydrochloride                              |
| 3307 | Diphenoxylate Hydrochloride/Atropine Sulphate          |
| 3348 | Chlorpromazine hydrochloride                           |
| 3356 | Trifluoperazine Hydrochloride/Tranlycypromine Sulphate |
| 3430 | Oxybutynin hydrochloride                               |
| 3448 | Brompheniramine Maleate                                |
| 3494 | Promethazine hydrochloride                             |
| 3518 | Propantheline bromide                                  |
| 3579 | Thioridazine                                           |
| 3581 | Clemastine hydrogen fumarate                           |
| 3582 | Promethazine hydrochloride                             |
| 3601 | Paroxetine hydrochloride                               |
| 3605 | Thioridazine hydrochloride                             |
| 3772 | Chlorpromazine hydrochloride                           |
| 3922 | Tolterodine tartrate                                   |

---

---

|      |                                                                                                  |
|------|--------------------------------------------------------------------------------------------------|
| 3937 | Trifluoperazine hydrochloride                                                                    |
| 3952 | Chlorpromazine hydrochloride                                                                     |
| 3955 | Trifluoperazine Hydrochloride/Tranlycypromine Sulphate                                           |
| 4162 | Diphenhydramine Hydrochloride                                                                    |
| 4203 | Promethazine Hydrochloride/Paracetamol                                                           |
| 4223 | Methocarbamol                                                                                    |
| 4253 | Alcohol/Brompheniramine Maleate/Phenylephrine<br>Hydrochloride/Phenylpropanolamine Hydrochloride |
| 4324 | Alcohol/Brompheniramine Maleate/Phenylephrine<br>Hydrochloride/Phenylpropanolamine Hydrochloride |
| 4325 | Brompheniramine Maleate                                                                          |
| 4360 | Pseudoephedrine hydrochloride/Brompheniramine maleate                                            |
| 4434 | Chlorpromazine hydrochloride                                                                     |
| 4530 | Orphenadrine hydrochloride                                                                       |
| 4673 | Thioridazine hydrochloride                                                                       |
| 4824 | Hydroxyzine hydrochloride                                                                        |
| 4836 | Propiverine hydrochloride                                                                        |
| 5019 | Diphenoxylate hydrochloride/Atropine sulfate                                                     |
| 5039 | Quetiapine fumarate                                                                              |
| 5040 | Quetiapine fumarate                                                                              |
| 5139 | Diphenhydramine hydrochloride                                                                    |
| 5155 | Oxybutynin hydrochloride                                                                         |
| 5283 | Quetiapine fumarate                                                                              |
| 5399 | Oxybutynin hydrochloride                                                                         |
| 5450 | Diphenhydramine hydrochloride                                                                    |
| 5498 | Codeine Phosphate/Diphenhydramine<br>Hydrochloride/Caffeine/Paracetamol                          |
| 5537 | Oxybutynin hydrochloride                                                                         |
| 5561 | Promethazine hydrochloride                                                                       |
| 5573 | Oxybutynin hydrochloride                                                                         |
| 5595 | Tolterodine tartrate                                                                             |
| 5641 | Tolterodine tartrate                                                                             |
| 5653 | Olanzapine                                                                                       |
| 5685 | Codeine Phosphate/Doxylamine<br>Succinate/Caffeine/Paracetamol                                   |
| 5788 | Oxybutynin hydrochloride                                                                         |
| 5922 | Oxybutynin Hydrochloride                                                                         |
| 6010 | Oxybutynin hydrochloride                                                                         |
| 6023 | Olanzapine                                                                                       |
| 6162 | Diphenhydramine hydrochloride/Zinc oxide/Racemic<br>camphor                                      |
| 6290 | Brompheniramine maleate                                                                          |
| 6412 | Olanzapine                                                                                       |
| 6550 | Trihexyphenidyl Hydrochloride                                                                    |
| 6551 | Trihexyphenidyl hydrochloride                                                                    |
| 6641 | Tropium chloride                                                                                 |

---

---

|      |                                                             |
|------|-------------------------------------------------------------|
| 6838 | Olanzapine                                                  |
| 6850 | Olanzapine                                                  |
| 6864 | Quetiapine fumarate                                         |
| 6902 | Solifenacin succinate                                       |
| 6929 | Solifenacin succinate                                       |
| 7026 | Solifenacin succinate                                       |
| 7039 | Quetiapine fumarate                                         |
| 7215 | Trihexyphenidyl hydrochloride                               |
| 7234 | Trospium chloride                                           |
| 7438 | Promethazine Hydrochloride                                  |
| 7479 | Trifluoperazine Hydrochloride                               |
| 7493 | Chlorpromazine hydrochloride                                |
| 7514 | Chlorpromazine hydrochloride                                |
| 7534 | Levomenthol/Diphenhydramine hydrochloride/Codeine phosphate |
| 7623 | Trihexyphenidyl hydrochloride                               |
| 7670 | Flavoxate Hydrochloride                                     |
| 7671 | Flavoxate Hydrochloride                                     |
| 7838 | Oxybutynin hydrochloride                                    |
| 7878 | Trihexyphenidyl hydrochloride                               |
| 7919 | Perphenazine                                                |
| 8042 | Trifluoperazine hydrochloride                               |
| 8046 | Clozapine                                                   |
| 8047 | Clozapine                                                   |
| 8090 | Oxybutynin hydrochloride                                    |
| 8311 | Chlorpromazine Hydrochloride                                |
| 8337 | Brompheniramine maleate                                     |
| 8414 | Clemastine hydrogen fumarate                                |
| 8445 | Isopropamide Iodide/Trifluoperazine Hydrochloride           |
| 8455 | Diphenhydramine Hydrochloride/Camphor/Calamine              |
| 8458 | Clemastine hydrogen fumarate                                |
| 8506 | Chlorpromazine Hydrochloride                                |
| 8519 | Chlorpromazine hydrochloride                                |
| 8537 | Trifluoperazine Hydrochloride                               |
| 8547 | Trihexyphenidyl hydrochloride                               |
| 8771 | Chlorpromazine hydrochloride                                |
| 8774 | Thioridazine hydrochloride                                  |
| 8820 | Diphenhydramine Hydrochloride                               |
| 8937 | Dimenhydrinate                                              |
| 8985 | Trifluoperazine hydrochloride                               |
| 9190 | Chlorpromazine hydrochloride                                |
| 9387 | Thioridazine                                                |
| 9435 | Pseudoephedrine hydrochloride/Brompheniramine maleate       |
| 9729 | Pseudoephedrine hydrochloride/Brompheniramine maleate       |
| 9794 | Quetiapine fumarate                                         |
| 9813 | Pseudoephedrine hydrochloride/Brompheniramine maleate       |

---

---

|       |                                                                                    |
|-------|------------------------------------------------------------------------------------|
| 9818  | Pseudoephedrine hydrochloride/Brompheniramine maleate                              |
| 9856  | Guaifenesin/Pseudoephedrine hydrochloride/Brompheniramine maleate                  |
| 9947  | Diphenhydramine Hydrochloride/Dextromethorphan Hydrobromide/Levomenthol            |
| 9965  | Chlorpromazine embonate                                                            |
| 10107 | Quetiapine Fumarate                                                                |
| 10123 | Paracetamol/Diphenhydramine hydrochloride                                          |
| 10143 | Oxybutynin                                                                         |
| 10171 | Solifenacin succinate                                                              |
| 10281 | Diphenhydramine hydrochloride/Levomenthol                                          |
| 10297 | Pseudoephedrine Hydrochloride/Diphenhydramine Hydrochloride/Menthol/Sodium Citrate |
| 10405 | Thioridazine Hydrochloride                                                         |
| 10434 | Chlorpromazine hydrochloride                                                       |
| 10633 | Oxybutynin hydrochloride                                                           |
| 10675 | Thioridazine                                                                       |
| 10701 | Brompheniramine maleate/Pseudoephedrine hydrochloride/Codeine phosphate            |
| 10901 | Promethazine Hydrochloride/Paracetamol                                             |
| 10973 | Diphenoxylate Hydrochloride/Atropine Sulphate                                      |
| 11004 | Promethazine hydrochloride                                                         |
| 11509 | Diphenhydramine Hydrochloride/Ammonium Chloride                                    |
| 11531 | Trifluoperazine hydrochloride                                                      |
| 11706 | Diphenhydramine hydrochloride/Pholcodine                                           |
| 11790 | Oxybutynin                                                                         |
| 11925 | Paracetamol/Diphenhydramine hydrochloride                                          |
| 11945 | Codeine Phosphate/Doxylamine Succinate/Caffeine/Paracetamol                        |
| 12112 | Clemastine hydrogen fumarate                                                       |
| 12171 | Brompheniramine maleate/Pseudoephedrine hydrochloride/Codeine phosphate            |
| 12214 | Promethazine Hydrochloride                                                         |
| 12363 | Orphenadrine Hydrochloride                                                         |
| 12447 | Paracetamol/Orphenadrine Hydrochloride                                             |
| 12669 | Atropine sulfate                                                                   |
| 12732 | Diphenhydramine hydrochloride                                                      |
| 12842 | Diphenhydramine hydrochloride/Menthol/Dextromethorphan hydrobromide                |
| 12937 | Diphenhydramine hydrochloride                                                      |
| 13012 | Oxybutynin hydrochloride                                                           |
| 13145 | Trifluoperazine hydrochloride                                                      |
| 13319 | Buflinone/etfedrine/doxylamine Succinate/phenylephrine Hydrochloride               |
| 13820 | Olanzapine                                                                         |
| 13888 | Olanzapine                                                                         |

---

---

|       |                                                                                                      |
|-------|------------------------------------------------------------------------------------------------------|
| 13992 | Alcohol/Codeine Phosphate/Pseudoephedrine Hydrochloride/Brompheniramine Maleate                      |
| 14112 | Clozapine                                                                                            |
| 14151 | Paracetamol/Diphenhydramine hydrochloride                                                            |
| 14517 | Aspirin/Methocarbamol                                                                                |
| 14717 | Olanzapine                                                                                           |
| 14813 | Quetiapine fumarate                                                                                  |
| 14859 | Quetiapine fumarate                                                                                  |
| 14895 | Oxybutynin hydrochloride                                                                             |
| 14955 | Promethazine hydrochloride                                                                           |
| 14987 | Perphenazine                                                                                         |
| 14989 | Diphenhydramine Hydrochloride                                                                        |
| 15157 | Thioridazine                                                                                         |
| 15311 | Diphenhydramine hydrochloride/Levomethol                                                             |
| 15418 | Chlorpromazine embonate                                                                              |
| 15598 | Thioridazine Hydrochloride                                                                           |
| 15606 | Atropine sulfate                                                                                     |
| 15626 | Alcohol/Brompheniramine Maleate/Phenylephrine Hydrochloride/Phenylpropanolamine Hydrochloride        |
| 15845 | Paracetamol/Diphenhydramine hydrochloride                                                            |
| 15937 | Codeine Phosphate/Diphenhydramine Hydrochloride/Menthol                                              |
| 15969 | Diphenhydramine hydrochloride/Ammonium chloride/Sodium citrate                                       |
| 16016 | Oxybutynin hydrochloride                                                                             |
| 16103 | Olanzapine                                                                                           |
| 16178 | Pseudoephedrine hydrochloride/Levomethol/Diphenhydramine hydrochloride/Dextromethorphan hydrobromide |
| 16407 | Olanzapine                                                                                           |
| 16461 | Diphenhydramine hydrochloride                                                                        |
| 17087 | Perphenazine                                                                                         |
| 17109 | Atropine sulfate                                                                                     |
| 17127 | Diphenhydramine hydrochloride                                                                        |
| 17227 | Chlorpromazine hydrochloride                                                                         |
| 17399 | Thioridazine Hydrochloride                                                                           |
| 17412 | Paracetamol/Diphenhydramine hydrochloride                                                            |
| 17527 | Diphenhydramine Hydrochloride/Zinc Oxide/Racemic Camphor                                             |
| 17562 | Diphenhydramine hydrochloride/Pseudoephedrine hydrochloride                                          |
| 17784 | Hydroxyzine hydrochloride                                                                            |
| 17857 | Diphenoxylate hydrochloride/Atropine sulfate                                                         |
| 17958 | Clozapine                                                                                            |
| 18013 | Quetiapine fumarate                                                                                  |
| 18024 | Olanzapine                                                                                           |

---

---

|       |                                                                                    |
|-------|------------------------------------------------------------------------------------|
| 18193 | Promethazine hydrochloride/Pholcodine                                              |
| 18289 | Trifluoperazine Hydrochloride                                                      |
| 18296 | Methocarbamol                                                                      |
| 18370 | Methocarbamol                                                                      |
| 18453 | Olanzapine                                                                         |
| 18491 | Pethidine hydrochloride/Promethazine hydrochloride                                 |
| 18577 | Diphenhydramine hydrochloride                                                      |
| 18610 | Atropine Sulphate                                                                  |
| 18668 | Trifluoperazine Hydrochloride                                                      |
| 18688 | Orphenadrine hydrochloride                                                         |
| 18850 | Diphenhydramine hydrochloride/Pholcodine                                           |
| 18906 | Diphenhydramine hydrochloride                                                      |
| 18947 | Atropine Sulphate                                                                  |
| 19002 | Chlorpromazine Hydrochloride                                                       |
| 19116 | Pethidine hydrochloride/Promethazine hydrochloride                                 |
| 19380 | Benzatropine mesilate                                                              |
| 19479 | Promethazine hydrochloride/Pholcodine                                              |
| 19622 | Alcohol/Codeine Phosphate/Pseudoephedrine<br>Hydrochloride/Brompheniramine Maleate |
| 19854 | Codeine Phosphate/Doxylamine<br>Succinate/Caffeine/Paracetamol                     |
| 19976 | Olanzapine                                                                         |
| 20077 | Codeine Phosphate/Diphenhydramine<br>Hydrochloride/Caffeine/Paracetamol            |
| 20256 | Codeine Phosphate/Doxylamine<br>Succinate/Caffeine/Paracetamol                     |
| 20853 | Codeine Phosphate/Diphenhydramine<br>Hydrochloride/Caffeine/Paracetamol            |
| 21090 | Diphenhydramine hydrochloride                                                      |
| 21199 | Clozapine                                                                          |
| 21270 | Racemic camphor/Diphenhydramine hydrochloride/Zinc<br>oxide                        |
| 21359 | Promethazine hydrochloride                                                         |
| 21672 | Diphenhydramine hydrochloride                                                      |
| 21709 | Quetiapine fumarate                                                                |
| 21746 | Codeine Phosphate/Diphenhydramine<br>Hydrochloride/Caffeine/Paracetamol            |
| 21914 | Oxybutynin hydrochloride                                                           |
| 21964 | Olanzapine                                                                         |
| 21993 | Oxybutynin hydrochloride                                                           |
| 22133 | Diphenhydramine hydrochloride/Dextromethorphan<br>hydrobromide                     |
| 22236 | Promethazine Hydrochloride/Paracetamol                                             |
| 22267 | Promethazine Hydrochloride/Pholcodine                                              |
| 22425 | Diphenhydramine hydrochloride/Levomethol                                           |
| 22516 | Diphenhydramine Hydrochloride/Camphor/Calamine                                     |

---

---

|       |                                                                                                                      |
|-------|----------------------------------------------------------------------------------------------------------------------|
| 22571 | Morphine Sulphate/Atropine Sulphate                                                                                  |
| 22606 | Chlorpromazine hydrochloride                                                                                         |
| 22628 | Atropine Sulphate                                                                                                    |
| 22971 | Diphenhydramine Hydrochloride/Zinc Oxide/Racemic<br>Camphor                                                          |
| 23044 | Diphenhydramine hydrochloride                                                                                        |
| 23052 | Promethazine Hydrochloride/Paracetamol                                                                               |
| 23107 | Paracetamol/Promethazine hydrochloride/Dextromethorphan<br>hydrobromide                                              |
| 23413 | Ammonium chloride/Diphenhydramine hydrochloride                                                                      |
| 23431 | Olanzapine                                                                                                           |
| 23580 | Codeine Phosphate/Diphenhydramine<br>Hydrochloride/Ascorbic Acid/Phenylephrine<br>Hydrochloride/Caffeine/Paracetamol |
| 23591 | Diphenhydramine Hydrochloride                                                                                        |
| 24187 | Codeine Phosphate/Diphenhydramine<br>Hydrochloride/Ascorbic Acid/Phenylephrine<br>Hydrochloride/Caffeine/Paracetamol |
| 24283 | Paracetamol/Diphenhydramine hydrochloride                                                                            |
| 24445 | Promethazine Hydrochloride/Paracetamol                                                                               |
| 24480 | Paracetamol/Promethazine hydrochloride/Dextromethorphan<br>hydrobromide                                              |
| 24601 | Diphenhydramine hydrochloride/Pseudoephedrine<br>hydrochloride                                                       |
| 24890 | Trifluoperazine Hydrochloride/Tranlycypromine Sulphate                                                               |
| 24934 | Alcohol/Pseudoephedrine Hydrochloride/Brompheniramine<br>Maleate/Guaifenesin                                         |
| 25237 | Diphenhydramine Hydrochloride/Ammonium Chloride                                                                      |
| 25653 | Chlorpromazine hydrochloride                                                                                         |
| 25909 | Perphenazine                                                                                                         |
| 26090 | Atropine Sulphate                                                                                                    |
| 26223 | Oxybutynin hydrochloride                                                                                             |
| 26250 | Oxybutynin hydrochloride                                                                                             |
| 26291 | Codeine Phosphate/Diphenhydramine<br>Hydrochloride/Ascorbic Acid/Phenylephrine<br>Hydrochloride/Caffeine/Paracetamol |
| 26294 | Diphenhydramine Hydrochloride/Phenylpropanolamine<br>Hydrochloride/Paracetamol                                       |
| 26718 | Oxybutynin hydrochloride                                                                                             |
| 26868 | Orphenadrine Hydrochloride                                                                                           |
| 26954 | Trihexyphenidyl hydrochloride                                                                                        |
| 27118 | Diphenhydramine hydrochloride                                                                                        |
| 27337 | Pseudoephedrine Hydrochloride/Diphenhydramine<br>Hydrochloride/Paracetamol                                           |
| 27804 | Pseudoephedrine Hydrochloride/Diphenhydramine<br>Hydrochloride/Paracetamol                                           |

---



---

|       |                                                                                                  |
|-------|--------------------------------------------------------------------------------------------------|
| 27988 | Promethazine Hydrochloride/Pholcodine                                                            |
| 28357 | Propiverine hydrochloride                                                                        |
| 28669 | Propiverine hydrochloride                                                                        |
| 28729 | Orphenadrine Hydrochloride                                                                       |
| 28756 | Alcohol/Codeine Phosphate/Pseudoephedrine<br>Hydrochloride/Brompheniramine Maleate               |
| 28792 | Promethazine Hydrochloride/Paracetamol                                                           |
| 28862 | Chlorpromazine hydrochloride                                                                     |
| 28916 | Atropine Sulphate                                                                                |
| 28937 | Diphenhydramine Hydrochloride/Phenylephrine<br>Hydrochloride/Paracetamol                         |
| 29054 | Aspirin/Methocarbamol                                                                            |
| 29341 | Diphenhydramine hydrochloride/Dextromethorphan<br>hydrobromide                                   |
| 29425 | Benzatropine mesilate                                                                            |
| 29540 | Olanzapine                                                                                       |
| 29732 | Promethazine Hydrochloride/Pholcodine                                                            |
| 29836 | Orphenadrine hydrochloride                                                                       |
| 29947 | Trihexyphenidyl hydrochloride                                                                    |
| 29948 | Trifluoperazine hydrochloride                                                                    |
| 30262 | Trihexyphenidyl hydrochloride                                                                    |
| 30388 | Diphenhydramine Hydrochloride                                                                    |
| 30487 | Clozapine                                                                                        |
| 30590 | Promethazine Hydrochloride/Paracetamol                                                           |
| 30776 | Oxybutynin hydrochloride                                                                         |
| 30787 | Diphenoxylate Hydrochloride/Atropine Sulphate                                                    |
| 30839 | Alcohol/Brompheniramine Maleate/Phenylephrine<br>Hydrochloride/Phenylpropanolamine Hydrochloride |
| 30992 | Diphenhydramine hydrochloride                                                                    |
| 30996 | Ammonium chloride/Diphenhydramine hydrochloride                                                  |
| 31171 | Chlorpromazine hydrochloride                                                                     |
| 31172 | Chlorpromazine hydrochloride                                                                     |
| 31175 | Chlorpromazine hydrochloride                                                                     |
| 31184 | Chlorpromazine hydrochloride                                                                     |
| 31222 | Oxybutynin hydrochloride                                                                         |
| 31298 | Diphenoxylate hydrochloride/Atropine sulfate                                                     |
| 31320 | Atropine sulfate                                                                                 |
| 31409 | Clemastine hydrogen fumarate                                                                     |
| 31615 | Diphenhydramine Hydrochloride/Sodium Citrate                                                     |
| 31803 | Atropine sulfate                                                                                 |
| 31848 | Diphenhydramine hydrochloride/Levomenthol                                                        |
| 31889 | Promethazine hydrochloride                                                                       |
| 32246 | Diphenhydramine hydrochloride/Levomenthol                                                        |
| 32519 | Paracetamol/Doxylamine succinate/Caffeine/Codeine<br>phosphate                                   |

---

---

|       |                                                                                                   |
|-------|---------------------------------------------------------------------------------------------------|
| 32891 | Paracetamol/Doxylamine succinate/Caffeine/Codeine phosphate                                       |
| 32899 | Paroxetine hydrochloride                                                                          |
| 32928 | Atropine sulfate                                                                                  |
| 32942 | Diphenhydramine Hydrochloride/Phenylephrine Hydrochloride/Paracetamol                             |
| 33061 | Pseudoephedrine Hydrochloride/Diphenhydramine Hydrochloride/Dextromethorphan Hydrobromide/Menthol |
| 33230 | Promethazine Hydrochloride/Paracetamol                                                            |
| 33285 | Diphenhydramine hydrochloride/Levomethol                                                          |
| 33442 | Atropine Sulphate                                                                                 |
| 33576 | Diphenhydramine Hydrochloride/Menthol/Sodium Citrate                                              |
| 33642 | Dextromethorphan hydrobromide/Doxylamine succinate/Paracetamol/Pseudoephedrine hydrochloride      |
| 33680 | Trihexyphenidyl hydrochloride                                                                     |
| 33883 | Olanzapine                                                                                        |
| 33954 | Pethidine Hydrochloride/Promethazine Hydrochloride                                                |
| 33978 | Paroxetine hydrochloride                                                                          |
| 34351 | Paroxetine hydrochloride                                                                          |
| 34419 | Paroxetine hydrochloride                                                                          |
| 34458 | Oxybutynin hydrochloride                                                                          |
| 34529 | Oxybutynin hydrochloride                                                                          |
| 34530 | Oxybutynin hydrochloride                                                                          |
| 34587 | Paroxetine hydrochloride                                                                          |
| 34630 | Chlorpromazine hydrochloride                                                                      |
| 34668 | Chlorpromazine hydrochloride                                                                      |
| 34674 | Oxybutynin hydrochloride                                                                          |
| 34693 | Chlorpromazine hydrochloride                                                                      |
| 34736 | Chlorpromazine hydrochloride                                                                      |
| 34780 | Oxybutynin hydrochloride                                                                          |
| 34902 | Thioridazine hydrochloride                                                                        |
| 34905 | Thioridazine hydrochloride                                                                        |
| 34982 | Diphenoxylate hydrochloride/Atropine sulfate                                                      |
| 35021 | Paroxetine hydrochloride                                                                          |
| 35112 | Paroxetine hydrochloride                                                                          |
| 35121 | Darifenacin hydrobromide                                                                          |
| 35140 | Darifenacin hydrobromide                                                                          |
| 35233 | Diphenhydramine Hydrochloride/Ammonium Chloride                                                   |
| 35351 | Cinnarizine/Dimenhydrinate                                                                        |
| 35437 | Promethazine hydrochloride                                                                        |
| 35442 | Cinnarizine/Dimenhydrinate                                                                        |
| 35787 | Thioridazine hydrochloride                                                                        |
| 35791 | Oxybutynin Hydrochloride                                                                          |
| 35838 | Darifenacin hydrobromide                                                                          |
| 35846 | Promethazine hydrochloride                                                                        |
| 35857 | Promethazine hydrochloride/Pholcodine                                                             |

---

---

|       |                                                                         |
|-------|-------------------------------------------------------------------------|
| 35908 | Atropine sulfate                                                        |
| 35929 | Chlorpromazine hydrochloride                                            |
| 36152 | Caffeine/Diphenhydramine hydrochloride/Codeine phosphate/Paracetamol    |
| 36160 | Darifenacin hydrobromide                                                |
| 36163 | Olanzapine                                                              |
| 36516 | Trihexyphenidyl Hydrochloride                                           |
| 36906 | Atropine sulfate                                                        |
| 36929 | Paracetamol/Diphenhydramine hydrochloride                               |
| 37348 | Codeine Phosphate/Doxylamine Succinate/Caffeine/Paracetamol             |
| 37705 | Chlorpromazine Hydrochloride                                            |
| 37871 | Chlorpromazine hydrochloride                                            |
| 38104 | Diphenhydramine hydrochloride                                           |
| 38197 | Fesoterodine fumarate                                                   |
| 38235 | Fesoterodine fumarate                                                   |
| 38252 | Flavoxate hydrochloride                                                 |
| 38291 | Fesoterodine fumarate                                                   |
| 38299 | Paracetamol/Diphenhydramine hydrochloride                               |
| 38467 | Fesoterodine fumarate                                                   |
| 38806 | Diphenhydramine Hydrochloride/Ammonium Chloride                         |
| 38816 | Tolterodine tartrate                                                    |
| 38840 | Quetiapine fumarate                                                     |
| 38885 | Quetiapine fumarate                                                     |
| 38906 | Quetiapine fumarate                                                     |
| 38912 | Quetiapine fumarate                                                     |
| 38913 | Quetiapine fumarate                                                     |
| 38914 | Quetiapine fumarate                                                     |
| 38937 | Quetiapine fumarate                                                     |
| 39237 | Quetiapine fumarate                                                     |
| 40096 | Oxybutynin hydrochloride                                                |
| 40162 | Trifluoperazine hydrochloride                                           |
| 40165 | Paroxetine hydrochloride                                                |
| 40326 | Dimenhydrinate/Cinnarizine                                              |
| 40377 | Benzatropine mesilate                                                   |
| 40470 | Diphenhydramine hydrochloride                                           |
| 40472 | Hydroxyzine hydrochloride                                               |
| 40510 | Hydroxyzine hydrochloride                                               |
| 40586 | Clozapine                                                               |
| 40587 | Clozapine                                                               |
| 40624 | Diphenhydramine hydrochloride/Paracetamol/Pseudoephedrine hydrochloride |
| 40779 | Quetiapine fumarate                                                     |
| 40797 | Trospium chloride                                                       |
| 40892 | Paroxetine hydrochloride                                                |
| 40932 | Quetiapine fumarate                                                     |

---

---

|       |                                                                            |
|-------|----------------------------------------------------------------------------|
| 40962 | Trospium chloride                                                          |
| 41070 | Clozapine                                                                  |
| 41428 | Clozapine                                                                  |
| 41429 | Trospium chloride                                                          |
| 41580 | Oxybutynin hydrochloride                                                   |
| 41643 | Oxybutynin hydrochloride                                                   |
| 41645 | Chlorpromazine Hydrochloride                                               |
| 41649 | Oxybutynin hydrochloride                                                   |
| 41663 | Trifluoperazine hydrochloride                                              |
| 41829 | Trihexyphenidyl hydrochloride                                              |
| 42064 | Pseudoephedrine Hydrochloride/Brompheniramine Maleate                      |
| 42242 | Clozapine                                                                  |
| 42522 | Atropine sulfate                                                           |
| 42735 | Trihexyphenidyl hydrochloride                                              |
| 42816 | Thioridazine Hydrochloride                                                 |
| 43073 | Propantheline bromide                                                      |
| 43366 | Diphenhydramine hydrochloride                                              |
| 43419 | Trihexyphenidyl hydrochloride                                              |
| 43424 | Thioridazine hydrochloride                                                 |
| 43446 | Hydroxyzine Hydrochloride                                                  |
| 43551 | Orphenadrine hydrochloride                                                 |
| 43559 | Oxybutynin hydrochloride                                                   |
| 43914 | Olanzapine embonate monohydrate                                            |
| 44024 | Quetiapine fumarate                                                        |
| 44186 | Chlorpromazine hydrochloride                                               |
| 44326 | Quetiapine fumarate                                                        |
| 44984 | Pseudoephedrine Hydrochloride/Diphenhydramine<br>Hydrochloride/Paracetamol |
| 45258 | Orphenadrine hydrochloride                                                 |
| 45281 | Chlorpromazine hydrochloride                                               |
| 45444 | Clozapine                                                                  |
| 45469 | Diphenhydramine<br>hydrochloride/Paracetamol/Pseudoephedrine hydrochloride |
| 45839 | Quetiapine fumarate                                                        |
| 45860 | Thioridazine hydrochloride                                                 |
| 45953 | Olanzapine                                                                 |
| 46177 | Oxybutynin hydrochloride                                                   |
| 46422 | Olanzapine embonate monohydrate                                            |
| 46565 | Guaiifenesin/Levomethol/Diphenhydramine hydrochloride                      |
| 46764 | Quetiapine fumarate                                                        |
| 46871 | Quetiapine fumarate                                                        |
| 46960 | Chlorpromazine hydrochloride                                               |
| 47049 | Olanzapine                                                                 |
| 47055 | Olanzapine                                                                 |
| 47056 | Promethazine hydrochloride                                                 |
| 47063 | Olanzapine                                                                 |

---

---

|       |                                                                                                                                              |
|-------|----------------------------------------------------------------------------------------------------------------------------------------------|
| 47083 | Olanzapine                                                                                                                                   |
| 47093 | Olanzapine                                                                                                                                   |
| 47098 | Olanzapine                                                                                                                                   |
| 47103 | Olanzapine                                                                                                                                   |
| 47152 | Olanzapine                                                                                                                                   |
| 47200 | Paracetamol/Doxylamine succinate/Caffeine/Codeine phosphate                                                                                  |
| 47233 | Clozapine                                                                                                                                    |
| 47256 | Olanzapine                                                                                                                                   |
| 47302 | Clozapine                                                                                                                                    |
| 47304 | Olanzapine                                                                                                                                   |
| 47361 | Thioridazine Hydrochloride                                                                                                                   |
| 47394 | Olanzapine                                                                                                                                   |
| 47498 | Olanzapine                                                                                                                                   |
| 47607 | Atropine sulfate/Magnesium trisilicate/Magnesium carbonate/Calcium carbonate/Aluminium hydroxide gel dried/Sodium bicarbonate/Peppermint oil |
| 47881 | Thioridazine hydrochloride                                                                                                                   |
| 48516 | Tolterodine tartrate                                                                                                                         |
| 49365 | Oxybutynin hydrochloride                                                                                                                     |
| 49414 | Tolterodine tartrate                                                                                                                         |
| 49696 | Quetiapine fumarate                                                                                                                          |
| 49968 | Promethazine hydrochloride                                                                                                                   |
| 50123 | Methocarbamol                                                                                                                                |
| 50126 | Tolterodine tartrate                                                                                                                         |
| 50214 | Olanzapine                                                                                                                                   |
| 50262 | Oxybutynin hydrochloride                                                                                                                     |
| 50505 | Diphenhydramine hydrochloride                                                                                                                |
| 50596 | Fesoterodine fumarate                                                                                                                        |
| 50764 | Solifenacin succinate                                                                                                                        |
| 50879 | Guaiifenesin/Levomethol/Diphenhydramine hydrochloride                                                                                        |
| 51025 | Tolterodine tartrate                                                                                                                         |
| 51178 | Quetiapine fumarate                                                                                                                          |
| 51438 | Dimenhydrinate                                                                                                                               |
| 51868 | Tolterodine tartrate                                                                                                                         |
| 51922 | Tolterodine tartrate                                                                                                                         |
| 51929 | Tolterodine tartrate                                                                                                                         |
| 52001 | Olanzapine                                                                                                                                   |
| 52266 | Trospium chloride                                                                                                                            |
| 52401 | Tolterodine tartrate                                                                                                                         |
| 52421 | Tolterodine tartrate                                                                                                                         |
| 52422 | Trospium chloride                                                                                                                            |
| 52491 | Atropine sulfate                                                                                                                             |
| 52667 | Trospium chloride                                                                                                                            |
| 52753 | Trospium chloride                                                                                                                            |
| 52940 | Quetiapine fumarate                                                                                                                          |

---

---

|       |                                                                         |
|-------|-------------------------------------------------------------------------|
| 53533 | Oxybutynin hydrochloride                                                |
| 53552 | Quetiapine fumarate                                                     |
| 53556 | Olanzapine                                                              |
| 53632 | Atropine sulfate                                                        |
| 53694 | Oxybutynin hydrochloride                                                |
| 53848 | Olanzapine                                                              |
| 53954 | Tolterodine tartrate                                                    |
| 54483 | Quetiapine fumarate                                                     |
| 54653 | Oxybutynin hydrochloride                                                |
| 54656 | Atropine Sulphate                                                       |
| 55011 | Chlorpromazine hydrochloride                                            |
| 55012 | Chlorpromazine hydrochloride                                            |
| 55023 | Paroxetine hydrochloride                                                |
| 55108 | Tolterodine tartrate                                                    |
| 55268 | Olanzapine embonate monohydrate                                         |
| 55382 | Trifluoperazine hydrochloride                                           |
| 55537 | Paroxetine hydrochloride                                                |
| 55622 | Olanzapine                                                              |
| 55667 | Olanzapine                                                              |
| 55688 | Tolterodine tartrate                                                    |
| 55838 | Promethazine hydrochloride                                              |
| 55870 | Quetiapine Fumarate                                                     |
| 55909 | Trihexyphenidyl hydrochloride                                           |
| 55927 | Trihexyphenidyl hydrochloride                                           |
| 55934 | Tolterodine tartrate                                                    |
| 56072 | Olanzapine                                                              |
| 56143 | Olanzapine                                                              |
| 56193 | Olanzapine                                                              |
| 56215 | Quetiapine fumarate                                                     |
| 56265 | Olanzapine                                                              |
| 56517 | Trospium chloride                                                       |
| 56577 | Olanzapine                                                              |
| 56603 | Tolterodine tartrate                                                    |
| 56647 | Quetiapine fumarate                                                     |
| 56862 | Chlorpromazine hydrochloride                                            |
| 57031 | Trihexyphenidyl hydrochloride                                           |
| 57034 | Quetiapine fumarate                                                     |
| 57067 | Atropine sulfate                                                        |
| 57092 | Dextromethorphan hydrobromide/Promethazine<br>hydrochloride/Paracetamol |
| 57160 | Olanzapine                                                              |
| 57270 | Olanzapine                                                              |
| 57300 | Tolterodine tartrate                                                    |
| 57408 | Trihexyphenidyl hydrochloride                                           |
| 57412 | Quetiapine fumarate                                                     |
| 57413 | Oxybutynin hydrochloride                                                |

---

---

|       |                                                                      |
|-------|----------------------------------------------------------------------|
| 57550 | Chlorpromazine hydrochloride                                         |
| 57605 | Trifluoperazine hydrochloride                                        |
| 57612 | Quetiapine fumarate                                                  |
| 57613 | Quetiapine fumarate                                                  |
| 57616 | Olanzapine                                                           |
| 57691 | Oxybutynin hydrochloride                                             |
| 57712 | Atropine sulfate                                                     |
| 58067 | Quetiapine fumarate                                                  |
| 58147 | Olanzapine                                                           |
| 58425 | Quetiapine fumarate                                                  |
| 58492 | Chlorpromazine hydrochloride                                         |
| 58702 | Chlorpromazine hydrochloride                                         |
| 58703 | Chlorpromazine hydrochloride                                         |
| 58821 | Quetiapine fumarate                                                  |
| 58854 | Olanzapine                                                           |
| 58935 | Quetiapine fumarate                                                  |
| 58936 | Quetiapine fumarate                                                  |
| 59143 | Olanzapine                                                           |
| 59215 | Quetiapine fumarate                                                  |
| 59288 | Paroxetine hydrochloride                                             |
| 59462 | Solifenacin succinate/Tamsulosin hydrochloride                       |
| 59509 | Diphenhydramine hydrochloride/Zinc oxide/Racemic camphor             |
| 59641 | Solifenacin succinate                                                |
| 59676 | Solifenacin succinate/Tamsulosin hydrochloride                       |
| 59693 | Tropium chloride                                                     |
| 59801 | Paracetamol/Promethazine hydrochloride/Dextromethorphan hydrobromide |
| 60090 | Tolterodine tartrate                                                 |
| 60842 | Quetiapine fumarate                                                  |
| 60908 | Chlorpromazine hydrochloride                                         |
| 61103 | Olanzapine                                                           |
| 61153 | Chlorpromazine hydrochloride                                         |
| 61466 | Tolterodine tartrate                                                 |
| 61575 | Quetiapine fumarate                                                  |
| 61746 | Quetiapine fumarate                                                  |
| 61747 | Quetiapine fumarate                                                  |
| 61748 | Quetiapine fumarate                                                  |
| 61956 | Tolterodine tartrate                                                 |
| 62403 | Propiverine hydrochloride                                            |
| 62478 | Trihexyphenidyl hydrochloride                                        |
| 62531 | Quetiapine fumarate                                                  |
| 62590 | Promethazine hydrochloride                                           |
| 62634 | Tolterodine Tartrate                                                 |
| 62888 | Diphenhydramine hydrochloride                                        |
| 62943 | Quetiapine fumarate                                                  |

---

---

|       |                                                                            |
|-------|----------------------------------------------------------------------------|
| 62980 | Promethazine hydrochloride                                                 |
| 63049 | Quetiapine fumarate                                                        |
| 63087 | Quetiapine fumarate                                                        |
| 63133 | Quetiapine fumarate                                                        |
| 63155 | Olanzapine                                                                 |
| 63329 | Tolterodine tartrate                                                       |
| 63351 | Quetiapine fumarate                                                        |
| 63359 | Quetiapine fumarate                                                        |
| 63363 | Quetiapine fumarate                                                        |
| 63364 | Quetiapine fumarate                                                        |
| 63389 | Quetiapine fumarate                                                        |
| 63599 | Diphenhydramine hydrochloride/Menthol/Dextromethorphan hydrobromide        |
| 63615 | Olanzapine                                                                 |
| 63669 | Pseudoephedrine Hydrochloride/Brompheniramine Maleate                      |
| 63797 | Quetiapine fumarate                                                        |
| 63818 | Quetiapine fumarate                                                        |
| 63828 | Propiverine hydrochloride                                                  |
| 63833 | Olanzapine                                                                 |
| 63925 | Quetiapine fumarate                                                        |
| 63983 | Oxybutynin hydrochloride                                                   |
| 63984 | Oxybutynin hydrochloride                                                   |
| 64056 | Oxybutynin hydrochloride                                                   |
| 64216 | Trifluoperazine hydrochloride                                              |
| 64257 | Tolterodine tartrate                                                       |
| 64323 | Atropine sulfate                                                           |
| 64473 | Solifenacin succinate                                                      |
| 64484 | Quetiapine fumarate                                                        |
| 64531 | Trospium chloride                                                          |
| 64639 | Quetiapine fumarate                                                        |
| 64778 | Quetiapine fumarate                                                        |
| 64785 | Paroxetine hydrochloride                                                   |
| 64932 | Paracetamol/Promethazine hydrochloride/Dextromethorphan hydrobromide       |
| 64934 | Oxybutynin hydrochloride                                                   |
| 64955 | Tolterodine tartrate                                                       |
| 65174 | Quetiapine fumarate                                                        |
| 65246 | Chlorpromazine hydrochloride                                               |
| 65300 | Oxybutynin hydrochloride                                                   |
| 65650 | Diphenhydramine hydrochloride/Paracetamol/Caffeine/Ephedrine hydrochloride |
| 65707 | Olanzapine                                                                 |
| 65938 | Quetiapine fumarate                                                        |
| 65944 | Olanzapine                                                                 |
| 66255 | Quetiapine fumarate                                                        |



|       |                                                                         |
|-------|-------------------------------------------------------------------------|
| 66292 | Paroxetine hydrochloride                                                |
| 66326 | Trihexyphenidyl hydrochloride                                           |
| 66427 | Quetiapine fumarate                                                     |
| 66630 | Diphenhydramine hydrochloride/Ammonium chloride                         |
| 66668 | Oxybutynin hydrochloride                                                |
| 66965 | Hydroxyzine hydrochloride                                               |
| 67203 | Hydroxyzine hydrochloride                                               |
| 67244 | Brompheniramine maleate                                                 |
| 67247 | Chlorpromazine hydrochloride                                            |
| 67259 | Paroxetine hydrochloride                                                |
| 67334 | Quetiapine fumarate                                                     |
| 67747 | Chlorpromazine hydrochloride                                            |
| 67765 | Thioridazine hydrochloride                                              |
| 67805 | Trifluoperazine hydrochloride                                           |
| 67820 | Chlorpromazine hydrochloride                                            |
| 67873 | Hydroxyzine hydrochloride                                               |
| 67932 | Trospium chloride                                                       |
| 68074 | Diphenoxylate hydrochloride/Atropine sulfate                            |
| 68325 | Paroxetine hydrochloride                                                |
| 68346 | Olanzapine                                                              |
| 68347 | Olanzapine                                                              |
| 68375 | Quetiapine fumarate                                                     |
| 68539 | Propantheline bromide                                                   |
| 68562 | Paracetamol/Codeine phosphate/Doxylamine succinate/Caffeine             |
| 68714 | Diphenhydramine hydrochloride/Paracetamol/Pseudoephedrine hydrochloride |
| 69121 | Olanzapine embonate monohydrate                                         |
| 69169 | Atropine Sulphate                                                       |
| 69261 | Orphenadrine hydrochloride                                              |
| 69387 | Atropine sulfate                                                        |
| 69469 | Tolterodine tartrate                                                    |
| 69511 | Olanzapine                                                              |
| 69544 | Quetiapine fumarate                                                     |
| 69585 | Trihexyphenidyl hydrochloride                                           |
| 69635 | Quetiapine fumarate                                                     |
| 69637 | Quetiapine fumarate                                                     |
| 69674 | Olanzapine                                                              |
| 69787 | Quetiapine fumarate                                                     |
| 69816 | Hydroxyzine hydrochloride                                               |
| 69836 | Quetiapine fumarate                                                     |
| 70192 | Quetiapine fumarate                                                     |
| 70219 | Olanzapine                                                              |
| 70312 | Quetiapine fumarate                                                     |
| 70313 | Quetiapine fumarate                                                     |
| 70367 | Olanzapine                                                              |

|       |                                        |
|-------|----------------------------------------|
| 70415 | Olanzapine                             |
| 70493 | Atropine sulfate                       |
| 70542 | Olanzapine                             |
| 70640 | Olanzapine                             |
| 70684 | Quetiapine fumarate                    |
| 70739 | Tolterodine tartrate                   |
| 70837 | Atropine sulfate                       |
| 70843 | Diphenhydramine Hydrochloride/Calamine |
| 70907 | Quetiapine fumarate                    |
| 70929 | Propantheline bromide                  |
| 70992 | Quetiapine fumarate                    |
| 71022 | Oxybutynin hydrochloride               |
| 71230 | Tolterodine tartrate                   |
| 71359 | Flavoxate hydrochloride                |
| 71367 | Olanzapine                             |
| 71378 | Oxybutynin hydrochloride               |
| 71387 | Trifluoperazine hydrochloride          |
| 71421 | Thioridazine                           |
| 71478 | Olanzapine                             |
| 71593 | Diphenhydramine hydrochloride          |
| 71670 | Olanzapine                             |
| 71734 | Olanzapine embonate monohydrate        |
| 72077 | Oxybutynin hydrochloride               |
| 72141 | Solifenacin succinate                  |
| 72468 | Tolterodine tartrate                   |
| 72577 | Olanzapine                             |
| 69261 | Orphenadrine hydrochloride             |
| 69387 | Atropine sulfate                       |
| 69469 | Tolterodine tartrate                   |
| 69511 | Olanzapine                             |
| 69544 | Quetiapine fumarate                    |
| 69585 | Trihexyphenidyl hydrochloride          |
| 69635 | Quetiapine fumarate                    |
| 69637 | Quetiapine fumarate                    |
| 69674 | Olanzapine                             |
| 69787 | Quetiapine fumarate                    |
| 69816 | Hydroxyzine hydrochloride              |
| 69836 | Quetiapine fumarate                    |
| 70192 | Quetiapine fumarate                    |
| 70219 | Olanzapine                             |
| 70312 | Quetiapine fumarate                    |
| 70313 | Quetiapine fumarate                    |
| 70367 | Olanzapine                             |
| 70415 | Olanzapine                             |
| 70493 | Atropine sulfate                       |
| 70542 | Olanzapine                             |

|       |                                        |
|-------|----------------------------------------|
| 70640 | Olanzapine                             |
| 70684 | Quetiapine fumarate                    |
| 70739 | Tolterodine tartrate                   |
| 70837 | Atropine sulfate                       |
| 70843 | Diphenhydramine Hydrochloride/Calamine |
| 70907 | Quetiapine fumarate                    |
| 70929 | Propantheline bromide                  |
| 70992 | Quetiapine fumarate                    |
| 71022 | Oxybutynin hydrochloride               |
| 71230 | Tolterodine tartrate                   |
| 71359 | Flavoxate hydrochloride                |
| 71367 | Olanzapine                             |
| 71378 | Oxybutynin hydrochloride               |
| 71387 | Trifluoperazine hydrochloride          |
| 71421 | Thioridazine                           |
| 71478 | Olanzapine                             |
| 71593 | Diphenhydramine hydrochloride          |
| 71670 | Olanzapine                             |
| 71734 | Olanzapine embonate monohydrate        |
| 72077 | Oxybutynin hydrochloride               |
| 72141 | Solifenacin succinate                  |
| 72468 | Tolterodine tartrate                   |
| 72577 | Olanzapine                             |
| 70219 | Olanzapine                             |
| 70312 | Quetiapine fumarate                    |
| 70313 | Quetiapine fumarate                    |
| 70367 | Olanzapine                             |
| 70415 | Olanzapine                             |
| 70493 | Atropine sulfate                       |
| 70542 | Olanzapine                             |
| 70640 | Olanzapine                             |
| 70684 | Quetiapine fumarate                    |
| 70739 | Tolterodine tartrate                   |
| 70837 | Atropine sulfate                       |
| 70843 | Diphenhydramine Hydrochloride/Calamine |
| 70907 | Quetiapine fumarate                    |
| 70929 | Propantheline bromide                  |
| 70992 | Quetiapine fumarate                    |
| 71022 | Oxybutynin hydrochloride               |
| 71230 | Tolterodine tartrate                   |
| 71359 | Flavoxate hydrochloride                |
| 71367 | Olanzapine                             |
| 71378 | Oxybutynin hydrochloride               |
| 71387 | Trifluoperazine hydrochloride          |
| 71421 | Thioridazine                           |
| 71478 | Olanzapine                             |

---

|       |                                 |
|-------|---------------------------------|
| 71593 | Diphenhydramine hydrochloride   |
| 71670 | Olanzapine                      |
| 71734 | Olanzapine embonate monohydrate |
| 72077 | Oxybutynin hydrochloride        |
| 72141 | Solifenacin succinate           |
| 72468 | Tolterodine tartrate            |
| 72577 | Olanzapine                      |

---

**Supplementary Table 5** Medcodes and Read codes for death<sup>a</sup>

| Medcode | Read code | Read term                                       |
|---------|-----------|-------------------------------------------------|
| 1127    | 22J..13   | Died                                            |
| 1413    | L264.00   | Intrauterine death                              |
| 1448    | 22J..14   | Patient died                                    |
| 1868    | 8HG..00   | Died in hospital                                |
| 2240    | Q4z..12   | Neonatal death                                  |
| 4302    | R210000   | [D]Cot death                                    |
| 6576    | 22J..00   | O/E - dead                                      |
| 6811    | R21..00   | [D]Sudden death, cause unknown                  |
| 6855    | 9491      | Patient died at home                            |
| 6897    | 9495      | Patient died in hospital                        |
| 6991    | 9493      | Patient died in nursing home                    |
| 7847    | 22J..12   | Death                                           |
| 7962    | R213100   | [D]Found dead                                   |
| 8706    | 94B..00   | Cause of death                                  |
| 9059    | 8HG..11   | Death in hospital                               |
| 11374   | R2...12   | [D]Mortality, cause unsure                      |
| 13549   | 94...00   | Death administration                            |
| 13550   | 947Z.00   | SD17/18 cause of death NOS                      |
| 13551   | 941..00   | Death certificate form Med A                    |
| 13552   | 94A..11   | Referral to coroner                             |
| 13553   | 94Z..00   | Death administration NOS                        |
| 13554   | 9482      | Crem. form part B completed                     |
| 13555   | 949..12   | Deceased - place patient died                   |
| 13556   | 948..00   | Cremation certification                         |
| 13581   | R210.00   | [D]Sudden infant death syndrome                 |
| 15337   | R213.00   | [D]Unattended death                             |
| 15858   | 949..13   | Died - place patient died                       |
| 15986   | R211.00   | [D]Instantaneous death                          |
| 16934   | 943..00   | Report for Coroner                              |
| 17680   | 94A..00   | Unexpected death-Coroner told                   |
| 18169   | ZV68011   | [V]Issue of death certificate                   |
| 18447   | 9234      | FP22-death                                      |
| 19317   | 8CN1.00   | Preferred place of death discussed with patient |
| 19628   | 949..11   | Dead - place patient died                       |
| 20320   | Q210.00   | Fetal death due to prelabour anoxia             |
| 20540   | 949..00   | Patient died - to record place                  |
| 20659   | 944..00   | Coroner's post-mortem report                    |
| 20902   | 94C..00   | Post mortem report                              |
| 21195   | G575100   | Sudden cardiac death, so described              |
| 23073   | 9412      | Death cert. Med A signed                        |
| 23074   | 94...11   | Administration after pat. died                  |
| 23075   | 22J4.00   | O/E - dead - sudden death                       |
| 23076   | 94Z5.00   | Preferred place of death: nursing home          |

|       |         |                                                           |
|-------|---------|-----------------------------------------------------------|
| 23077 | 22J2.00 | O/E - dead - expected                                     |
| 23830 | R21z.00 | [D]Sudden death, cause unknown NOS                        |
| 26679 | Q4z..11 | Infant death                                              |
| 26691 | 6235    | A/N care: H/O perinatal death                             |
| 26812 | 9494    | Patient died in resid.inst.NOS                            |
| 27362 | 9443    | Coroner's PM report received                              |
| 27475 | 13M3.00 | Sudden infant death                                       |
| 27505 | 949Z.00 | Patient died in place NOS                                 |
| 27899 | 2329    | O/E - death rattle                                        |
| 28341 | Q48y600 | Early neonatal death                                      |
| 28378 | 949A.00 | Patient died in hospice                                   |
| 28645 | 9453    | Receiv hosp death disch letter                            |
| 28687 | 9497    | Patient died in publ.place NOS                            |
| 28689 | 94C0.00 | Post mortem report received                               |
| 28801 | 9451    | Death notif. from hospital                                |
| 28879 | 945..00 | Hospital death discharge notif                            |
| 28927 | 945Z.00 | Hospital death disch. NOS                                 |
| 30193 | Z1FC.00 | Preferences relating to death and dying                   |
| 30327 | 9498    | Dead on arrival at hospital                               |
| 30333 | 9496    | Patient died in street                                    |
| 30357 | 949B.00 | Patient died in community hospital                        |
| 30400 | 9499    | Found dead at accident site                               |
| 30500 | 22J3.00 | O/E - dead - unattended death                             |
| 30587 | 9483    | Crem. form part C arranged                                |
| 30609 | 94Z1.00 | Preferred place of death: home                            |
| 30690 | 94Z2.00 | Preferred place of death: hospice                         |
| 31121 | R212000 | [D]Death, not instantaneous cause unknown                 |
| 31267 | 9473    | SD17/18-no details, returned                              |
| 31685 | Q4z..14 | Perinatal death                                           |
| 32129 | R213000 | [D]Found after death, unknown cause of death              |
| 32631 | Z1FC200 | Preference for cremation                                  |
| 33135 | 068H.00 | Registrar-birth/death/marriage                            |
| 33249 | 94D..00 | Hospital notified of death                                |
| 35269 | 94Z0.00 | Preferred place of death                                  |
| 35520 | 22J1.00 | O/E - dead - unexpected                                   |
| 35909 | 949..14 | Place of death                                            |
| 36564 | Q48y700 | Late neonatal death                                       |
| 36789 | 9441    | Coroner's PM report awaited                               |
| 37230 | 4K92.00 | Coroner's post mortem exam.                               |
| 37831 | L264z00 | Intrauterine death NOS                                    |
| 38912 | 9431    | Coroner report - requested                                |
| 38948 | 8CN0.00 | Preferred place of death discussed with significant other |
| 39311 | 9492    | Patient died in part 3 accom.                             |
| 39580 | 946..00 | Death notif.- non.hosp source                             |
| 39581 | 9413    | Med A given to family                                     |
| 40882 | 94B..11 | Condition fatal-cause of death                            |

|       |         |                                                             |
|-------|---------|-------------------------------------------------------------|
| 41065 | 948Z.00 | Cremation certification NOS                                 |
| 42329 | 9484    | Crem. form part C completed                                 |
| 42330 | 9442    | Coroner's PM report requested                               |
| 43009 | 94E..00 | Date of death                                               |
| 43134 | 15A8.11 | H/O: perinatal death                                        |
| 43515 | 944Z.00 | Coroner's PM report NOS                                     |
| 44345 | L264100 | Intrauterine death - delivered                              |
| 44361 | 9481    | Patient for cremation                                       |
| 45731 | 9433    | Coroner report - paid for                                   |
| 45750 | Q4z..13 | Newborn death                                               |
| 46108 | 22JZ.00 | O/E - dead NOS                                              |
| 46304 | 9134.12 | Registration ghost - died                                   |
| 46349 | 22J6.00 | O/E - dead - suspicious death                               |
| 46448 | Q486.00 | Fetal death due to termination of pregnancy                 |
| 46606 | 9134.11 | Registration ghost - dead                                   |
| 46616 | T0y0.00 | Found dead on railway right-of-way unspecified              |
| 48288 | R210200 | [D]Nonspecific sudden infant death                          |
| 48437 | 9414    | Med A not signed-coroner case                               |
| 48438 | 941Z.00 | Death cert. Med A NOS                                       |
| 48491 | 236..12 | O/E - respiratory death                                     |
| 48986 | 947..00 | Cause of death clarif. SD17/18                              |
| 49051 | 9432    | Coroner report - sent off                                   |
| 49478 | L39X.00 | Obstetric death of unspecified cause                        |
| 49947 | 7L1M000 | Preoperative anaesthetic death                              |
| 50388 | 9411    | Death cert. Med A due                                       |
| 50586 | 13Q4.00 | Death grant                                                 |
| 51323 | R210z00 | [D]Sudden infant death syndrome NOS                         |
| 51482 | 9452    | Await hosp death disch letter                               |
| 51610 | 943Z.00 | Report for Coroner NOS                                      |
| 51674 | 63C3.00 | Cot death liability                                         |
| 52308 | Q211.00 | Fetal death due to labour anoxia                            |
| 52434 | 94Z4.00 | Preferred place of death: hospital                          |
| 54781 | 94Z3.00 | Preferred place of death: community hospital                |
| 56106 | R213z00 | [D]Unattended death NOS                                     |
| 56420 | L39B.00 | Death from sequelae of direct obstetric causes              |
| 56533 | L39A.00 | Death obst cse occur more 42 day less than one yr aft deliv |
| 57774 | 22J5.00 | O/E - dead - cot death                                      |
| 57786 | R210100 | [D]Crib death                                               |
| 58563 | 94F..00 | Unexpected death                                            |
| 58628 | Z22CC00 | Number of fetal deaths                                      |
| 59452 | L264000 | Intrauterine death unspecified                              |
| 61220 | R212.00 | [D]Death less than 24 hours from onset of illness           |
| 62863 | 948..11 | Stat B,C and F cremation certs                              |
| 65328 | RyuC.00 | [X]Ill-defined and unknown causes of mortality              |
| 66033 | 941..11 | Certificate - death                                         |
| 66176 | 22J..11 | O/E - dead - condition fatal                                |

|        |         |                                                           |
|--------|---------|-----------------------------------------------------------|
| 66966  | T0y0200 | Found dead on railway unspecified - pedestrian            |
| 67000  | 942..00 | Medical cert. of still-birth                              |
| 67519  | 949C.00 | Patient died in GP surgery                                |
| 68167  | T0y0z00 | Found dead on railway unspecified - unspecified person    |
| 68168  | 944..11 | Post-mortem report-police surg                            |
| 69254  | L264200 | Intrauterine death with antenatal problem                 |
| 71596  | 9471    | SD17/18 received-death clarif.                            |
| 72535  | 9472    | SD17/18 completed                                         |
| 73130  | RyuC100 | [X]Other sudden death, cause unknown                      |
| 73170  | 947..11 | SD17 - cause of death clarif                              |
| 73935  | Lyu7500 | [X]Obstetric death of unspecified cause                   |
| 93203  | R212z00 | [D]Death less than 24 hours from onset of illness NOS     |
| 93467  | 22J7.00 | Postneonatal death                                        |
| 94234  | R212100 | [D]Died, with no sign of disease                          |
| 94533  | RyuC000 | [X]Sudden infant death syndrome                           |
| 98237  | 9454    | Ask for hosp death disch lett.                            |
| 100171 | 9e01.00 | Notification to primary care OOHS of anticipated death    |
| 100468 | 94ZB.00 | Preferred place of death: discussed with family           |
| 100737 | T0y0300 | Found dead on railway unspecified - cyclist               |
| 100767 | 94Z6.00 | Preferred place of death: pt unable to express preference |
| 101078 | 949D.00 | Patient died in care home                                 |
| 101152 | 94ZC.00 | Preferred place of death: care home                       |
| 101701 | 94Z8.00 | Preferred place of death: patient undecided               |
| 102105 | 94C1.00 | Police surgeon postmortem report                          |
| 102422 | 9485    | Cremation form 4 completed                                |
| 102495 | 9486    | Cremation form 5 completed                                |
| 102557 | 2JL..00 | Imminent expected death                                   |
| 103051 | Z1FC500 | Preference to be present at time of death                 |
| 103360 | 94Z7.00 | Preferred place of death: discussion not appropriate      |
| 103754 | 94G..00 | Verification of expected death                            |
| 104115 | 94ZE.00 | Preferred place of death: residential home                |
| 104526 | 22J8.00 | Death - cause unknown                                     |
| 104566 | 94ZF.00 | Preferred place of death: usual place of residence        |
| 106038 | 94ZD.00 | Preferred place of death: patient declined discussion     |
| 107478 | 949E.00 | Patient died in usual place of residence                  |
| 108881 | 94Z9.00 | Preferred place of death: learning disability unit        |
| 109003 | 949G.00 | Patient died in hospice community lodge                   |
| 110669 | 947..12 | SD18 - cause of death clarif                              |
| 111135 | 94ZA.00 | Preferred place of death: mental health unit              |
| 111358 | 13O9.00 | Industrial death benefit                                  |
| 111646 | 949F.00 | Died in ambulance                                         |

<sup>a</sup>Date of death in CPRD consisted of 1) recorded death date for a patient in patient file; 2) transfer out date in patient file with transfer out reason as "death" (toreason = 1); 3) event date in clinical/referral file with Read code indicating "death," and 4) event date with "death administration" for entity type (enttype = 148) in additional file.

A/N, antenatal; h/o, history of; NOS, not otherwise specified; o/e, on examination; PM, post-mortem.



**References**

- 1 National Health Service (NHS). Read Codes.
